# Supplementary material for: A hierarchical regulatory network analysis of the vitamin D induced transcriptome reveals novel regulators and complete VDR dependency in monocytes
Source: Sci Rep. 2021 Mar 22;11:6518. doi: 10.1038/s41598-021-86032-5 (PMC7985518; doi:10.1038/s41598-021-86032-5)
Supplement: Supplementary file 3 — Supplementary Table 3 [file 41598_2021_86032_MOESM3_ESM.xlsx]

## Sheet: Tab S3
TF	DYNAMITE Coefficient	Rank
TBX15	0.75396	2
PPARG	0.439794	13
IRF5	0.41685	16
ELK1	0.187403	41
POU4F1	0.178753	43
ELK4	0.136061	65
ETS1	0.0652974	129
CUX1	0.0590904	139
E2F4	0.0546799	146
NR1I2	0.047894	157
MITF	0.0422822	170
ZNF41	0.0386294	181
TBX4	0.0340502	193
CENPB	0.0309157	206
GLIS3	0.017334	267
NFE2	0.0118223	296
KLF4	0.00925565	309
TFE3	0.00836016	313
TBP	0.0075948	316
KLF13	0.0068891	322
ELF4	0.00548708	328
EBF3	0.00379934	334
