# Supplementary material for: A hierarchical regulatory network analysis of the vitamin D induced transcriptome reveals novel regulators and complete VDR dependency in monocytes
Source: Sci Rep. 2021 Mar 22;11:6518. doi: 10.1038/s41598-021-86032-5 (PMC7985518; doi:10.1038/s41598-021-86032-5)
Supplement: Supplementary file 4 — Supplementary Table 4 [file 41598_2021_86032_MOESM4_ESM.xlsx]

## Sheet: CEBPA
ID	Description	GeneRatio	BgRatio	pvalue	p.adjust	qvalue	geneID	Count
R-HSA-983695	Antigen activates B Cell Receptor (BCR) leading to generation of second messengers	4/133	32/10654	0.000636485	0.0737905	0.0706449	ITPR2/TRPC1/FYN/LYN	4
R-HSA-75892	Platelet Adhesion to exposed collagen	3/133	15/10654	0.000775373	0.0737905	0.0706449	FCER1G/FYN/LYN	3
R-HSA-114604	GPVI-mediated activation cascade	4/133	35/10654	0.000900344	0.0737905	0.0706449	PDPN/FCER1G/FYN/LYN	4
R-HSA-6798695	Neutrophil degranulation	15/133	480/10654	0.000934078	0.0737905	0.0706449	CDA/PGM1/FCER1G/CTSD/ANO6/RAB27A/ITGAL/HP/SLC11A1/SIRPB1/ITGB2/PLD1/ATP11B/CXCL1/CLEC5A	15
R-HSA-2730905	Role of LAT2/NTAL/LAB on calcium mobilization	3/133	16/10654	0.000945627	0.0737905	0.0706449	FCER1G/FYN/LYN	3
R-HSA-877300	Interferon gamma signaling	6/133	92/10654	0.00100168	0.0737905	0.0706449	TRIM5/TRIM22/SOCS3/TRIM2/IRF5/TRIM35	6
R-HSA-202733	Cell surface interactions at the vascular wall	7/133	137/10654	0.00161652	0.102071	0.0977202	FCER1G/ITGAL/ITGB2/SLC7A11/TREM1/FYN/LYN	7
R-HSA-2172127	DAP12 interactions	4/133	43/10654	0.00196488	0.108559	0.103932	SIRPB1/TREM1/FYN/CLEC5A	4
R-HSA-2029480	Fcgamma receptor (FCGR) dependent phagocytosis	5/133	86/10654	0.00436601	0.197509	0.18909	ITPR2/PLD1/CYFIP2/FYN/LYN	5
R-HSA-5621480	Dectin-2 family	3/133	27/10654	0.00446854	0.197509	0.18909	FCER1G/FYN/LYN	3
R-HSA-76002	Platelet activation, signaling and aggregation	9/133	262/10654	0.00550907	0.221365	0.211928	PDPN/FCER1G/SRGN/ITPR2/PRKCH/PLEK/CD109/FYN/LYN	9
R-HSA-2871809	FCERI mediated Ca+2 mobilization	3/133	33/10654	0.00789419	0.25983	0.248754	FCER1G/ITPR2/LYN	3
R-HSA-1660517	Synthesis of PIPs at the late endosome membrane	2/133	11/10654	0.00790225	0.25983	0.248754	MTMR4/FIG4	2
R-HSA-196071	Metabolism of steroid hormones	3/133	35/10654	0.00930022	0.25983	0.248754	HSD11B1/HSD17B12/CYP19A1	3
R-HSA-2029481	FCGR activation	2/133	12/10654	0.00940563	0.25983	0.248754	FYN/LYN	2
R-HSA-210990	PECAM1 interactions	2/133	12/10654	0.00940563	0.25983	0.248754	FYN/LYN	2
R-HSA-449147	Signaling by Interleukins	12/133	461/10654	0.0125422	0.326096	0.312195	CSF3R/POU2F1/IRAK3/IL4R/SOCS3/ITGB2/IL17RE/CCR1/CXCL1/FYN/RALA/LYN	12
R-HSA-3928662	EPHB-mediated forward signaling	3/133	42/10654	0.0153153	0.332605	0.318426	ITSN1/FYN/LYN	3
R-HSA-1989781	PPARA activates gene expression	5/133	117/10654	0.0154874	0.332605	0.318426	G0S2/PPARG/ACSL1/HMGCR/PPARGC1B	5
R-HSA-1433559	Regulation of KIT signaling	2/133	16/10654	0.0165533	0.332605	0.318426	FYN/LYN	2
R-HSA-1660516	Synthesis of PIPs at the early endosome membrane	2/133	16/10654	0.0165533	0.332605	0.318426	MTMR4/FIG4	2
R-HSA-400206	Regulation of lipid metabolism by Peroxisome proliferator-activated receptor alpha (PPARalpha)	5/133	119/10654	0.016555	0.332605	0.318426	G0S2/PPARG/ACSL1/HMGCR/PPARGC1B	5
R-HSA-389513	CTLA4 inhibitory signaling	2/133	21/10654	0.0278181	0.512251	0.490414	FYN/LYN	2
R-HSA-5621575	CD209 (DC-SIGN) signaling	2/133	21/10654	0.0278181	0.512251	0.490414	FYN/LYN	2
R-HSA-983712	Ion channel transport	6/133	186/10654	0.0289735	0.512251	0.490414	ANO6/ATP6V0D1/ANO10/TRPC1/ATP11B/SGK1	6
R-HSA-912631	Regulation of signaling by CBL	2/133	22/10654	0.0303537	0.516012	0.494015	FYN/LYN	2
R-HSA-9006934	Signaling by Receptor Tyrosine Kinases	11/133	473/10654	0.0343238	0.518074	0.495989	LAMB3/ITPR2/MAP2K5/ATP6V0D1/INSR/NRG2/CYFIP2/FYN/RALA/TNS3/LYN	11
R-HSA-75876	Synthesis of very long-chain fatty acyl-CoAs	2/133	24/10654	0.0356863	0.518074	0.495989	HSD17B12/ACSL1	2
R-HSA-982772	Growth hormone receptor signaling	2/133	24/10654	0.0356863	0.518074	0.495989	SOCS3/LYN	2
R-HSA-380108	Chemokine receptors bind chemokines	3/133	59/10654	0.0372509	0.518074	0.495989	CCR1/CCRL2/CXCL1	3
R-HSA-913531	Interferon Signaling	6/133	199/10654	0.0384032	0.518074	0.495989	TRIM5/TRIM22/SOCS3/TRIM2/IRF5/TRIM35	6
R-HSA-2029485	Role of phospholipids in phagocytosis	2/133	25/10654	0.0384784	0.518074	0.495989	ITPR2/PLD1	2
R-HSA-375276	Peptide ligand-binding receptors	6/133	201/10654	0.040009	0.518074	0.495989	GALR2/CCR1/CCRL2/CXCL1/NLN/GRPR	6
R-HSA-425410	Metal ion SLC transporters	2/133	26/10654	0.0413509	0.518074	0.495989	SLC30A1/SLC11A1	2
R-HSA-77387	Insulin receptor recycling	2/133	26/10654	0.0413509	0.518074	0.495989	ATP6V0D1/INSR	2
R-HSA-8986944	Transcriptional Regulation by MECP2	3/133	62/10654	0.0421961	0.518074	0.495989	PPARG/HTT/SGK1	3
R-HSA-114508	Effects of PIP2 hydrolysis	2/133	27/10654	0.0443015	0.523565	0.501246	ITPR2/PRKCH	2
R-HSA-6785807	Interleukin-4 and Interleukin-13 signaling	4/133	108/10654	0.0460713	0.523565	0.501246	POU2F1/IL4R/SOCS3/ITGB2	4
R-HSA-76071	RNA Polymerase III Transcription Initiation From Type 3 Promoter	2/133	28/10654	0.0473278	0.523565	0.501246	POU2F1/POLR3B	2
R-HSA-2672351	Stimuli-sensing channels	4/133	109/10654	0.0473815	0.523565	0.501246	ANO6/ANO10/TRPC1/SGK1	4
R-HSA-983705	Signaling by the B Cell Receptor (BCR)	4/133	112/10654	0.0514355	0.554499	0.530862	ITPR2/TRPC1/FYN/LYN	4
R-HSA-3928663	EPHA-mediated growth cone collapse	2/133	30/10654	0.0535983	0.564058	0.540013	FYN/LYN	2
R-HSA-196807	Nicotinate metabolism	2/133	31/10654	0.056838	0.584241	0.559336	NMNAT2/CD38	2
R-HSA-373076	Class A/1 (Rhodopsin-like receptors)	8/133	335/10654	0.0584927	0.587586	0.562538	GPR18/GPR68/GALR2/CCR1/CCRL2/CXCL1/NLN/GRPR	8
R-HSA-2871796	FCERI mediated MAPK activation	2/133	32/10654	0.0601444	0.590751	0.565568	FCER1G/LYN	2
R-HSA-352230	Amino acid transport across the plasma membrane	2/133	33/10654	0.0635154	0.597315	0.571852	SLC6A6/SLC7A11	2
R-HSA-389356	CD28 co-stimulation	2/133	33/10654	0.0635154	0.597315	0.571852	FYN/LYN	2
R-HSA-70263	Gluconeogenesis	2/133	34/10654	0.0669488	0.603906	0.578162	GOT1/FBP1	2
R-HSA-936440	Negative regulators of DDX58/IFIH1 signaling	2/133	34/10654	0.0669488	0.603906	0.578162	TRAF3/NLRC5	2
R-HSA-1222556	ROS and RNS production in phagocytes	2/133	36/10654	0.0739949	0.60443	0.578664	ATP6V0D1/SLC11A1	2
R-HSA-76046	RNA Polymerase III Transcription Initiation	2/133	36/10654	0.0739949	0.60443	0.578664	POU2F1/POLR3B	2
R-HSA-75105	Fatty acyl-CoA biosynthesis	2/133	37/10654	0.0776036	0.60443	0.578664	HSD17B12/ACSL1	2
R-HSA-1500931	Cell-Cell communication	4/133	129/10654	0.0778503	0.60443	0.578664	LAMB3/SIRPB1/FYN/TESK1	4
R-HSA-2454202	Fc epsilon receptor (FCERI) signaling	4/133	134/10654	0.086699	0.60443	0.578664	FCER1G/ITPR2/FYN/LYN	4
R-HSA-1483255	PI Metabolism	3/133	84/10654	0.087567	0.60443	0.578664	PIK3C2B/MTMR4/FIG4	3
R-HSA-425366	Transport of bile salts and organic acids, metal ions and amine compounds	3/133	85/10654	0.0899802	0.60443	0.578664	SLC30A1/SLC11A1/SLC6A6	3
R-HSA-74158	RNA Polymerase III Transcription	2/133	41/10654	0.0925642	0.60443	0.578664	POU2F1/POLR3B	2
R-HSA-749476	RNA Polymerase III Abortive And Retractive Initiation	2/133	41/10654	0.0925642	0.60443	0.578664	POU2F1/POLR3B	2
R-HSA-8875878	MET promotes cell motility	2/133	41/10654	0.0925642	0.60443	0.578664	LAMB3/TNS3	2
R-HSA-194840	Rho GTPase cycle	4/133	138/10654	0.0941156	0.60443	0.578664	ARHGDIB/FGD4/ITSN1/RHOH	4
R-HSA-2173782	Binding and Uptake of Ligands by Scavenger Receptors	2/133	42/10654	0.0964266	0.60443	0.578664	SCARB1/HP	2
R-HSA-1433557	Signaling by SCF-KIT	2/133	43/10654	0.100334	0.60443	0.578664	FYN/LYN	2
R-HSA-5621481	C-type lectin receptors (CLRs)	4/133	142/10654	0.101824	0.60443	0.578664	FCER1G/ITPR2/FYN/LYN	4
R-HSA-2682334	EPH-Ephrin signaling	3/133	92/10654	0.107628	0.60443	0.578664	ITSN1/FYN/LYN	3
R-HSA-6783783	Interleukin-10 signaling	2/133	47/10654	0.116386	0.60443	0.578664	CCR1/CXCL1	2
R-HSA-112311	Neurotransmitter clearance	1/133	10/10654	0.118099	0.60443	0.578664	ALDH2	1
R-HSA-1250342	PI3K events in ERBB4 signaling	1/133	10/10654	0.118099	0.60443	0.578664	NRG2	1
R-HSA-194002	Glucocorticoid biosynthesis	1/133	10/10654	0.118099	0.60443	0.578664	HSD11B1	1
R-HSA-418890	Role of second messengers in netrin-1 signaling	1/133	10/10654	0.118099	0.60443	0.578664	TRPC1	1
R-HSA-74749	Signal attenuation	1/133	10/10654	0.118099	0.60443	0.578664	INSR	1
R-HSA-8957322	Metabolism of steroids	4/133	151/10654	0.120187	0.60443	0.578664	HSD11B1/HSD17B12/CYP19A1/HMGCR	4
R-HSA-512988	Interleukin-3, Interleukin-5 and GM-CSF signaling	2/133	48/10654	0.120495	0.60443	0.578664	FYN/LYN	2
R-HSA-1483257	Phospholipid metabolism	5/133	212/10654	0.126002	0.60443	0.578664	PIK3C2B/CHPT1/MTMR4/PLD1/FIG4	5
R-HSA-4420097	VEGFA-VEGFR2 Pathway	3/133	99/10654	0.126504	0.60443	0.578664	ITPR2/CYFIP2/FYN	3
R-HSA-1227986	Signaling by ERBB2	2/133	50/10654	0.12882	0.60443	0.578664	NRG2/FYN	2
R-HSA-373752	Netrin-1 signaling	2/133	50/10654	0.12882	0.60443	0.578664	TRPC1/FYN	2
R-HSA-381038	XBP1(S) activates chaperone genes	2/133	50/10654	0.12882	0.60443	0.578664	EXTL2/ATP6V0D1	2
R-HSA-1059683	Interleukin-6 signaling	1/133	11/10654	0.129118	0.60443	0.578664	SOCS3	1
R-HSA-193048	Androgen biosynthesis	1/133	11/10654	0.129118	0.60443	0.578664	HSD17B12	1
R-HSA-2586552	Signaling by Leptin	1/133	11/10654	0.129118	0.60443	0.578664	SOCS3	1
R-HSA-446107	Type I hemidesmosome assembly	1/133	11/10654	0.129118	0.60443	0.578664	LAMB3	1
R-HSA-73614	Pyrimidine salvage	1/133	11/10654	0.129118	0.60443	0.578664	CDA	1
R-HSA-611105	Respiratory electron transport	3/133	100/10654	0.129293	0.60443	0.578664	SDHD/UQCR11/NDUFA5	3
R-HSA-166520	Signaling by NTRKs	3/133	101/10654	0.132103	0.60443	0.578664	MAP2K5/FYN/RALA	3
R-HSA-3928665	EPH-ephrin mediated repulsion of cells	2/133	51/10654	0.133032	0.60443	0.578664	FYN/LYN	2
R-HSA-381070	IRE1alpha activates chaperones	2/133	52/10654	0.137275	0.60443	0.578664	EXTL2/ATP6V0D1	2
R-HSA-6811558	PI5P, PP2A and IER3 Regulate PI3K/AKT Signaling	3/133	103/10654	0.137789	0.60443	0.578664	INSR/NRG2/FYN	3
R-HSA-389359	CD28 dependent Vav1 pathway	1/133	12/10654	0.140001	0.60443	0.578664	FYN	1
R-HSA-5578768	Physiological factors	1/133	12/10654	0.140001	0.60443	0.578664	HIPK1	1
R-HSA-6803207	TP53 Regulates Transcription of Caspase Activators and Caspases	1/133	12/10654	0.140001	0.60443	0.578664	TP63	1
R-HSA-6803211	TP53 Regulates Transcription of Death Receptors and Ligands	1/133	12/10654	0.140001	0.60443	0.578664	TP63	1
R-HSA-71384	Ethanol oxidation	1/133	12/10654	0.140001	0.60443	0.578664	ALDH2	1
R-HSA-8963693	Aspartate and asparagine metabolism	1/133	12/10654	0.140001	0.60443	0.578664	GOT1	1
R-HSA-9013973	TICAM1-dependent activation of IRF3/IRF7	1/133	12/10654	0.140001	0.60443	0.578664	TRAF3	1
R-HSA-9027276	Erythropoietin activates Phosphoinositide-3-kinase (PI3K)	1/133	12/10654	0.140001	0.60443	0.578664	LYN	1
R-HSA-8848021	Signaling by PTK6	2/133	54/10654	0.145849	0.60443	0.578664	SOCS3/NRG2	2
R-HSA-9006927	Signaling by Non-Receptor Tyrosine Kinases	2/133	54/10654	0.145849	0.60443	0.578664	SOCS3/NRG2	2
R-HSA-194138	Signaling by VEGF	3/133	107/10654	0.149404	0.60443	0.578664	ITPR2/CYFIP2/FYN	3
R-HSA-9639288	Amino acids regulate mTORC1	2/133	55/10654	0.150177	0.60443	0.578664	SESN2/ATP6V0D1	2
R-HSA-1358803	Downregulation of ERBB2:ERBB3 signaling	1/133	13/10654	0.150749	0.60443	0.578664	NRG2	1
R-HSA-171007	p38MAPK events	1/133	13/10654	0.150749	0.60443	0.578664	RALA	1
R-HSA-2046104	alpha-linolenic (omega3) and linoleic (omega6) acid metabolism	1/133	13/10654	0.150749	0.60443	0.578664	ACSL1	1
R-HSA-2046106	alpha-linolenic acid (ALA) metabolism	1/133	13/10654	0.150749	0.60443	0.578664	ACSL1	1
R-HSA-2168880	Scavenging of heme from plasma	1/133	13/10654	0.150749	0.60443	0.578664	HP	1
R-HSA-5607763	CLEC7A (Dectin-1) induces NFAT activation	1/133	13/10654	0.150749	0.60443	0.578664	ITPR2	1
R-HSA-75205	Dissolution of Fibrin Clot	1/133	13/10654	0.150749	0.60443	0.578664	SERPINB8	1
R-HSA-8847993	ERBB2 Activates PTK6 Signaling	1/133	13/10654	0.150749	0.60443	0.578664	NRG2	1
R-HSA-5578775	Ion homeostasis	2/133	56/10654	0.154531	0.60443	0.578664	ITPR2/TRPC1	2
R-HSA-199418	Negative regulation of the PI3K/AKT network	3/133	110/10654	0.158316	0.60443	0.578664	INSR/NRG2/FYN	3
R-HSA-1250347	SHC1 events in ERBB4 signaling	1/133	14/10654	0.161364	0.60443	0.578664	NRG2	1
R-HSA-399955	SEMA3A-Plexin repulsion signaling by inhibiting Integrin adhesion	1/133	14/10654	0.161364	0.60443	0.578664	FYN	1
R-HSA-418885	DCC mediated attractive signaling	1/133	14/10654	0.161364	0.60443	0.578664	FYN	1
R-HSA-6803205	TP53 regulates transcription of several additional cell death genes whose specific roles in p53-dependent apoptosis remain uncertain	1/133	14/10654	0.161364	0.60443	0.578664	TP63	1
R-HSA-6804759	Regulation of TP53 Activity through Association with Co-factors	1/133	14/10654	0.161364	0.60443	0.578664	TP63	1
R-HSA-71240	Tryptophan catabolism	1/133	14/10654	0.161364	0.60443	0.578664	HAAO	1
R-HSA-877312	Regulation of IFNG signaling	1/133	14/10654	0.161364	0.60443	0.578664	SOCS3	1
R-HSA-9027284	Erythropoietin activates RAS	1/133	14/10654	0.161364	0.60443	0.578664	LYN	1
R-HSA-918233	TRAF3-dependent IRF activation pathway	1/133	14/10654	0.161364	0.60443	0.578664	TRAF3	1
R-HSA-193648	NRAGE signals death through JNK	2/133	59/10654	0.167733	0.605505	0.579693	FGD4/ITSN1	2
R-HSA-2032785	YAP1- and WWTR1 (TAZ)-stimulated gene expression	1/133	15/10654	0.171847	0.605505	0.579693	HIPK1	1
R-HSA-2214320	Anchoring fibril formation	1/133	15/10654	0.171847	0.605505	0.579693	LAMB3	1
R-HSA-6785631	ERBB2 Regulates Cell Motility	1/133	15/10654	0.171847	0.605505	0.579693	NRG2	1
R-HSA-844456	The NLRP3 inflammasome	1/133	15/10654	0.171847	0.605505	0.579693	NLRP3	1
R-HSA-975577	N-Glycan antennae elongation	1/133	15/10654	0.171847	0.605505	0.579693	MGAT4A	1
R-HSA-1474244	Extracellular matrix organization	6/133	301/10654	0.174425	0.605505	0.579693	ADAMTS4/LAMB3/CTSD/ITGAL/ITGB2/ADAM19	6
R-HSA-6790901	rRNA modification in the nucleus and cytosol	2/133	62/10654	0.181122	0.605505	0.579693	WDR3/NAT10	2
R-HSA-139853	Elevation of cytosolic Ca2+ levels	1/133	16/10654	0.1822	0.605505	0.579693	ITPR2	1
R-HSA-1963640	GRB2 events in ERBB2 signaling	1/133	16/10654	0.1822	0.605505	0.579693	NRG2	1
R-HSA-1963642	PI3K events in ERBB2 signaling	1/133	16/10654	0.1822	0.605505	0.579693	NRG2	1
R-HSA-3322077	Glycogen synthesis	1/133	16/10654	0.1822	0.605505	0.579693	PGM1	1
R-HSA-391160	Signal regulatory protein family interactions	1/133	16/10654	0.1822	0.605505	0.579693	SIRPB1	1
R-HSA-399954	Sema3A PAK dependent Axon repulsion	1/133	16/10654	0.1822	0.605505	0.579693	FYN	1
R-HSA-399956	CRMPs in Sema3A signaling	1/133	16/10654	0.1822	0.605505	0.579693	FYN	1
R-HSA-435354	Zinc transporters	1/133	17/10654	0.192424	0.617341	0.591025	SLC30A1	1
R-HSA-163200	Respiratory electron transport, ATP synthesis by chemiosmotic coupling, and heat production by uncoupling proteins.	3/133	123/10654	0.198652	0.617341	0.591025	SDHD/UQCR11/NDUFA5	3
R-HSA-1369062	ABC transporters in lipid homeostasis	1/133	18/10654	0.202522	0.617341	0.591025	ABCA5	1
R-HSA-1660514	Synthesis of PIPs at the Golgi membrane	1/133	18/10654	0.202522	0.617341	0.591025	FIG4	1
R-HSA-1912420	Pre-NOTCH Processing in Golgi	1/133	18/10654	0.202522	0.617341	0.591025	ST3GAL6	1
R-HSA-2022377	Metabolism of Angiotensinogen to Angiotensins	1/133	18/10654	0.202522	0.617341	0.591025	CTSD	1
R-HSA-446353	Cell-extracellular matrix interactions	1/133	18/10654	0.202522	0.617341	0.591025	TESK1	1
R-HSA-5609975	Diseases associated with glycosylation precursor biosynthesis	1/133	18/10654	0.202522	0.617341	0.591025	PGM1	1
R-HSA-5676594	TNF receptor superfamily (TNFSF) members mediating non-canonical NF-kB pathway	1/133	18/10654	0.202522	0.617341	0.591025	TRAF3	1
R-HSA-73780	RNA Polymerase III Chain Elongation	1/133	18/10654	0.202522	0.617341	0.591025	POLR3B	1
R-HSA-9037629	Lewis blood group biosynthesis	1/133	18/10654	0.202522	0.617341	0.591025	ST3GAL6	1
R-HSA-936964	Activation of IRF3/IRF7 mediated by TBK1/IKK epsilon	1/133	18/10654	0.202522	0.617341	0.591025	TRAF3	1
R-HSA-194315	Signaling by Rho GTPases	8/133	455/10654	0.208366	0.629264	0.602439	ARHGDIB/FGD4/EVL/FMNL1/CLASP1/ITSN1/RHOH/CYFIP2	8
R-HSA-3928664	Ephrin signaling	1/133	19/10654	0.212494	0.629264	0.602439	FYN	1
R-HSA-442660	Na+/Cl- dependent neurotransmitter transporters	1/133	19/10654	0.212494	0.629264	0.602439	SLC6A6	1
R-HSA-909733	Interferon alpha/beta signaling	2/133	69/10654	0.212911	0.629264	0.602439	SOCS3/IRF5	2
R-HSA-388841	Costimulation by the CD28 family	2/133	70/10654	0.2175	0.629264	0.602439	FYN/LYN	2
R-HSA-114608	Platelet degranulation	3/133	129/10654	0.218044	0.629264	0.602439	SRGN/PLEK/CD109	3
R-HSA-166016	Toll Like Receptor 4 (TLR4) Cascade	3/133	129/10654	0.218044	0.629264	0.602439	IRAK3/TRAF3/ITGB2	3
R-HSA-167044	Signalling to RAS	1/133	20/10654	0.222342	0.629264	0.602439	RALA	1
R-HSA-3232118	SUMOylation of transcription factors	1/133	20/10654	0.222342	0.629264	0.602439	MITF	1
R-HSA-622312	Inflammasomes	1/133	20/10654	0.222342	0.629264	0.602439	NLRP3	1
R-HSA-6803204	TP53 Regulates Transcription of Genes Involved in Cytochrome C Release	1/133	20/10654	0.222342	0.629264	0.602439	TP63	1
R-HSA-1445148	Translocation of SLC2A4 (GLUT4) to the plasma membrane	2/133	72/10654	0.226703	0.629264	0.602439	TBC1D1/RALA	2
R-HSA-198933	Immunoregulatory interactions between a Lymphoid and a non-Lymphoid cell	3/133	132/10654	0.227887	0.629264	0.602439	ITGAL/ITGB2/TREM1	3
R-HSA-500792	GPCR ligand binding	8/133	468/10654	0.230045	0.629264	0.602439	GPR18/GPR68/GALR2/CCR1/CCRL2/CXCL1/NLN/GRPR	8
R-HSA-5218921	VEGFR2 mediated cell proliferation	1/133	21/10654	0.232068	0.629264	0.602439	ITPR2	1
R-HSA-76005	Response to elevated platelet cytosolic Ca2+	3/133	134/10654	0.234495	0.629264	0.602439	SRGN/PLEK/CD109	3
R-HSA-2219530	Constitutive Signaling by Aberrant PI3K in Cancer	2/133	75/10654	0.240558	0.629264	0.602439	NRG2/FYN	2
R-HSA-1250196	SHC1 events in ERBB2 signaling	1/133	22/10654	0.241674	0.629264	0.602439	NRG2	1
R-HSA-389357	CD28 dependent PI3K/Akt signaling	1/133	22/10654	0.241674	0.629264	0.602439	FYN	1
R-HSA-5365859	RA biosynthesis pathway	1/133	22/10654	0.241674	0.629264	0.602439	RDH13	1
R-HSA-71403	Citric acid cycle (TCA cycle)	1/133	22/10654	0.241674	0.629264	0.602439	SDHD	1
R-HSA-9033658	Blood group systems biosynthesis	1/133	22/10654	0.241674	0.629264	0.602439	ST3GAL6	1
R-HSA-204998	Cell death signalling via NRAGE, NRIF and NADE	2/133	76/10654	0.245187	0.629264	0.602439	FGD4/ITSN1	2
R-HSA-373753	Nephrin family interactions	1/133	23/10654	0.25116	0.629264	0.602439	FYN	1
R-HSA-73980	RNA Polymerase III Transcription Termination	1/133	23/10654	0.25116	0.629264	0.602439	POLR3B	1
R-HSA-8956321	Nucleotide salvage	1/133	23/10654	0.25116	0.629264	0.602439	CDA	1
R-HSA-168928	DDX58/IFIH1-mediated induction of interferon-alpha/beta	2/133	78/10654	0.254454	0.629264	0.602439	TRAF3/NLRC5	2
R-HSA-74752	Signaling by Insulin receptor	2/133	78/10654	0.254454	0.629264	0.602439	ATP6V0D1/INSR	2
R-HSA-1474228	Degradation of the extracellular matrix	3/133	140/10654	0.254517	0.629264	0.602439	ADAMTS4/LAMB3/CTSD	3
R-HSA-5663220	RHO GTPases Activate Formins	3/133	140/10654	0.254517	0.629264	0.602439	EVL/FMNL1/CLASP1	3
R-HSA-5576891	Cardiac conduction	3/133	141/10654	0.257879	0.629264	0.602439	HIPK1/ITPR2/TRPC1	3
R-HSA-6806834	Signaling by MET	2/133	79/10654	0.259091	0.629264	0.602439	LAMB3/TNS3	2
R-HSA-449836	Other interleukin signaling	1/133	24/10654	0.260529	0.629264	0.602439	CSF3R	1
R-HSA-5260271	Diseases of Immune System	1/133	24/10654	0.260529	0.629264	0.602439	TRAF3	1
R-HSA-5602358	Diseases associated with the TLR signaling cascade	1/133	24/10654	0.260529	0.629264	0.602439	TRAF3	1
R-HSA-6783589	Interleukin-6 family signaling	1/133	24/10654	0.260529	0.629264	0.602439	SOCS3	1
R-HSA-187037	Signaling by NTRK1 (TRKA)	2/133	80/10654	0.263729	0.629264	0.602439	MAP2K5/RALA	2
R-HSA-416482	G alpha (12/13) signalling events	2/133	80/10654	0.263729	0.629264	0.602439	FGD4/ITSN1	2
R-HSA-1474165	Reproduction	3/133	144/10654	0.268001	0.629264	0.602439	BRCA2/IZUMO4/SYCP2	3
R-HSA-191273	Cholesterol biosynthesis	1/133	25/10654	0.269781	0.629264	0.602439	HMGCR	1
R-HSA-210991	Basigin interactions	1/133	25/10654	0.269781	0.629264	0.602439	SLC7A11	1
R-HSA-9006115	Signaling by NTRK2 (TRKB)	1/133	25/10654	0.269781	0.629264	0.602439	FYN	1
R-HSA-9006335	Signaling by Erythropoietin	1/133	25/10654	0.269781	0.629264	0.602439	LYN	1
R-HSA-2871837	FCERI mediated NF-kB activation	2/133	82/10654	0.273006	0.629264	0.602439	FCER1G/LYN	2
R-HSA-1187000	Fertilization	1/133	26/10654	0.278918	0.629264	0.602439	IZUMO4	1
R-HSA-2173788	Downregulation of TGF-beta receptor signaling	1/133	26/10654	0.278918	0.629264	0.602439	MTMR4	1
R-HSA-3238698	WNT ligand biogenesis and trafficking	1/133	26/10654	0.278918	0.629264	0.602439	WLS	1
R-HSA-5693554	Resolution of D-loop Structures through Synthesis-Dependent Strand Annealing (SDSA)	1/133	26/10654	0.278918	0.629264	0.602439	BRCA2	1
R-HSA-912694	Regulation of IFNA signaling	1/133	26/10654	0.278918	0.629264	0.602439	SOCS3	1
R-HSA-975576	N-glycan antennae elongation in the medial/trans-Golgi	1/133	26/10654	0.278918	0.629264	0.602439	MGAT4A	1
R-HSA-416476	G alpha (q) signalling events	4/133	217/10654	0.286766	0.629264	0.602439	ITPR2/PRKCH/GPR68/GRPR	4
R-HSA-216083	Integrin cell surface interactions	2/133	85/10654	0.286914	0.629264	0.602439	ITGAL/ITGB2	2
R-HSA-164952	The role of Nef in HIV-1 replication and disease pathogenesis	1/133	27/10654	0.287941	0.629264	0.602439	FYN	1
R-HSA-211976	Endogenous sterols	1/133	27/10654	0.287941	0.629264	0.602439	CYP19A1	1
R-HSA-264876	Insulin processing	1/133	27/10654	0.287941	0.629264	0.602439	RAB27A	1
R-HSA-76066	RNA Polymerase III Transcription Initiation From Type 2 Promoter	1/133	27/10654	0.287941	0.629264	0.602439	POLR3B	1
R-HSA-5628897	TP53 Regulates Metabolic Genes	2/133	86/10654	0.291544	0.629264	0.602439	SESN2/TP63	2
R-HSA-1483191	Synthesis of PC	1/133	28/10654	0.296853	0.629264	0.602439	CHPT1	1
R-HSA-1614635	Sulfur amino acid metabolism	1/133	28/10654	0.296853	0.629264	0.602439	GOT1	1
R-HSA-2022854	Keratan sulfate biosynthesis	1/133	28/10654	0.296853	0.629264	0.602439	ST3GAL6	1
R-HSA-3295583	TRP channels	1/133	28/10654	0.296853	0.629264	0.602439	TRPC1	1
R-HSA-76061	RNA Polymerase III Transcription Initiation From Type 1 Promoter	1/133	28/10654	0.296853	0.629264	0.602439	POLR3B	1
R-HSA-168898	Toll-like Receptor Cascades	3/133	155/10654	0.305449	0.629264	0.602439	IRAK3/TRAF3/ITGB2	3
R-HSA-5669034	TNFs bind their physiological receptors	1/133	29/10654	0.305654	0.629264	0.602439	CD70	1
R-HSA-8863795	Downregulation of ERBB2 signaling	1/133	29/10654	0.305654	0.629264	0.602439	NRG2	1
R-HSA-8982491	Glycogen metabolism	1/133	29/10654	0.305654	0.629264	0.602439	PGM1	1
R-HSA-2980736	Peptide hormone metabolism	2/133	90/10654	0.310025	0.629264	0.602439	CTSD/RAB27A	2
R-HSA-8876198	RAB GEFs exchange GTP for GDP on RABs	2/133	90/10654	0.310025	0.629264	0.602439	RAB27A/HPS4	2
R-HSA-114452	Activation of BH3-only proteins	1/133	30/10654	0.314346	0.629264	0.602439	TP63	1
R-HSA-2424491	DAP12 signaling	1/133	30/10654	0.314346	0.629264	0.602439	FYN	1
R-HSA-3000157	Laminin interactions	1/133	30/10654	0.314346	0.629264	0.602439	LAMB3	1
R-HSA-4090294	SUMOylation of intracellular receptors	1/133	30/10654	0.314346	0.629264	0.602439	PPARG	1
R-HSA-418360	Platelet calcium homeostasis	1/133	30/10654	0.314346	0.629264	0.602439	ITPR2	1
R-HSA-8874081	MET activates PTK2 signaling	1/133	30/10654	0.314346	0.629264	0.602439	LAMB3	1
R-HSA-446728	Cell junction organization	2/133	91/10654	0.314632	0.629264	0.602439	LAMB3/TESK1	2
R-HSA-70326	Glucose metabolism	2/133	91/10654	0.314632	0.629264	0.602439	GOT1/FBP1	2
R-HSA-5633007	Regulation of TP53 Activity	3/133	160/10654	0.322568	0.637208	0.610045	HIPK1/TP63/SGK1	3
R-HSA-8949613	Cristae formation	1/133	31/10654	0.322929	0.637208	0.610045	APOO	1
R-HSA-917977	Transferrin endocytosis and recycling	1/133	31/10654	0.322929	0.637208	0.610045	ATP6V0D1	1
R-HSA-381119	Unfolded Protein Response (UPR)	2/133	94/10654	0.32841	0.638037	0.610838	EXTL2/ATP6V0D1	2
R-HSA-1251985	Nuclear signaling by ERBB4	1/133	32/10654	0.331406	0.638037	0.610838	NRG2	1
R-HSA-2173789	TGF-beta receptor signaling activates SMADs	1/133	32/10654	0.331406	0.638037	0.610838	MTMR4	1
R-HSA-9006925	Intracellular signaling by second messengers	5/133	305/10654	0.332773	0.638037	0.610838	ITPR2/INSR/PPARG/NRG2/FYN	5
R-HSA-1592230	Mitochondrial biogenesis	2/133	95/10654	0.332987	0.638037	0.610838	PPARGC1B/APOO	2
R-HSA-202433	Generation of second messenger molecules	1/133	33/10654	0.339778	0.638037	0.610838	EVL	1
R-HSA-2559585	Oncogene Induced Senescence	1/133	33/10654	0.339778	0.638037	0.610838	ETS1	1
R-HSA-4085001	Sialic acid metabolism	1/133	33/10654	0.339778	0.638037	0.610838	ST3GAL6	1
R-HSA-5693568	Resolution of D-loop Structures through Holliday Junction Intermediates	1/133	33/10654	0.339778	0.638037	0.610838	BRCA2	1
R-HSA-8964043	Plasma lipoprotein clearance	1/133	33/10654	0.339778	0.638037	0.610838	SCARB1	1
R-HSA-9022692	Regulation of MECP2 expression and activity	1/133	33/10654	0.339778	0.638037	0.610838	HTT	1
R-HSA-193704	p75 NTR receptor-mediated signalling	2/133	97/10654	0.342115	0.638037	0.610838	FGD4/ITSN1	2
R-HSA-6803157	Antimicrobial peptides	2/133	97/10654	0.342115	0.638037	0.610838	GNLY/SLC11A1	2
R-HSA-1638074	Keratan sulfate/keratin metabolism	1/133	34/10654	0.348045	0.640983	0.613659	ST3GAL6	1
R-HSA-187687	Signalling to ERKs	1/133	34/10654	0.348045	0.640983	0.613659	RALA	1
R-HSA-5693537	Resolution of D-Loop Structures	1/133	34/10654	0.348045	0.640983	0.613659	BRCA2	1
R-HSA-2219528	PI3K/AKT Signaling in Cancer	2/133	101/10654	0.36025	0.658051	0.629999	NRG2/FYN	2
R-HSA-5579029	Metabolic disorders of biological oxidation enzymes	1/133	36/10654	0.364273	0.658051	0.629999	CYP19A1	1
R-HSA-5663213	RHO GTPases Activate WASPs and WAVEs	1/133	36/10654	0.364273	0.658051	0.629999	CYFIP2	1
R-HSA-6804757	Regulation of TP53 Degradation	1/133	36/10654	0.364273	0.658051	0.629999	SGK1	1
R-HSA-5668541	TNFR2 non-canonical NF-kB pathway	2/133	102/10654	0.364757	0.658051	0.629999	TRAF3/CD70	2
R-HSA-382556	ABC-family proteins mediated transport	2/133	103/10654	0.369251	0.658114	0.630059	ABCB10/ABCA5	2
R-HSA-1428517	The citric acid (TCA) cycle and respiratory electron transport	3/133	174/10654	0.370447	0.658114	0.630059	SDHD/UQCR11/NDUFA5	3
R-HSA-5083635	Defective B3GALTL causes Peters-plus syndrome (PpS)	1/133	37/10654	0.372236	0.658114	0.630059	ADAMTS4	1
R-HSA-5689901	Metalloprotease DUBs	1/133	37/10654	0.372236	0.658114	0.630059	NLRP3	1
R-HSA-6806003	Regulation of TP53 Expression and Degradation	1/133	37/10654	0.372236	0.658114	0.630059	SGK1	1
R-HSA-5173214	O-glycosylation of TSR domain-containing proteins	1/133	38/10654	0.3801	0.661435	0.633238	ADAMTS4	1
R-HSA-5689896	Ovarian tumor domain proteases	1/133	38/10654	0.3801	0.661435	0.633238	TRAF3	1
R-HSA-8939243	RUNX1 interacts with co-factors whose precise effect on RUNX1 targets is not known	1/133	38/10654	0.3801	0.661435	0.633238	SMARCA2	1
R-HSA-8950505	Gene and protein expression by JAK-STAT signaling after Interleukin-12 stimulation	1/133	38/10654	0.3801	0.661435	0.633238	RALA	1
R-HSA-211945	Phase I - Functionalization of compounds	2/133	106/10654	0.382659	0.661484	0.633286	ALDH2/CYP19A1	2
R-HSA-425407	SLC-mediated transmembrane transport	4/133	251/10654	0.383122	0.661484	0.633286	SLC30A1/SLC11A1/SLC6A6/SLC7A11	4
R-HSA-163841	Gamma carboxylation, hypusine formation and arylsulfatase activation	1/133	39/10654	0.387867	0.664485	0.636158	DPH5	1
R-HSA-5693616	Presynaptic phase of homologous DNA pairing and strand exchange	1/133	39/10654	0.387867	0.664485	0.636158	BRCA2	1
R-HSA-425393	Transport of inorganic cations/anions and amino acids/oligopeptides	2/133	108/10654	0.391531	0.668173	0.639689	SLC6A6/SLC7A11	2
R-HSA-1483166	Synthesis of PA	1/133	40/10654	0.395536	0.672412	0.643747	PLD1	1
R-HSA-1489509	DAG and IP3 signaling	1/133	42/10654	0.410591	0.687428	0.658124	ITPR2	1
R-HSA-2426168	Activation of gene expression by SREBF (SREBP)	1/133	42/10654	0.410591	0.687428	0.658124	HMGCR	1
R-HSA-381676	Glucagon-like Peptide-1 (GLP1) regulates insulin secretion	1/133	42/10654	0.410591	0.687428	0.658124	ITPR2	1
R-HSA-5693579	Homologous DNA Pairing and Strand Exchange	1/133	42/10654	0.410591	0.687428	0.658124	BRCA2	1
R-HSA-1296072	Voltage gated Potassium channels	1/133	43/10654	0.417978	0.693619	0.66405	KCNA3	1
R-HSA-5362517	Signaling by Retinoic Acid	1/133	43/10654	0.417978	0.693619	0.66405	RDH13	1
R-HSA-1257604	PIP3 activates AKT signaling	4/133	264/10654	0.419897	0.693619	0.66405	INSR/PPARG/NRG2/FYN	4
R-HSA-5633008	TP53 Regulates Transcription of Cell Death Genes	1/133	44/10654	0.425273	0.693619	0.66405	TP63	1
R-HSA-6811438	Intra-Golgi traffic	1/133	44/10654	0.425273	0.693619	0.66405	STX6	1
R-HSA-69231	Cyclin D associated events in G1	1/133	44/10654	0.425273	0.693619	0.66405	LYN	1
R-HSA-69236	G1 Phase	1/133	44/10654	0.425273	0.693619	0.66405	LYN	1
R-HSA-1500620	Meiosis	2/133	118/10654	0.434993	0.706863	0.67673	BRCA2/SYCP2	2
R-HSA-9020591	Interleukin-12 signaling	1/133	47/10654	0.446618	0.723096	0.692271	RALA	1
R-HSA-418597	G alpha (z) signalling events	1/133	48/10654	0.453557	0.731651	0.700461	PRKCH	1
R-HSA-196849	Metabolism of water-soluble vitamins and cofactors	2/133	123/10654	0.456101	0.733079	0.701829	NMNAT2/CD38	2
R-HSA-9007101	Rab regulation of trafficking	2/133	124/10654	0.460269	0.734661	0.703343	RAB27A/HPS4	2
R-HSA-6811440	Retrograde transport at the Trans-Golgi-Network	1/133	49/10654	0.46041	0.734661	0.703343	STX6	1
R-HSA-3214842	HDMs demethylate histones	1/133	50/10654	0.467177	0.742777	0.711113	KDM2A	1
R-HSA-383280	Nuclear Receptor transcription pathway	1/133	52/10654	0.480459	0.759024	0.726667	PPARG	1
R-HSA-1483206	Glycerophospholipid biosynthesis	2/133	129/10654	0.48083	0.759024	0.726667	CHPT1/PLD1	2
R-HSA-397014	Muscle contraction	3/133	209/10654	0.486293	0.760579	0.728156	HIPK1/ITPR2/TRPC1	3
R-HSA-109606	Intrinsic Pathway for Apoptosis	1/133	53/10654	0.486977	0.760579	0.728156	TP63	1
R-HSA-1660499	Synthesis of PIPs at the plasma membrane	1/133	53/10654	0.486977	0.760579	0.728156	PIK3C2B	1
R-HSA-112043	PLC beta mediated events	1/133	54/10654	0.493413	0.761718	0.729246	ITPR2	1
R-HSA-74751	Insulin receptor signalling cascade	1/133	54/10654	0.493413	0.761718	0.729246	INSR	1
R-HSA-112040	G-protein mediated events	1/133	55/10654	0.499769	0.761718	0.729246	ITPR2	1
R-HSA-1655829	Regulation of cholesterol biosynthesis by SREBP (SREBF)	1/133	55/10654	0.499769	0.761718	0.729246	HMGCR	1
R-HSA-168643	Nucleotide-binding domain, leucine rich repeat containing receptor (NLR) signaling pathways	1/133	55/10654	0.499769	0.761718	0.729246	NLRP3	1
R-HSA-6799198	Complex I biogenesis	1/133	55/10654	0.499769	0.761718	0.729246	NDUFA5	1
R-HSA-71406	Pyruvate metabolism and Citric Acid (TCA) cycle	1/133	55/10654	0.499769	0.761718	0.729246	SDHD	1
R-HSA-71387	Metabolism of carbohydrates	4/133	295/10654	0.505102	0.763388	0.730845	PGM1/GOT1/ST3GAL6/FBP1	4
R-HSA-2151201	Transcriptional activation of mitochondrial biogenesis	1/133	56/10654	0.506047	0.763388	0.730845	PPARGC1B	1
R-HSA-6794361	Neurexins and neuroligins	1/133	56/10654	0.506047	0.763388	0.730845	NLGN4Y	1
R-HSA-447115	Interleukin-12 family signaling	1/133	57/10654	0.512245	0.7675	0.734782	RALA	1
R-HSA-936837	Ion transport by P-type ATPases	1/133	57/10654	0.512245	0.7675	0.734782	ATP11B	1
R-HSA-376176	Signaling by ROBO receptors	3/133	218/10654	0.514509	0.768288	0.735536	UPF2/EVL/CLASP1	3
R-HSA-1236394	Signaling by ERBB4	1/133	58/10654	0.518367	0.768853	0.736078	NRG2	1
R-HSA-917937	Iron uptake and transport	1/133	58/10654	0.518367	0.768853	0.736078	ATP6V0D1	1
R-HSA-3000171	Non-integrin membrane-ECM interactions	1/133	59/10654	0.524413	0.775219	0.742172	LAMB3	1
R-HSA-73887	Death Receptor Signalling	2/133	141/10654	0.528176	0.77818	0.745007	FGD4/ITSN1	2
R-HSA-3781865	Diseases of glycosylation	2/133	143/10654	0.535782	0.77972	0.746482	PGM1/ADAMTS4	2
R-HSA-2022090	Assembly of collagen fibrils and other multimeric structures	1/133	61/10654	0.536278	0.77972	0.746482	LAMB3	1
R-HSA-2029482	Regulation of actin dynamics for phagocytic cup formation	1/133	61/10654	0.536278	0.77972	0.746482	CYFIP2	1
R-HSA-8943724	Regulation of PTEN gene transcription	1/133	61/10654	0.536278	0.77972	0.746482	PPARG	1
R-HSA-4086398	Ca2+ pathway	1/133	62/10654	0.542101	0.785601	0.752112	ITPR2	1
R-HSA-1834949	Cytosolic sensors of pathogen-associated DNA	1/133	63/10654	0.54785	0.786201	0.752686	POLR3B	1
R-HSA-375165	NCAM signaling for neurite out-growth	1/133	63/10654	0.54785	0.786201	0.752686	FYN	1
R-HSA-446219	Synthesis of substrates in N-glycan biosythesis	1/133	63/10654	0.54785	0.786201	0.752686	ST3GAL6	1
R-HSA-1442490	Collagen degradation	1/133	64/10654	0.553528	0.791778	0.758025	CTSD	1
R-HSA-373755	Semaphorin interactions	1/133	65/10654	0.559136	0.794444	0.760578	FYN	1
R-HSA-8873719	RAB geranylgeranylation	1/133	65/10654	0.559136	0.794444	0.760578	RAB27A	1
R-HSA-9018519	Estrogen-dependent gene expression	2/133	150/10654	0.561741	0.794444	0.760578	POU2F1/CTSD	2
R-HSA-8951664	Neddylation	3/133	234/10654	0.562582	0.794444	0.760578	SOCS3/COMMD7/FEM1C	3
R-HSA-211897	Cytochrome P450 - arranged by substrate type	1/133	66/10654	0.564673	0.794858	0.760974	CYP19A1	1
R-HSA-5685942	HDR through Homologous Recombination (HRR)	1/133	67/10654	0.570141	0.797476	0.76348	BRCA2	1
R-HSA-6802952	Signaling by BRAF and RAF fusions	1/133	67/10654	0.570141	0.797476	0.76348	AGTRAP	1
R-HSA-3906995	Diseases associated with O-glycosylation of proteins	1/133	68/10654	0.575541	0.799495	0.765413	ADAMTS4	1
R-HSA-418594	G alpha (i) signalling events	5/133	406/10654	0.576154	0.799495	0.765413	ITPR2/GPR18/GALR2/CCR1/CXCL1	5
R-HSA-8878171	Transcriptional regulation by RUNX1	3/133	239/10654	0.577011	0.799495	0.765413	ELF1/SOCS3/SMARCA2	3
R-HSA-174824	Plasma lipoprotein assembly, remodeling, and clearance	1/133	69/10654	0.580874	0.802332	0.76813	SCARB1	1
R-HSA-380259	Loss of Nlp from mitotic centrosomes	1/133	70/10654	0.58614	0.803157	0.768919	CLASP1	1
R-HSA-380284	Loss of proteins required for interphase microtubule organization from the centrosome	1/133	70/10654	0.58614	0.803157	0.768919	CLASP1	1
R-HSA-195258	RHO GTPase Effectors	4/133	327/10654	0.586922	0.803157	0.768919	EVL/FMNL1/CLASP1/CYFIP2	4
R-HSA-6802957	Oncogenic MAPK signaling	1/133	71/10654	0.591341	0.806706	0.772317	AGTRAP	1
R-HSA-448424	Interleukin-17 signaling	1/133	72/10654	0.596477	0.810623	0.776067	IL17RE	1
R-HSA-170834	Signaling by TGF-beta Receptor Complex	1/133	73/10654	0.601548	0.810623	0.776067	MTMR4	1
R-HSA-8854518	AURKA Activation by TPX2	1/133	73/10654	0.601548	0.810623	0.776067	CLASP1	1
R-HSA-8939902	Regulation of RUNX2 expression and activity	1/133	73/10654	0.601548	0.810623	0.776067	PPARGC1B	1
R-HSA-6807505	RNA polymerase II transcribes snRNA genes	1/133	74/10654	0.606557	0.814888	0.78015	POU2F1	1
R-HSA-983231	Factors involved in megakaryocyte development and platelet production	2/133	168/10654	0.623683	0.833374	0.797848	EHD1/AK3	2
R-HSA-422356	Regulation of insulin secretion	1/133	78/10654	0.625973	0.833374	0.797848	ITPR2	1
R-HSA-446193	Biosynthesis of the N-glycan precursor (dolichol lipid-linked oligosaccharide, LLO) and transfer to a nascent protein	1/133	78/10654	0.625973	0.833374	0.797848	ST3GAL6	1
R-HSA-1221632	Meiotic synapsis	1/133	79/10654	0.630677	0.834608	0.79903	SYCP2	1
R-HSA-3214858	RMTs methylate histone arginines	1/133	79/10654	0.630677	0.834608	0.79903	SMARCA2	1
R-HSA-380270	Recruitment of mitotic centrosome proteins and complexes	1/133	82/10654	0.644438	0.847743	0.811605	CLASP1	1
R-HSA-380287	Centrosome maturation	1/133	82/10654	0.644438	0.847743	0.811605	CLASP1	1
R-HSA-8978868	Fatty acid metabolism	2/133	177/10654	0.652048	0.851518	0.815218	HSD17B12/ACSL1	2
R-HSA-381340	Transcriptional regulation of white adipocyte differentiation	1/133	84/10654	0.653329	0.851518	0.815218	PPARG	1
R-HSA-912446	Meiotic recombination	1/133	86/10654	0.661999	0.851518	0.815218	BRCA2	1
R-HSA-5368286	Mitochondrial translation initiation	1/133	87/10654	0.666252	0.851518	0.815218	MRPL15	1
R-HSA-5389840	Mitochondrial translation elongation	1/133	87/10654	0.666252	0.851518	0.815218	MRPL15	1
R-HSA-5419276	Mitochondrial translation termination	1/133	87/10654	0.666252	0.851518	0.815218	MRPL15	1
R-HSA-6794362	Protein-protein interactions at synapses	1/133	87/10654	0.666252	0.851518	0.815218	NLGN4Y	1
R-HSA-3108232	SUMO E3 ligases SUMOylate target proteins	2/133	182/10654	0.667065	0.851518	0.815218	PPARG/MITF	2
R-HSA-2565942	Regulation of PLK1 Activity at G2/M Transition	1/133	88/10654	0.670453	0.851518	0.815218	CLASP1	1
R-HSA-418346	Platelet homeostasis	1/133	88/10654	0.670453	0.851518	0.815218	ITPR2	1
R-HSA-3700989	Transcriptional Regulation by TP53	4/133	365/10654	0.673247	0.851518	0.815218	SESN2/HIPK1/TP63/SGK1	4
R-HSA-5687128	MAPK6/MAPK4 signaling	1/133	89/10654	0.674601	0.851518	0.815218	MAPK6	1
R-HSA-1474290	Collagen formation	1/133	90/10654	0.678698	0.851518	0.815218	LAMB3	1
R-HSA-9616222	Transcriptional regulation of granulopoiesis	1/133	90/10654	0.678698	0.851518	0.815218	CSF3R	1
R-HSA-111885	Opioid Signalling	1/133	91/10654	0.682743	0.851518	0.815218	ITPR2	1
R-HSA-2990846	SUMOylation	2/133	188/10654	0.684397	0.851518	0.815218	PPARG/MITF	2
R-HSA-6804756	Regulation of TP53 Activity through Phosphorylation	1/133	92/10654	0.686737	0.851518	0.815218	HIPK1	1
R-HSA-196854	Metabolism of vitamins and cofactors	2/133	189/10654	0.687214	0.851518	0.815218	NMNAT2/CD38	2
R-HSA-163125	Post-translational modification: synthesis of GPI-anchored proteins	1/133	93/10654	0.690682	0.851518	0.815218	CD109	1
R-HSA-5368287	Mitochondrial translation	1/133	93/10654	0.690682	0.851518	0.815218	MRPL15	1
R-HSA-168164	Toll Like Receptor 3 (TLR3) Cascade	1/133	94/10654	0.694577	0.851518	0.815218	TRAF3	1
R-HSA-380320	Recruitment of NuMA to mitotic centrosomes	1/133	94/10654	0.694577	0.851518	0.815218	CLASP1	1
R-HSA-166058	MyD88:MAL(TIRAP) cascade initiated on plasma membrane	1/133	95/10654	0.698424	0.851518	0.815218	IRAK3	1
R-HSA-168188	Toll Like Receptor TLR6:TLR2 Cascade	1/133	95/10654	0.698424	0.851518	0.815218	IRAK3	1
R-HSA-141424	Amplification of signal from the kinetochores	1/133	96/10654	0.702223	0.851518	0.815218	CLASP1	1
R-HSA-141444	Amplification of signal from unattached kinetochores via a MAD2 inhibitory signal	1/133	96/10654	0.702223	0.851518	0.815218	CLASP1	1
R-HSA-8878159	Transcriptional regulation by RUNX3	1/133	96/10654	0.702223	0.851518	0.815218	ITGAL	1
R-HSA-8868773	rRNA processing in the nucleus and cytosol	2/133	195/10654	0.703685	0.851518	0.815218	WDR3/NAT10	2
R-HSA-168179	Toll Like Receptor TLR1:TLR2 Cascade	1/133	98/10654	0.709678	0.851518	0.815218	IRAK3	1
R-HSA-181438	Toll Like Receptor 2 (TLR2) Cascade	1/133	98/10654	0.709678	0.851518	0.815218	IRAK3	1
R-HSA-5620912	Anchoring of the basal body to the plasma membrane	1/133	98/10654	0.709678	0.851518	0.815218	CLASP1	1
R-HSA-1296071	Potassium Channels	1/133	99/10654	0.713336	0.851518	0.815218	KCNA3	1
R-HSA-166166	MyD88-independent TLR4 cascade	1/133	99/10654	0.713336	0.851518	0.815218	TRAF3	1
R-HSA-937061	TRIF(TICAM1)-mediated TLR4 signaling	1/133	99/10654	0.713336	0.851518	0.815218	TRAF3	1
R-HSA-5683057	MAPK family signaling cascades	3/133	294/10654	0.715276	0.851518	0.815218	MAPK6/NRG2/FYN	3
R-HSA-1852241	Organelle biogenesis and maintenance	3/133	296/10654	0.719582	0.851518	0.815218	CLASP1/PPARGC1B/APOO	3
R-HSA-15869	Metabolism of nucleotides	1/133	101/10654	0.720515	0.851518	0.815218	CDA	1
R-HSA-5607764	CLEC7A (Dectin-1) signaling	1/133	101/10654	0.720515	0.851518	0.815218	ITPR2	1
R-HSA-9006936	Signaling by TGF-beta family members	1/133	102/10654	0.724038	0.852454	0.816115	MTMR4	1
R-HSA-9006931	Signaling by Nuclear Receptors	3/133	299/10654	0.725947	0.852454	0.816115	POU2F1/CTSD/RDH13	3
R-HSA-9020702	Interleukin-1 signaling	1/133	103/10654	0.727516	0.852454	0.816115	IRAK3	1
R-HSA-72312	rRNA processing	2/133	205/10654	0.729543	0.852454	0.816115	WDR3/NAT10	2
R-HSA-5668914	Diseases of metabolism	1/133	104/10654	0.730951	0.852454	0.816115	CYP19A1	1
R-HSA-8856825	Cargo recognition for clathrin-mediated endocytosis	1/133	106/10654	0.737692	0.858052	0.821474	ITSN1	1
R-HSA-163685	Integration of energy metabolism	1/133	108/10654	0.744265	0.861166	0.824455	ITPR2	1
R-HSA-8957275	Post-translational protein phosphorylation	1/133	108/10654	0.744265	0.861166	0.824455	MGAT4A	1
R-HSA-1912422	Pre-NOTCH Expression and Processing	1/133	109/10654	0.74749	0.862639	0.825866	ST3GAL6	1
R-HSA-5173105	O-linked glycosylation	1/133	112/10654	0.756926	0.86899	0.831946	ADAMTS4	1
R-HSA-69618	Mitotic Spindle Checkpoint	1/133	112/10654	0.756926	0.86899	0.831946	CLASP1	1
R-HSA-927802	Nonsense-Mediated Decay (NMD)	1/133	115/10654	0.766011	0.874876	0.83758	UPF2	1
R-HSA-975957	Nonsense Mediated Decay (NMD) enhanced by the Exon Junction Complex (EJC)	1/133	115/10654	0.766011	0.874876	0.83758	UPF2	1
R-HSA-211859	Biological oxidations	2/133	222/10654	0.769139	0.876184	0.838833	ALDH2/CYP19A1	2
R-HSA-8939211	ESR-mediated signaling	2/133	223/10654	0.771305	0.876393	0.839033	POU2F1/CTSD	2
R-HSA-202403	TCR signaling	1/133	119/10654	0.777603	0.881283	0.843714	EVL	1
R-HSA-8878166	Transcriptional regulation by RUNX2	1/133	121/10654	0.783183	0.885337	0.847596	PPARGC1B	1
R-HSA-2132295	MHC class II antigen presentation	1/133	123/10654	0.788624	0.889214	0.851307	CTSD	1
R-HSA-1630316	Glycosaminoglycan metabolism	1/133	124/10654	0.791293	0.889953	0.852015	ST3GAL6	1
R-HSA-381426	Regulation of Insulin-like Growth Factor (IGF) transport and uptake by Insulin-like Growth Factor Binding Proteins (IGFBPs)	1/133	125/10654	0.79393	0.890652	0.852684	MGAT4A	1
R-HSA-2500257	Resolution of Sister Chromatid Cohesion	1/133	126/10654	0.796533	0.89131	0.853314	CLASP1	1
R-HSA-162909	Host Interactions of HIV factors	1/133	129/10654	0.804147	0.897559	0.859296	FYN	1
R-HSA-5693567	HDR through Homologous Recombination (HRR) or Single Strand Annealing (SSA)	1/133	132/10654	0.811479	0.903461	0.864947	BRCA2	1
R-HSA-5673001	RAF/MAP kinase cascade	2/133	249/10654	0.821735	0.91258	0.873678	NRG2/FYN	2
R-HSA-5693538	Homology Directed Repair	1/133	138/10654	0.825336	0.914282	0.875307	BRCA2	1
R-HSA-446652	Interleukin-1 family signaling	1/133	140/10654	0.829726	0.914561	0.875574	IRAK3	1
R-HSA-6807070	PTEN Regulation	1/133	140/10654	0.829726	0.914561	0.875574	PPARG	1
R-HSA-5684996	MAPK1/MAPK3 signaling	2/133	255/10654	0.83187	0.914643	0.875653	NRG2/FYN	2
R-HSA-3858494	Beta-catenin independent WNT signaling	1/133	146/10654	0.842251	0.921473	0.882191	ITPR2	1
R-HSA-8856828	Clathrin-mediated endocytosis	1/133	146/10654	0.842251	0.921473	0.882191	ITSN1	1
R-HSA-212165	Epigenetic regulation of gene expression	1/133	149/10654	0.848166	0.921474	0.882193	TET2	1
R-HSA-453279	Mitotic G1-G1/S phases	1/133	149/10654	0.848166	0.921474	0.882193	LYN	1
R-HSA-71291	Metabolism of amino acids and derivatives	3/133	372/10654	0.848507	0.921474	0.882193	SERINC2/GOT1/HAAO	3
R-HSA-9607240	FLT3 Signaling	2/133	267/10654	0.850607	0.921491	0.882208	NRG2/FYN	2
R-HSA-5663202	Diseases of signal transduction	3/133	377/10654	0.854849	0.923822	0.88444	AGTRAP/NRG2/FYN	3
R-HSA-3247509	Chromatin modifying enzymes	2/133	274/10654	0.860646	0.925561	0.886105	KDM2A/SMARCA2	2
R-HSA-4839726	Chromatin organization	2/133	274/10654	0.860646	0.925561	0.886105	KDM2A/SMARCA2	2
R-HSA-5693532	DNA Double-Strand Break Repair	1/133	166/10654	0.877756	0.94167	0.901528	BRCA2	1
R-HSA-9010553	Regulation of expression of SLITs and ROBOs	1/133	171/10654	0.885314	0.947479	0.907089	UPF2	1
R-HSA-5688426	Deubiquitination	2/133	297/10654	0.889464	0.9486	0.908162	NLRP3/TRAF3	2
R-HSA-112316	Neuronal System	3/133	413/10654	0.894073	0.9486	0.908162	KCNA3/ALDH2/NLGN4Y	3
R-HSA-109581	Apoptosis	1/133	178/10654	0.895123	0.9486	0.908162	TP63	1
R-HSA-446203	Asparagine N-linked glycosylation	2/133	304/10654	0.897082	0.9486	0.908162	MGAT4A/ST3GAL6	2
R-HSA-5357801	Programmed Cell Death	1/133	181/10654	0.899067	0.9486	0.908162	TP63	1
R-HSA-6791226	Major pathway of rRNA processing in the nucleolus and cytosol	1/133	185/10654	0.904098	0.9486	0.908162	WDR3	1
R-HSA-948021	Transport to the Golgi and subsequent modification	1/133	185/10654	0.904098	0.9486	0.908162	MGAT4A	1
R-HSA-2467813	Separation of Sister Chromatids	1/133	190/10654	0.910038	0.9486	0.908162	CLASP1	1
R-HSA-2559583	Cellular Senescence	1/133	195/10654	0.915613	0.9486	0.908162	ETS1	1
R-HSA-69275	G2/M Transition	1/133	196/10654	0.916686	0.9486	0.908162	CLASP1	1
R-HSA-453274	Mitotic G2-G2/M phases	1/133	198/10654	0.918792	0.9486	0.908162	CLASP1	1
R-HSA-68877	Mitotic Prometaphase	1/133	200/10654	0.920845	0.9486	0.908162	CLASP1	1
R-HSA-5617833	Cilium Assembly	1/133	201/10654	0.921852	0.9486	0.908162	CLASP1	1
R-HSA-68882	Mitotic Anaphase	1/133	201/10654	0.921852	0.9486	0.908162	CLASP1	1
R-HSA-195721	Signaling by WNT	2/133	331/10654	0.922138	0.9486	0.908162	WLS/ITPR2	2
R-HSA-2555396	Mitotic Metaphase and Anaphase	1/133	202/10654	0.922846	0.9486	0.908162	CLASP1	1
R-HSA-6811442	Intra-Golgi and retrograde Golgi-to-ER traffic	1/133	202/10654	0.922846	0.9486	0.908162	STX6	1
R-HSA-2262752	Cellular responses to stress	3/133	479/10654	0.94225	0.966298	0.925105	SESN2/ETS1/ATP6V0D1	3
R-HSA-162906	HIV Infection	1/133	233/10654	0.948157	0.966973	0.925752	FYN	1
R-HSA-8953897	Cellular responses to external stimuli	3/133	493/10654	0.949441	0.966973	0.925752	SESN2/ETS1/ATP6V0D1	3
R-HSA-157118	Signaling by NOTCH	1/133	235/10654	0.949472	0.966973	0.925752	ST3GAL6	1
R-HSA-112315	Transmission across Chemical Synapses	1/133	272/10654	0.968614	0.984201	0.942245	ALDH2	1
R-HSA-72766	Translation	1/133	291/10654	0.975439	0.987233	0.945148	MRPL15	1
R-HSA-69620	Cell Cycle Checkpoints	1/133	293/10654	0.976065	0.987233	0.945148	CLASP1	1
R-HSA-983168	Antigen processing: Ubiquitination & Proteasome degradation	1/133	309/10654	0.980538	0.989493	0.947311	SOCS3	1
R-HSA-73894	DNA Repair	1/133	334/10654	0.985922	0.99266	0.950343	BRCA2	1
R-HSA-983169	Class I MHC mediated antigen processing & presentation	1/133	371/10654	0.991296	0.993634	0.951276	SOCS3	1
R-HSA-5663205	Infectious disease	1/133	383/10654	0.992555	0.993634	0.951276	FYN	1
R-HSA-68886	M Phase	1/133	395/10654	0.993634	0.993634	0.951276	CLASP1	1

## Sheet: ETS1
ID	Description	GeneRatio	BgRatio	pvalue	p.adjust	qvalue	geneID	Count
R-HSA-1428517	The citric acid (TCA) cycle and respiratory electron transport	86/1829	174/10654	6.09194e-23	8.25457e-20	7.48987e-20	SDHB/UQCRH/FH/COX20/NDUFB8/NDUFS3/COX8A/NDUFV1/NDUFS8/UCP2/DLAT/SDHD/LDHB/CS/NDUFA12/COX6A1/SUCLA2/DLST/COX5A/IDH3A/IDH2/FAHD1/NDUFB10/UQCRC2/NDUFAB1/PDP2/COX4I1/TACO1/SLC16A3/ME2/NDUFS7/UQCR11/NDUFA11/ECSIT/NDUFB7/NDUFA13/UQCRFS1/COX6B1/NDUFA3/COX7A2L/LRPPRC/SUCLG1/COX5B/COQ10B/NDUFB3/NDUFS1/NDUFA10/IDH3B/NDUFV3/UQCR10/ACO2/NDUFA6/UQCRC1/TIMMDC1/NDUFB5/ETFDH/SDHA/NDUFS6/NNT/NDUFS4/COX7C/UQCRQ/VD…	86
R-HSA-611105	Respiratory electron transport	59/1829	100/10654	4.09634e-21	2.77527e-18	2.51817e-18	SDHB/UQCRH/COX20/NDUFB8/NDUFS3/COX8A/NDUFV1/NDUFS8/SDHD/NDUFA12/COX6A1/COX5A/NDUFB10/UQCRC2/NDUFAB1/COX4I1/TACO1/NDUFS7/UQCR11/NDUFA11/ECSIT/NDUFB7/NDUFA13/UQCRFS1/COX6B1/NDUFA3/COX7A2L/LRPPRC/COX5B/COQ10B/NDUFB3/NDUFS1/NDUFA10/NDUFV3/UQCR10/NDUFA6/UQCRC1/TIMMDC1/NDUFB5/ETFDH/SDHA/NDUFS6/NDUFS4/COX7C/UQCRQ/NDUFA2/NDUFAF4/NDUFA4/CYCS/NDUFA5/NDUFB2/UQCRB/COX6C/NDUFB9/CYC1/NDUFB6/NDUFA8/COX7B/NDUFA1	59
R-HSA-163200	Respiratory electron transport, ATP synthesis by chemiosmotic coupling, and heat production by uncoupling proteins.	61/1829	123/10654	9.94618e-17	4.49236e-14	4.07619e-14	SDHB/UQCRH/COX20/NDUFB8/NDUFS3/COX8A/NDUFV1/NDUFS8/UCP2/SDHD/NDUFA12/COX6A1/COX5A/NDUFB10/UQCRC2/NDUFAB1/COX4I1/TACO1/NDUFS7/UQCR11/NDUFA11/ECSIT/NDUFB7/NDUFA13/UQCRFS1/COX6B1/NDUFA3/COX7A2L/LRPPRC/COX5B/COQ10B/NDUFB3/NDUFS1/NDUFA10/NDUFV3/UQCR10/NDUFA6/UQCRC1/TIMMDC1/NDUFB5/ETFDH/SDHA/NDUFS6/NDUFS4/COX7C/UQCRQ/NDUFA2/SLC25A27/NDUFAF4/NDUFA4/CYCS/NDUFA5/NDUFB2/UQCRB/COX6C/NDUFB9/CYC1/NDUFB6/NDUFA…	61
R-HSA-71403	Citric acid cycle (TCA cycle)	19/1829	22/10654	2.41767e-12	8.18987e-10	7.43117e-10	SDHB/FH/SDHD/CS/SUCLA2/DLST/IDH3A/IDH2/FAHD1/ME2/SUCLG1/IDH3B/ACO2/SDHA/NNT/OGDH/MDH2/DLD/IDH3G	19
R-HSA-5368287	Mitochondrial translation	42/1829	93/10654	2.72251e-10	7.21677e-08	6.54822e-08	AURKAIP1/MRPS21/DAP3/MRPL24/MRPS16/CHCHD1/MRPL11/MRPL21/OXA1L/MRPS34/TUFM/MRPL27/MRPS7/MRPL38/MRPL12/MRPL4/GADD45GIP1/MRPL34/MRPS12/MRPL33/MTIF2/MRPL35/MRPS5/MRPS9/MRPL44/MRPS26/MRPS6/MRPS25/MRPS22/GFM1/MRPL47/MRPL36/MRPS30/MRPS10/MRPL2/MRPS18A/MTRF1L/MRPS33/MRPL15/MRRF/MRPS2/MRPL41	42
R-HSA-6799198	Complex I biogenesis	30/1829	55/10654	3.19562e-10	7.21677e-08	6.54822e-08	NDUFB8/NDUFS3/NDUFV1/NDUFS8/NDUFA12/NDUFB10/NDUFAB1/NDUFS7/NDUFA11/ECSIT/NDUFB7/NDUFA13/NDUFA3/NDUFB3/NDUFS1/NDUFA10/NDUFV3/NDUFA6/TIMMDC1/NDUFB5/NDUFS6/NDUFS4/NDUFA2/NDUFAF4/NDUFA5/NDUFB2/NDUFB9/NDUFB6/NDUFA8/NDUFA1	30
R-HSA-5389840	Mitochondrial translation elongation	39/1829	87/10654	1.53952e-09	2.60757e-07	2.366e-07	AURKAIP1/MRPS21/DAP3/MRPL24/MRPS16/CHCHD1/MRPL11/MRPL21/OXA1L/MRPS34/TUFM/MRPL27/MRPS7/MRPL38/MRPL12/MRPL4/GADD45GIP1/MRPL34/MRPS12/MRPL33/MRPL35/MRPS5/MRPS9/MRPL44/MRPS26/MRPS6/MRPS25/MRPS22/GFM1/MRPL47/MRPL36/MRPS30/MRPS10/MRPL2/MRPS18A/MRPS33/MRPL15/MRPS2/MRPL41	39
R-HSA-5419276	Mitochondrial translation termination	39/1829	87/10654	1.53952e-09	2.60757e-07	2.366e-07	AURKAIP1/MRPS21/DAP3/MRPL24/MRPS16/CHCHD1/MRPL11/MRPL21/OXA1L/MRPS34/MRPL27/MRPS7/MRPL38/MRPL12/MRPL4/GADD45GIP1/MRPL34/MRPS12/MRPL33/MRPL35/MRPS5/MRPS9/MRPL44/MRPS26/MRPS6/MRPS25/MRPS22/MRPL47/MRPL36/MRPS30/MRPS10/MRPL2/MRPS18A/MTRF1L/MRPS33/MRPL15/MRRF/MRPS2/MRPL41	39
R-HSA-5368286	Mitochondrial translation initiation	38/1829	87/10654	6.09553e-09	9.17716e-07	8.327e-07	AURKAIP1/MRPS21/DAP3/MRPL24/MRPS16/CHCHD1/MRPL11/MRPL21/OXA1L/MRPS34/MRPL27/MRPS7/MRPL38/MRPL12/MRPL4/GADD45GIP1/MRPL34/MRPS12/MRPL33/MTIF2/MRPL35/MRPS5/MRPS9/MRPL44/MRPS26/MRPS6/MRPS25/MRPS22/MRPL47/MRPL36/MRPS30/MRPS10/MRPL2/MRPS18A/MRPS33/MRPL15/MRPS2/MRPL41	38
R-HSA-71406	Pyruvate metabolism and Citric Acid (TCA) cycle	28/1829	55/10654	9.74999e-09	1.32112e-06	1.19874e-06	SDHB/FH/DLAT/SDHD/LDHB/CS/SUCLA2/DLST/IDH3A/IDH2/FAHD1/PDP2/SLC16A3/ME2/SUCLG1/IDH3B/ACO2/SDHA/NNT/VDAC1/GLO1/MPC1/OGDH/MDH2/DLD/PDP1/RXRA/IDH3G	28
R-HSA-6798695	Neutrophil degranulation	129/1829	480/10654	3.34558e-08	4.12115e-06	3.73937e-06	KCNAB2/CDA/FUCA1/FGR/PTAFR/PGM1/AGL/PSMA5/CD58/FCER1G/FCGR2A/PRDX6/QSOX1/ARL8A/TMEM63A/C1orf35/ALOX5/PLAU/TSPAN14/PGAM1/PSMD13/CTSD/CAT/CD44/CTSC/PTPN6/C3AR1/MGST1/LRMP/ANO6/BIN2/GPR84/CD63/GNS/LTA4H/APAF1/HVCN1/HMGB1/LAMP1/PNP/LGALS3/ATP8B4/SLC27A2/RAB27A/ADAM10/PLEKHO2/PKM/CTSH/ANPEP/MMP25/HMOX2/MVP/ITGAL/PYCARD/ITGAM/ITGAX/PSMD7/CRISPLD2/P2RX1/ORMDL3/PSMD3/JUP/GHDC/CD300A/RAB37/TMC6/TIMP2/RAB3…	129
R-HSA-449147	Signaling by Interleukins	121/1829	461/10654	3.61846e-07	4.08585e-05	3.70734e-05	RPS6KA1/PTAFR/CSF3R/PSMA5/MCL1/MUC1/POU2F1/PTPN7/MAPKAPK2/PTPN14/ARF1/VIM/ZEB1/HNRNPF/ALOX5/NFKB2/PDCD4/PSMD13/PSMA1/CCND1/IL10RA/CBL/PTPN6/IL23A/STAT2/IRAK3/UBE2N/SOCS2/HSP90B1/HMGB1/LCP1/NFKBIA/FOS/RPS6KA5/AKT1/SMAD3/SOCS1/IL4R/MAPK3/ITGAM/ITGAX/NOD2/PSMD7/PITPNA/MAP2K3/LGALS9/CCL2/CCL4/PSMB3/PSMD3/STAT5B/STAT5A/PSME3/DUSP3/PSMC5/MAP2K6/SOCS3/P4HB/YES1/PTPN2/BCL2/CNN2/EBI3/VAV1/FCER2/ICAM1/TYK2…	121
R-HSA-1268020	Mitochondrial protein import	27/1829	64/10654	2.1763e-06	0.000226838	0.000205824	MTX1/TIMM17A/COA6/NDUFB8/TIMM10/COA4/CS/TIMM21/TIMM13/TIMM44/TIMM50/TOMM40/SLC25A12/MTX2/HSPD1/CHCHD10/TOMM22/ACO2/SAMM50/CHCHD4/SLC25A4/VDAC1/HSPA9/CYC1/FXN/IDH3G/TAZ	27
R-HSA-2871809	FCERI mediated Ca+2 mobilization	17/1829	33/10654	6.55863e-06	0.000634781	0.000575976	VAV3/FCER1G/ITPR2/CALM2/CALM1/LAT/NFATC3/PLCG2/NFATC1/VAV1/CALM3/PLCG1/ITPR1/PPP3CA/LCP2/LYN/SYK	17
R-HSA-877300	Interferon gamma signaling	33/1829	92/10654	1.19961e-05	0.00108365	0.000983258	PTAFR/TRIM45/TRIM46/CAMK2G/TRIM8/IRF7/TRIM5/TRIM22/CD44/NCAM1/PTPN6/OAS3/OAS2/IRF9/CIITA/SOCS1/MT2A/TRIM25/SOCS3/PTPN2/ICAM1/STAT1/SP100/IFNGR2/CAMK2D/TRIM2/IRF2/IRF1/TRIM26/HLA-DRA/IRF5/TRIM35/TRIM14	33
R-HSA-983695	Antigen activates B Cell Receptor (BCR) leading to generation of second messengers	16/1829	32/10654	2.00438e-05	0.00169746	0.00154021	PIK3AP1/PTPN6/ITPR2/CALM2/CALM1/PLCG2/CD79B/VAV1/CALM3/ITPR1/DAPP1/FYN/ORAI2/LYN/SYK/SH3KBP1	16
R-HSA-166016	Toll Like Receptor 4 (TLR4) Cascade	41/1829	129/10654	3.2871e-05	0.00262001	0.00237729	RPS6KA1/DNM3/IKBKE/MAPKAPK2/NFKB2/IRF7/IRAK3/UBE2N/HMGB1/RIPK3/NFKBIA/FOS/RPS6KA5/TRAF3/SOCS1/MAPK3/ITGAM/NOD2/PLCG2/MAP2K3/DUSP3/MAP2K6/ECSIT/VRK3/PPP2R1A/ATF2/ITGB2/MAPK11/DUSP7/TLR2/CD180/CD14/TAB2/CD36/CUL1/DUSP4/LY96/RIPK2/RPS6KA3/ELK1/IRAK1	41
R-HSA-166058	MyD88:MAL(TIRAP) cascade initiated on plasma membrane	32/1829	95/10654	6.76235e-05	0.00482262	0.00437586	RPS6KA1/MAPKAPK2/NFKB2/IRAK3/UBE2N/HMGB1/NFKBIA/FOS/RPS6KA5/SOCS1/MAPK3/NOD2/MAP2K3/DUSP3/MAP2K6/ECSIT/VRK3/PPP2R1A/ATF2/MAPK11/DUSP7/TLR2/CD14/TAB2/CD36/CUL1/DUSP4/LY96/RIPK2/RPS6KA3/ELK1/IRAK1	32
R-HSA-168188	Toll Like Receptor TLR6:TLR2 Cascade	32/1829	95/10654	6.76235e-05	0.00482262	0.00437586	RPS6KA1/MAPKAPK2/NFKB2/IRAK3/UBE2N/HMGB1/NFKBIA/FOS/RPS6KA5/SOCS1/MAPK3/NOD2/MAP2K3/DUSP3/MAP2K6/ECSIT/VRK3/PPP2R1A/ATF2/MAPK11/DUSP7/TLR2/CD14/TAB2/CD36/CUL1/DUSP4/LY96/RIPK2/RPS6KA3/ELK1/IRAK1	32
R-HSA-168179	Toll Like Receptor TLR1:TLR2 Cascade	32/1829	98/10654	0.000132206	0.00853042	0.00774017	RPS6KA1/MAPKAPK2/NFKB2/IRAK3/UBE2N/HMGB1/NFKBIA/FOS/RPS6KA5/SOCS1/MAPK3/NOD2/MAP2K3/DUSP3/MAP2K6/ECSIT/VRK3/PPP2R1A/ATF2/MAPK11/DUSP7/TLR2/CD14/TAB2/CD36/CUL1/DUSP4/LY96/RIPK2/RPS6KA3/ELK1/IRAK1	32
R-HSA-181438	Toll Like Receptor 2 (TLR2) Cascade	32/1829	98/10654	0.000132206	0.00853042	0.00774017	RPS6KA1/MAPKAPK2/NFKB2/IRAK3/UBE2N/HMGB1/NFKBIA/FOS/RPS6KA5/SOCS1/MAPK3/NOD2/MAP2K3/DUSP3/MAP2K6/ECSIT/VRK3/PPP2R1A/ATF2/MAPK11/DUSP7/TLR2/CD14/TAB2/CD36/CUL1/DUSP4/LY96/RIPK2/RPS6KA3/ELK1/IRAK1	32
R-HSA-983705	Signaling by the B Cell Receptor (BCR)	35/1829	112/10654	0.000175587	0.0108146	0.00981273	PSMA5/PIK3AP1/PSMD13/PSMA1/PTPN6/ITPR2/NFKBIA/CALM2/CALM1/NFATC3/PSMD7/PLCG2/PSMB3/PSMD3/PSME3/PSMC5/CD79B/NFATC1/VAV1/PSMC4/CALM3/PSMD1/FKBP1A/ITPR1/PSMD2/DAPP1/PPP3CA/FYN/PSMB1/CARD11/ORAI2/CUL1/LYN/SYK/SH3KBP1	35
R-HSA-982772	Growth hormone receptor signaling	12/1829	24/10654	0.000222646	0.0131167	0.0119016	PTPN6/SOCS2/SOCS1/SH2B1/MAPK3/STAT5B/STAT5A/SOCS3/STAT1/IRS1/GHR/LYN	12
R-HSA-5607764	CLEC7A (Dectin-1) signaling	32/1829	101/10654	0.000247483	0.0139725	0.0126781	PSMA5/NFKB2/PSMD13/PSMA1/ITPR2/UBE2N/NFKBIA/CALM2/CALM1/PYCARD/NFATC3/PSMD7/PLCG2/PSMB3/PSMD3/PSME3/PSMC5/NFATC1/PSMC4/CALM3/UBE2M/IL1B/PSMD1/ITPR1/PSMD2/PPP3CA/TAB2/PSMB1/CARD11/CUL1/SYK/CARD9	32
R-HSA-450282	MAPK targets/ Nuclear events mediated by MAP kinases	14/1829	31/10654	0.000263421	0.0142774	0.0129548	RPS6KA1/MAPKAPK2/FOS/RPS6KA5/MAPK3/DUSP3/VRK3/PPP2R1A/ATF2/MAPK11/DUSP7/DUSP4/RPS6KA3/ELK1	14
R-HSA-373755	Semaphorin interactions	23/1829	65/10654	0.000306942	0.0159964	0.0145145	ARHGEF11/RND1/MYL6/PLXNC1/FES/MYH10/CDK5R1/MYL12A/PIP5K1C/MYH14/ROCK2/PLXNB1/PLXNA1/SEMA6A/DPYSL3/HSP90AB1/FYN/LIMK1/SEMA3A/PLXNA4/DPYSL2/SEMA4D/PLXNA3	23
R-HSA-191273	Cholesterol biosynthesis	12/1829	25/10654	0.000361642	0.0162957	0.0147861	FDPS/ARV1/IDI2/IDI1/MVD/LSS/MSMO1/HMGCS1/HMGCR/ACAT2/FDFT1/SQLE	12
R-HSA-198725	Nuclear Events (kinase and transcription factor activation)	12/1829	25/10654	0.000361642	0.0162957	0.0147861	RPS6KA1/MAPKAPK2/RPS6KA5/MAPK3/DUSP3/VRK3/PPP2R1A/MAPK11/DUSP7/DUSP4/RPS6KA3/ELK1	12
R-HSA-194840	Rho GTPase cycle	40/1829	138/10654	0.000373281	0.0162957	0.0147861	ARHGEF16/ARHGEF10L/SYDE2/VAV3/ARHGEF2/ARHGEF11/OBSCN/ARHGAP12/DEPDC7/ARHGEF17/ARHGDIB/FGD4/ARHGEF40/MYO9A/RHOT2/ARHGAP23/RAC3/TRIP10/VAV1/MYO9B/ARHGAP33/PLEKHG2/ARHGEF1/RHOQ/ARHGAP15/PREX1/ITSN1/RAC2/ARHGEF3/RHOH/ARHGAP24/FAM13B/ARAP3/ARHGAP26/TIAM2/TAGAP/CHN2/ARHGEF10/FGD3/ARHGAP4	40
R-HSA-166166	MyD88-independent TLR4 cascade	31/1829	99/10654	0.000387015	0.0162957	0.0147861	RPS6KA1/IKBKE/MAPKAPK2/NFKB2/IRF7/UBE2N/HMGB1/RIPK3/NFKBIA/FOS/RPS6KA5/TRAF3/MAPK3/NOD2/MAP2K3/DUSP3/MAP2K6/VRK3/PPP2R1A/ATF2/MAPK11/DUSP7/CD14/TAB2/CUL1/DUSP4/LY96/RIPK2/RPS6KA3/ELK1/IRAK1	31
R-HSA-937061	TRIF(TICAM1)-mediated TLR4 signaling	31/1829	99/10654	0.000387015	0.0162957	0.0147861	RPS6KA1/IKBKE/MAPKAPK2/NFKB2/IRF7/UBE2N/HMGB1/RIPK3/NFKBIA/FOS/RPS6KA5/TRAF3/MAPK3/NOD2/MAP2K3/DUSP3/MAP2K6/VRK3/PPP2R1A/ATF2/MAPK11/DUSP7/CD14/TAB2/CUL1/DUSP4/LY96/RIPK2/RPS6KA3/ELK1/IRAK1	31
R-HSA-2454202	Fc epsilon receptor (FCERI) signaling	39/1829	134/10654	0.000401231	0.0162957	0.0147861	VAV3/PSMA5/FCER1G/PSMD13/PSMA1/ITPR2/UBE2N/NFKBIA/FOS/CALM2/CALM1/LAT/MAPK3/NFATC3/PSMD7/PLCG2/PSMB3/PSMD3/PSME3/PSMC5/NFATC1/VAV1/RASGRP4/PSMC4/CALM3/PSMD1/PLCG1/ITPR1/PSMD2/PPP3CA/LCP2/FYN/TAB2/PSMB1/CARD11/LAT2/CUL1/LYN/SYK	39
R-HSA-1592230	Mitochondrial biogenesis	30/1829	95/10654	0.000406362	0.0162957	0.0147861	DNAJC11/MTX1/MEF2D/PPRC1/ESRRA/PRKAB1/SIRT4/CALM2/CALM1/IDH2/TMEM11/POLRMT/CRTC1/CALM3/IMMT/ATF2/MTX2/ACSS2/HELZ2/GABPA/SAMM50/MAPK11/CAMK4/HSPA9/PPARGC1B/SOD2/CYCS/RXRA/TBL1X/APOO	30
R-HSA-198753	ERK/MAPK targets	11/1829	22/10654	0.000408896	0.0162957	0.0147861	RPS6KA1/RPS6KA5/MAPK3/DUSP3/VRK3/PPP2R1A/MAPK11/DUSP7/DUSP4/RPS6KA3/ELK1	11
R-HSA-5607763	CLEC7A (Dectin-1) induces NFAT activation	8/1829	13/10654	0.000421955	0.0163357	0.0148223	ITPR2/CALM2/CALM1/NFATC3/NFATC1/CALM3/ITPR1/PPP3CA	8
R-HSA-399956	CRMPs in Sema3A signaling	9/1829	16/10654	0.000455752	0.017154	0.0155649	FES/CDK5R1/PLXNA1/DPYSL3/FYN/SEMA3A/PLXNA4/DPYSL2/PLXNA3	9
R-HSA-448424	Interleukin-17 signaling	24/1829	72/10654	0.000628972	0.0209982	0.0190529	RPS6KA1/MAPKAPK2/UBE2N/FOS/RPS6KA5/MAPK3/NOD2/MAP2K3/DUSP3/MAP2K6/VRK3/PPP2R1A/ATF2/IL17RA/MAPK11/IL17RE/DUSP7/TAB2/CUL1/DUSP4/RIPK2/RPS6KA3/ELK1/IRAK1	24
R-HSA-168181	Toll Like Receptor 7/8 (TLR7/8) Cascade	29/1829	93/10654	0.000634929	0.0209982	0.0190529	RPS6KA1/MAPKAPK2/NFKB2/IRF7/UBE2N/HMGB1/NFKBIA/FOS/RPS6KA5/MAPK3/NOD2/MAP2K3/DUSP3/MAP2K6/ECSIT/VRK3/PPP2R1A/ATF2/MAPK11/DUSP7/CD14/TAB2/CUL1/DUSP4/LY96/RIPK2/RPS6KA3/ELK1/IRAK1	29
R-HSA-975155	MyD88 dependent cascade initiated on endosome	29/1829	93/10654	0.000634929	0.0209982	0.0190529	RPS6KA1/MAPKAPK2/NFKB2/IRF7/UBE2N/HMGB1/NFKBIA/FOS/RPS6KA5/MAPK3/NOD2/MAP2K3/DUSP3/MAP2K6/ECSIT/VRK3/PPP2R1A/ATF2/MAPK11/DUSP7/CD14/TAB2/CUL1/DUSP4/LY96/RIPK2/RPS6KA3/ELK1/IRAK1	29
R-HSA-168898	Toll-like Receptor Cascades	43/1829	155/10654	0.000640513	0.0209982	0.0190529	RPS6KA1/DNM3/IKBKE/MAPKAPK2/NFKB2/IRF7/IRAK3/UBE2N/HSP90B1/HMGB1/RIPK3/NFKBIA/FOS/RPS6KA5/TRAF3/SOCS1/MAPK3/ITGAM/NOD2/PLCG2/MAP2K3/DUSP3/MAP2K6/ECSIT/VRK3/PPP2R1A/ATF2/ITGB2/MAPK11/DUSP7/TLR2/CD180/CD14/TAB2/CD36/CUL1/CTSB/DUSP4/LY96/RIPK2/RPS6KA3/ELK1/IRAK1	43
R-HSA-2151201	Transcriptional activation of mitochondrial biogenesis	20/1829	56/10654	0.000648556	0.0209982	0.0190529	MEF2D/PPRC1/ESRRA/SIRT4/CALM2/CALM1/IDH2/POLRMT/CRTC1/CALM3/ATF2/ACSS2/HELZ2/GABPA/CAMK4/PPARGC1B/SOD2/CYCS/RXRA/TBL1X	20
R-HSA-450294	MAP kinase activation	22/1829	64/10654	0.000650867	0.0209982	0.0190529	RPS6KA1/MAPKAPK2/UBE2N/FOS/RPS6KA5/MAPK3/NOD2/MAP2K3/DUSP3/MAP2K6/VRK3/PPP2R1A/ATF2/MAPK11/DUSP7/TAB2/CUL1/DUSP4/RIPK2/RPS6KA3/ELK1/IRAK1	22
R-HSA-9006934	Signaling by Receptor Tyrosine Kinases	108/1829	473/10654	0.000748852	0.0226874	0.0205856	MTOR/STMN1/RPS6KA1/ATP6V0B/COL24A1/VAV3/APH1A/DNM3/LAMC1/MAPKAPK2/LAMB3/PSEN2/HNRNPF/PDE3B/FLRT1/PGR/CBL/PTPN6/ITPR2/PXN/ARF6/CALM2/CALM1/RPS6KA5/AKT1/ADAM10/MAP2K5/FURIN/FES/PCSK6/SOCS1/MAPK3/ATP6V0D1/BCAR1/WWOX/CDK5R1/JUP/STAT5B/STAT5A/DUSP3/COL1A1/BAIAP2/YES1/PTPN2/POLR2E/MATK/PTPRS/GTF2F1/VAV1/INSR/PRKACA/AXL/CALM3/VRK3/PPP2R1A/EPN1/ROCK2/PRKCE/SPRED2/NCK2/STAT1/IRS1/ITCH/PLCG1/MMP9/PTK6/COL6…	108
R-HSA-2025928	Calcineurin activates NFAT	7/1829	11/10654	0.000752954	0.0226874	0.0205856	CALM2/CALM1/NFATC3/NFATC1/CALM3/FKBP1A/PPP3CA	7
R-HSA-8978934	Metabolism of cofactors	10/1829	20/10654	0.000753456	0.0226874	0.0205856	PDSS1/COQ6/CALM2/CALM1/AKT1/COQ9/CALM3/SPR/IDH1/COQ3	10
R-HSA-168164	Toll Like Receptor 3 (TLR3) Cascade	29/1829	94/10654	0.000770267	0.0226894	0.0205875	RPS6KA1/IKBKE/MAPKAPK2/NFKB2/IRF7/UBE2N/HMGB1/RIPK3/NFKBIA/FOS/RPS6KA5/TRAF3/MAPK3/NOD2/MAP2K3/DUSP3/MAP2K6/VRK3/PPP2R1A/ATF2/MAPK11/DUSP7/TAB2/CUL1/DUSP4/RIPK2/RPS6KA3/ELK1/IRAK1	29
R-HSA-399955	SEMA3A-Plexin repulsion signaling by inhibiting Integrin adhesion	8/1829	14/10654	0.000836577	0.0231339	0.0209908	RND1/FES/PIP5K1C/PLXNA1/FYN/SEMA3A/PLXNA4/PLXNA3	8
R-HSA-9005891	Loss of function of MECP2 in Rett syndrome	8/1829	14/10654	0.000836577	0.0231339	0.0209908	NCOR2/CALM2/CALM1/GPS2/PRKACA/CALM3/CAMK4/TBL1X	8
R-HSA-9005895	Pervasive developmental disorders	8/1829	14/10654	0.000836577	0.0231339	0.0209908	NCOR2/CALM2/CALM1/GPS2/PRKACA/CALM3/CAMK4/TBL1X	8
R-HSA-5628897	TP53 Regulates Metabolic Genes	27/1829	86/10654	0.000856697	0.0232165	0.0210657	MTOR/SESN2/RRAGC/COX20/COX8A/TXNRD1/PRKAB1/COX6A1/AKT1/COX5A/COX4I1/TACO1/GPI/COX6B1/COX7A2L/LRPPRC/COX5B/COX7C/RRAGD/SESN1/NDUFA4/CYCS/GSR/COX6C/RRM2B/COX7B/G6PD	27
R-HSA-4420097	VEGFA-VEGFR2 Pathway	30/1829	99/10654	0.000875399	0.0232582	0.0211035	MTOR/VAV3/MAPKAPK2/ITPR2/PXN/CALM2/CALM1/AKT1/BCAR1/JUP/BAIAP2/VAV1/PRKACA/AXL/CALM3/ROCK2/NCK2/PLCG1/NCF4/PRR5/MAPK11/ITPR1/RASA1/CYFIP2/MAPK13/VEGFA/FYN/HSPB1/PTK2/MAPKAP1	30
R-HSA-6785807	Interleukin-4 and Interleukin-13 signaling	32/1829	108/10654	0.000918447	0.0239326	0.0217155	MCL1/MUC1/POU2F1/VIM/ZEB1/ALOX5/CCND1/IL23A/HSP90B1/FOS/AKT1/SOCS1/IL4R/ITGAM/ITGAX/CCL2/SOCS3/BCL2/FCER2/ICAM1/TYK2/IL1B/STAT1/MMP9/ITGB2/OSM/BCL6/VEGFA/FSCN1/CD36/CEBPD/IL2RG	32
R-HSA-1489509	DAG and IP3 signaling	16/1829	42/10654	0.000994279	0.0250604	0.0227388	CAMK2G/ITPR2/PDE1B/ADCY4/CALM2/CALM1/PRKACA/CALM3/ADCY3/PRKCE/PLCG1/ITPR1/PRKAR2A/CAMK2D/CAMK4/ADCY1	16
R-HSA-5339562	Uptake and actions of bacterial toxins	13/1829	31/10654	0.0010326	0.0250604	0.0227388	SYT2/TXNRD1/CALM2/CALM1/FURIN/MAP2K3/MAP2K6/EEF2/CALM3/ANTXR2/HBEGF/HSP90AB1/STX1A	13
R-HSA-5627123	RHO GTPases activate PAKs	11/1829	24/10654	0.00103537	0.0250604	0.0227388	CTTN/MYL6/PPP1R12A/CALM2/CALM1/MYH10/MYL12A/CALM3/MYH14/NF2/LIMK1	11
R-HSA-9609507	Protein localization	44/1829	163/10654	0.00103571	0.0250604	0.0227388	MTX1/TIMM17A/COA6/TYSND1/ATAD1/IDE/NDUFB8/CAT/TIMM10/COA4/CS/SLC27A2/NUDT7/PIPOX/ACOX1/TIMM21/TIMM13/SGTA/TIMM44/TIMM50/TOMM40/OTOF/SLC25A12/MTX2/HSPD1/IDH1/CHCHD10/TOMM22/SLC25A17/ACO2/SAMM50/CHCHD4/SLC25A4/VDAC1/HSPA9/STX1A/GSTK1/EPHX2/GDAP1/CYC1/FXN/CRAT/IDH3G/TAZ	44
R-HSA-975138	TRAF6 mediated induction of NFkB and MAP kinases upon TLR7/8 or 9 activation	28/1829	92/10654	0.00118961	0.0282792	0.0256595	RPS6KA1/MAPKAPK2/NFKB2/UBE2N/HMGB1/NFKBIA/FOS/RPS6KA5/MAPK3/NOD2/MAP2K3/DUSP3/MAP2K6/ECSIT/VRK3/PPP2R1A/ATF2/MAPK11/DUSP7/CD14/TAB2/CUL1/DUSP4/LY96/RIPK2/RPS6KA3/ELK1/IRAK1	28
R-HSA-416572	Sema4D induced cell migration and growth-cone collapse	10/1829	21/10654	0.00121861	0.0284691	0.0258318	ARHGEF11/RND1/MYL6/MYH10/MYL12A/MYH14/ROCK2/PLXNB1/LIMK1/SEMA4D	10
R-HSA-168138	Toll Like Receptor 9 (TLR9) Cascade	29/1829	97/10654	0.00133848	0.0307397	0.027892	RPS6KA1/MAPKAPK2/NFKB2/IRF7/UBE2N/HMGB1/NFKBIA/FOS/RPS6KA5/MAPK3/NOD2/MAP2K3/DUSP3/MAP2K6/ECSIT/VRK3/PPP2R1A/ATF2/MAPK11/DUSP7/CD14/TAB2/CUL1/DUSP4/LY96/RIPK2/RPS6KA3/ELK1/IRAK1	29
R-HSA-193648	NRAGE signals death through JNK	20/1829	59/10654	0.00137279	0.0310021	0.0281301	ARHGEF16/ARHGEF10L/VAV3/ARHGEF2/ARHGEF11/OBSCN/ARHGEF17/FGD4/ARHGEF40/AATF/VAV1/PLEKHG2/ARHGEF1/BCL2L11/PREX1/ITSN1/ARHGEF3/TIAM2/ARHGEF10/FGD3	20
R-HSA-416482	G alpha (12/13) signalling events	25/1829	80/10654	0.00141087	0.0313397	0.0284364	ARHGEF16/ARHGEF10L/GNG5/VAV3/ARHGEF2/ARHGEF11/OBSCN/GNG4/ARHGEF17/FGD4/ARHGEF40/GNB5/GNG7/TBXA2R/VAV1/PLEKHG2/ARHGEF1/ROCK2/PREX1/ITSN1/PLXNB1/ARHGEF3/TIAM2/ARHGEF10/FGD3	25
R-HSA-2029481	FCGR activation	7/1829	12/10654	0.00153958	0.0336472	0.0305301	FGR/FCGR2A/YES1/HCK/FYN/LYN/SYK	7
R-HSA-168142	Toll Like Receptor 10 (TLR10) Cascade	26/1829	85/10654	0.00161714	0.0337111	0.0305881	RPS6KA1/MAPKAPK2/NFKB2/UBE2N/HMGB1/NFKBIA/FOS/RPS6KA5/MAPK3/NOD2/MAP2K3/DUSP3/MAP2K6/ECSIT/VRK3/PPP2R1A/ATF2/MAPK11/DUSP7/TAB2/CUL1/DUSP4/RIPK2/RPS6KA3/ELK1/IRAK1	26
R-HSA-168176	Toll Like Receptor 5 (TLR5) Cascade	26/1829	85/10654	0.00161714	0.0337111	0.0305881	RPS6KA1/MAPKAPK2/NFKB2/UBE2N/HMGB1/NFKBIA/FOS/RPS6KA5/MAPK3/NOD2/MAP2K3/DUSP3/MAP2K6/ECSIT/VRK3/PPP2R1A/ATF2/MAPK11/DUSP7/TAB2/CUL1/DUSP4/RIPK2/RPS6KA3/ELK1/IRAK1	26
R-HSA-975871	MyD88 cascade initiated on plasma membrane	26/1829	85/10654	0.00161714	0.0337111	0.0305881	RPS6KA1/MAPKAPK2/NFKB2/UBE2N/HMGB1/NFKBIA/FOS/RPS6KA5/MAPK3/NOD2/MAP2K3/DUSP3/MAP2K6/ECSIT/VRK3/PPP2R1A/ATF2/MAPK11/DUSP7/TAB2/CUL1/DUSP4/RIPK2/RPS6KA3/ELK1/IRAK1	26
R-HSA-447115	Interleukin-12 family signaling	19/1829	57/10654	0.00223634	0.0454683	0.0412561	ARF1/HNRNPF/PDCD4/IL23A/LCP1/PITPNA/P4HB/CNN2/EBI3/TYK2/IL27RA/STAT1/STAT4/IL6ST/LMNB1/HSPA9/SOD2/RALA/MSN	19
R-HSA-3928664	Ephrin signaling	9/1829	19/10654	0.00224825	0.0454683	0.0412561	GIT1/MYL12A/NCK2/EPHB1/FYN/EPHB4/EPHB6/SDCBP/EFNB1	9
R-HSA-1852241	Organelle biogenesis and maintenance	70/1829	296/10654	0.00242044	0.0482308	0.0437627	DNAJC11/KIF17/MTX1/CCT3/MEF2D/SDCCAG8/PPRC1/ACTR1A/ARL3/ESRRA/C2CD3/DYNC2H1/IFT81/PRKAB1/SIRT4/IFT88/CENPJ/CALM2/CALM1/TTBK2/IDH2/CCP110/TUBB3/TMEM11/POLRMT/TUBB4A/PRKACA/HAUS8/CRTC1/CALM3/PPP2R1A/KIF3C/ALMS1/IMMT/CLASP1/DYNC1I2/ATF2/MTX2/TTC30A/MKKS/ACSS2/HELZ2/GABPA/PCNT/SAMM50/MAPK11/LZTFL1/NPHP3/CEP70/IFT80/WDR19/EXOC1/CEP135/PKD2/PLK4/EXOC3/CAMK4/HSPA9/PPARGC1B/SOD2/FGFR1OP/CYCS/WDR60/ASAP1/…	70
R-HSA-399954	Sema3A PAK dependent Axon repulsion	8/1829	16/10654	0.00259205	0.0502768	0.0456192	FES/PLXNA1/HSP90AB1/FYN/LIMK1/SEMA3A/PLXNA4/PLXNA3	8
R-HSA-5621481	C-type lectin receptors (CLRs)	38/1829	142/10654	0.00259733	0.0502768	0.0456192	PSMA5/MUC1/FCER1G/NFKB2/PSMD13/PSMA1/ITPR2/UBE2N/NFKBIA/CALM2/CALM1/RPS6KA5/PYCARD/NFATC3/PSMD7/PLCG2/PSMB3/PSMD3/PSME3/PSMC5/NFATC1/PRKACA/PSMC4/CALM3/UBE2M/IL1B/PSMD1/ITPR1/PSMD2/PPP3CA/FYN/TAB2/PSMB1/CARD11/CUL1/LYN/SYK/CARD9	38
R-HSA-913531	Interferon Signaling	50/1829	199/10654	0.00265584	0.0506853	0.0459899	ISG15/EIF4G3/PTAFR/TRIM45/TRIM46/CAMK2G/IFIT3/TRIM8/IFITM1/IFITM3/IRF7/TRIM5/TRIM22/CD44/NCAM1/PTPN6/STAT2/UBE2N/OAS3/OAS2/IRF9/IFI27/CIITA/SOCS1/MAPK3/MT2A/NUP93/TRIM25/SOCS3/PTPN2/ICAM1/TYK2/EIF2AK2/STAT1/SP100/PLCG1/IFNGR2/MX1/NUP210/FLNB/CAMK2D/TRIM2/IRF2/IRF1/TRIM26/HLA-DRA/POM121/IRF5/TRIM35/TRIM14	50
R-HSA-6790901	rRNA modification in the nucleus and cytosol	20/1829	62/10654	0.00269474	0.0507134	0.0460154	WDR3/BMS1/PDCD11/NAT10/TRMT112/NOP2/DDX47/KRR1/DHX37/TBL3/UTP6/MPHOSPH10/IMP4/RRP9/NOP14/WDR46/DCAF13/RCL1/NOL6/UTP14A	20
R-HSA-5210891	Uptake and function of anthrax toxins	7/1829	13/10654	0.00284347	0.0527794	0.04789	CALM2/CALM1/FURIN/MAP2K3/MAP2K6/CALM3/ANTXR2	7
R-HSA-194138	Signaling by VEGF	30/1829	107/10654	0.00333267	0.0610239	0.0553707	MTOR/VAV3/MAPKAPK2/ITPR2/PXN/CALM2/CALM1/AKT1/BCAR1/JUP/BAIAP2/VAV1/PRKACA/AXL/CALM3/ROCK2/NCK2/PLCG1/NCF4/PRR5/MAPK11/ITPR1/RASA1/CYFIP2/MAPK13/VEGFA/FYN/HSPB1/PTK2/MAPKAP1	30
R-HSA-71387	Metabolism of carbohydrates	69/1829	295/10654	0.00344943	0.0623198	0.0565465	HSPG2/SLC9A1/SDC3/PGM1/AGL/B4GALT3/PFKFB2/CSGALNACT2/HK1/CHST3/PGAM1/GOT1/CD44/PC/PGM2L1/SLC37A2/ST3GAL4/PFKM/GNS/CHST11/CALM2/CALM1/PKM/MAN2C1/CSPG4/PGP/XYLT1/PHKG2/NUP93/GOT2/ST3GAL2/SLC25A11/NAGLU/PRKACA/PGLS/GPI/CALM3/PPP2R1A/RBKS/MDH1/SLC25A12/B3GNT7/GPC1/SDC4/B4GALT5/NUP210/XYLB/PFKFB4/HYAL3/GLYCTK/TKT/GBE1/ST3GAL6/GYG1/IDUA/MANBA/SLC26A2/NDST1/CHST12/PGAM2/POM121/MDH2/AKR1B1/CHPF2/SDC2/EXT…	69
R-HSA-114604	GPVI-mediated activation cascade	13/1829	35/10654	0.00376757	0.0671718	0.0609491	PDPN/VAV3/FCER1G/PTPN6/LAT/PLCG2/COL1A1/VAV1/RAC2/LCP2/FYN/LYN/SYK	13
R-HSA-2029480	Fcgamma receptor (FCGR) dependent phagocytosis	25/1829	86/10654	0.00420387	0.0739772	0.067124	FGR/VAV3/FCGR2A/ITPR2/MAPK3/PLCG2/BAIAP2/YES1/VAV1/MYO9B/PRKCE/WIPF1/HCK/PLCG1/NF2/ITPR1/PLD1/CYFIP2/HSP90AB1/FYN/LIMK1/LYN/PTK2/SYK/ABL1	25
R-HSA-2682334	EPH-Ephrin signaling	26/1829	92/10654	0.00537367	0.0933503	0.0847024	VAV3/APH1A/PSEN2/MYL6/ADAM10/MYH10/GIT1/YES1/MYL12A/EFNA2/MYH14/ROCK2/NCK2/MMP9/ITSN1/EPHB1/RASA1/FYN/LIMK1/EPHB4/EPHB6/LYN/SDCBP/SDC2/PTK2/EFNB1	26
R-HSA-193704	p75 NTR receptor-mediated signalling	27/1829	97/10654	0.00577002	0.0988856	0.0897249	ARHGEF16/ARHGEF10L/VAV3/APH1A/ARHGEF2/ARHGEF11/PSEN2/OBSCN/ARHGEF17/FGD4/ARHGEF40/NFKBIA/AATF/VAV1/PLEKHG2/ARHGEF1/RTN4/BCL2L11/PREX1/ITSN1/RTN4R/ARHGEF3/TIAM2/ARHGEF10/RIPK2/FGD3/IRAK1	27
R-HSA-400685	Sema4D in semaphorin signaling	10/1829	25/10654	0.00583826	0.0988856	0.0897249	ARHGEF11/RND1/MYL6/MYH10/MYL12A/MYH14/ROCK2/PLXNB1/LIMK1/SEMA4D	10
R-HSA-352230	Amino acid transport across the plasma membrane	12/1829	33/10654	0.0064548	0.107978	0.0979754	SLC6A12/SLC38A2/SLC7A7/SLC25A29/SLC7A5/SLC43A2/SLC1A5/SLC1A4/SLC6A6/SLC7A11/SLC36A1/SLC7A2	12
R-HSA-3700989	Transcriptional Regulation by TP53	81/1829	365/10654	0.00709919	0.11731	0.106442	MTOR/RPA2/SESN2/RRAGC/PLK3/GADD45A/HIPK1/BTG2/SMYD2/EXO1/COX20/AIFM2/E2F8/TNKS1BP1/COX8A/USP2/RHNO1/E2F7/APAF1/TXNRD1/PRKAB1/COX6A1/CENPJ/CCNA1/POU4F1/PRMT5/MNAT1/FOS/AKT1/COX5A/E2F4/COX4I1/BANP/CDK5R1/CDK12/TACO1/MAP2K6/POLR2E/GTF2F1/ELL/GPI/COX6B1/ERCC2/BBC3/PRMT1/PPP2R1A/TP53I3/COX7A2L/LRPPRC/COX5B/CNOT11/STEAP3/ATF2/ING5/BID/PRR5/MAPK11/ATR/BCL6/POU4F2/ING2/TAF9/COX7C/CDC25C/BRPF3/RRAGD/SESN1…	81
R-HSA-204998	Cell death signalling via NRAGE, NRIF and NADE	22/1829	76/10654	0.00737007	0.120319	0.109172	ARHGEF16/ARHGEF10L/VAV3/APH1A/ARHGEF2/ARHGEF11/PSEN2/OBSCN/ARHGEF17/FGD4/ARHGEF40/AATF/VAV1/PLEKHG2/ARHGEF1/BCL2L11/PREX1/ITSN1/ARHGEF3/TIAM2/ARHGEF10/FGD3	22
R-HSA-418360	Platelet calcium homeostasis	11/1829	30/10654	0.00836638	0.134662	0.122187	ATP2B4/ITPR2/ATP2B1/P2RX4/CALM2/CALM1/P2RX1/CALM3/SLC8A1/ITPR1/ORAI2	11
R-HSA-70263	Gluconeogenesis	12/1829	34/10654	0.00844745	0.134662	0.122187	PGAM1/GOT1/PC/SLC37A2/GOT2/SLC25A11/GPI/MDH1/SLC25A12/PGAM2/MDH2/FBP1	12
R-HSA-168643	Nucleotide-binding domain, leucine rich repeat containing receptor (NLR) signaling pathways	17/1829	55/10654	0.00873914	0.137692	0.124936	NLRP3/NFKB2/UBE2N/PSTPIP1/PYCARD/NOD2/MAP2K6/BCL2/ITCH/MAPK11/MAPK13/HSP90AB1/TNFAIP3/TAB2/RIPK2/CARD9/IRAK1	17
R-HSA-111932	CaMK IV-mediated phosphorylation of CREB	6/1829	12/10654	0.00915121	0.140908	0.127854	CAMK2G/CALM2/CALM1/CALM3/CAMK2D/CAMK4	6
R-HSA-8984722	Interleukin-35 Signalling	6/1829	12/10654	0.00915121	0.140908	0.127854	EBI3/TYK2/IL27RA/STAT1/STAT4/IL6ST	6
R-HSA-163615	PKA activation	8/1829	19/10654	0.00939087	0.142973	0.129728	ADCY4/CALM2/CALM1/PRKACA/CALM3/ADCY3/PRKAR2A/ADCY1	8
R-HSA-9607240	FLT3 Signaling	61/1829	267/10654	0.00966165	0.144536	0.131146	PSMA5/PEA15/DUSP10/APBB1IP/RET/CAMK2G/PSMD13/PSMA1/PDE3B/MAP3K11/NCAM1/CALM2/CALM1/MARK3/RASGRF1/LAT/MAPK3/PSMD7/ARRB2/PSMB3/PSMD3/STAT5B/STAT5A/PSME3/PHB/PSMC5/RASGRP4/PSMC4/PPP5C/CALM3/GRIN2D/PPP2R1A/SPRED2/IRS1/PSMD1/HCK/CSF2RB/PDGFB/DUSP7/IL17RD/PSMD2/FGFR3/PDGFRA/KIT/CAMK2D/GAB1/RASA1/NRG2/HBEGF/FGFR4/SYNGAP1/FYN/PSMB1/PDGFA/GFRA2/DUSP4/FGFR1/PTK2/DAB2IP/ARAF/IL2RG	61
R-HSA-76002	Platelet activation, signaling and aggregation	60/1829	262/10654	0.00970682	0.144536	0.131146	PDPN/GNG5/VAV3/ECM1/TAGLN2/FCER1G/QSOX1/GNG4/APBB1IP/SRGN/ADRA2A/NHLRC2/PTPN6/ITPR2/CD63/ABCC4/GAS6/PRKCH/CALM2/CALM1/AKT1/GNB5/LAT/MAPK3/BCAR1/PLCG2/ARRB2/COL1A1/GNG7/GNA15/TBXA2R/VAV1/ACTN4/CALM3/PRKCE/PLEK/RAC2/PDGFB/ITPR1/TEX264/TF/DGKG/PCDH7/LHFPL2/PCYOX1L/LCP2/BRPF3/VEGFA/CD109/FYN/PDGFA/GNAI1/CD36/SERPINE1/LYN/PTK2/SYK/ORM1/TMSB4X/LAMP2	60
R-HSA-1433559	Regulation of KIT signaling	7/1829	16/10654	0.0117813	0.171652	0.155751	CBL/PTPN6/SOCS1/YES1/KIT/FYN/LYN	7
R-HSA-1660516	Synthesis of PIPs at the early endosome membrane	7/1829	16/10654	0.0117813	0.171652	0.155751	PI4K2A/MTMR4/INPP4A/INPP4B/MTMR12/FIG4/MTM1	7
R-HSA-5684996	MAPK1/MAPK3 signaling	58/1829	255/10654	0.0125008	0.180198	0.163504	PSMA5/PEA15/DUSP10/APBB1IP/RET/CAMK2G/PSMD13/PSMA1/MAP3K11/NCAM1/CALM2/CALM1/MARK3/RASGRF1/LAT/MAPK3/PSMD7/ARRB2/PSMB3/PSMD3/PSME3/PHB/PSMC5/TYK2/RASGRP4/PSMC4/PPP5C/CALM3/GRIN2D/PPP2R1A/SPRED2/IRS1/PSMD1/CSF2RB/PDGFB/DUSP7/IL17RD/PSMD2/FGFR3/PDGFRA/KIT/CAMK2D/IL6ST/RASA1/NRG2/HBEGF/FGFR4/SYNGAP1/FYN/PSMB1/PDGFA/GFRA2/DUSP4/FGFR1/PTK2/DAB2IP/ARAF/IL2RG	58
R-HSA-73887	Death Receptor Signalling	35/1829	141/10654	0.0129308	0.183099	0.166137	ARHGEF16/ARHGEF10L/VAV3/APH1A/ARHGEF2/ARHGEF11/PSEN2/OBSCN/ARHGEF17/USP2/FGD4/ARHGEF40/RNF31/NFKBIA/AATF/VAV1/CLIP3/PLEKHG2/ARHGEF1/RTN4/BCL2L11/CFLAR/PREX1/ITSN1/RTN4R/ARHGEF3/TNFSF10/TNFAIP3/TAB2/TIAM2/ARHGEF10/TNFRSF10B/RIPK2/FGD3/IRAK1	35
R-HSA-1989781	PPARA activates gene expression	30/1829	117/10654	0.0129723	0.183099	0.166137	G0S2/NR1H3/ESRRA/CPT1A/TXNRD1/MED13L/NCOR2/GPS2/SREBF1/ACOX1/SLC27A1/MED29/HELZ2/PPARG/ACSL1/HMGCS1/HMGCR/PPARGC1B/TNFRSF21/CDK19/TIAM2/AHR/CD36/ABCB4/FDFT1/ABCA1/MED27/RXRA/TBL1X/MED12	30
R-HSA-111933	Calmodulin induced events	12/1829	36/10654	0.0138406	0.187866	0.170462	CAMK2G/PDE1B/ADCY4/CALM2/CALM1/PRKACA/CALM3/ADCY3/PRKAR2A/CAMK2D/CAMK4/ADCY1	12
R-HSA-111997	CaM pathway	12/1829	36/10654	0.0138406	0.187866	0.170462	CAMK2G/PDE1B/ADCY4/CALM2/CALM1/PRKACA/CALM3/ADCY3/PRKAR2A/CAMK2D/CAMK4/ADCY1	12
R-HSA-450302	activated TAK1 mediates p38 MAPK activation	9/1829	24/10654	0.014113	0.187866	0.170462	MAPKAPK2/UBE2N/NOD2/MAP2K3/MAP2K6/MAPK11/TAB2/RIPK2/IRAK1	9
R-HSA-9634638	Estrogen-dependent nuclear events downstream of ESR-membrane signaling	9/1829	24/10654	0.014113	0.187866	0.170462	CCND1/FOS/AKT1/MAPK3/BCL2/XPO1/HBEGF/PTK2/ELK1	9
R-HSA-202733	Cell surface interactions at the vascular wall	34/1829	137/10654	0.0141825	0.187866	0.170462	SDC3/CD58/CD244/FCER1G/CD44/PTPN6/ITGA5/SELPLG/GAS6/SLC7A7/SPN/ITGAL/ITGAM/ITGAX/SLC7A5/COL1A1/SLC16A3/YES1/ITGA6/ITGA4/GPC1/THBD/PLCG1/SDC4/ITGB2/CD47/SLC7A11/CD74/TREM1/FYN/TNFRSF10B/LYN/SDC2/CD99L2	34
R-HSA-2871796	FCERI mediated MAPK activation	11/1829	32/10654	0.0142157	0.187866	0.170462	VAV3/FCER1G/FOS/LAT/MAPK3/PLCG2/VAV1/PLCG1/LCP2/LYN/SYK	11
R-HSA-202670	ERKs are inactivated	6/1829	13/10654	0.0145578	0.187866	0.170462	MAPK3/DUSP3/VRK3/PPP2R1A/DUSP7/DUSP4	6
R-HSA-203615	eNOS activation	6/1829	13/10654	0.0145578	0.187866	0.170462	CALM2/CALM1/AKT1/CALM3/SPR/DDAH2	6
R-HSA-75205	Dissolution of Fibrin Clot	6/1829	13/10654	0.0145578	0.187866	0.170462	S100A10/PLAU/SERPINB8/SERPINB6/SERPINE1/PLAT	6
R-HSA-5663202	Diseases of signal transduction	81/1829	377/10654	0.0159243	0.202013	0.183299	MTOR/AGTRAP/HEYL/PSMA5/APH1A/LMNA/PSEN2/APBB1IP/CAMK2G/PIK3AP1/CTBP2/PSMD13/PSMA1/SYVN1/MAP3K11/CBL/OS9/NCOR2/CALM2/CALM1/MARK3/AKT1/ADAM10/SMAD3/MAPK3/PSMD7/ARRB2/PSMB3/PSMD3/STAT5B/STAT5A/PSME3/PHB/PSMC5/POLR2E/GTF2F1/VAV1/PSMC4/CALM3/PPP2R1A/BCL2L11/STAT1/IRS1/PSMD1/LRRFIP1/FKBP1A/JAG1/PLCG1/RAC2/PDGFB/PRR5/TRAK1/PSMD2/FGFR3/RBPJ/PDGFRA/KIT/DKK2/CAMK2D/GAB1/NRG2/HBEGF/NEURL1B/FGFR4/MAML1/FYN/F…	81
R-HSA-5683057	MAPK family signaling cascades	65/1829	294/10654	0.0159523	0.202013	0.183299	CDC14A/PSMA5/PEA15/DUSP10/APBB1IP/RET/CAMK2G/PSMD13/PSMA1/MAP3K11/NCAM1/CALM2/CALM1/MARK3/MAPK6/RASGRF1/LAT/MAPK3/PSMD7/ARRB2/PSMB3/PSMD3/PSME3/PHB/PSMC5/TYK2/PRKACA/RASGRP4/PSMC4/PPP5C/CALM3/GRIN2D/PPP2R1A/CDC42EP3/XPO1/SPRED2/IRS1/PSMD1/CSF2RB/PDGFB/DUSP7/IL17RD/PSMD2/FGFR3/PDGFRA/KIT/CAMK2D/IL6ST/RASA1/NRG2/HBEGF/FGFR4/SYNGAP1/CCND3/FYN/PSMB1/PDGFA/HSPB1/GFRA2/DUSP4/FGFR1/PTK2/DAB2IP/ARAF/IL2RG	65
R-HSA-112043	PLC beta mediated events	16/1829	54/10654	0.0164095	0.204209	0.185292	CAMK2G/ITPR2/PDE1B/ADCY4/CALM2/CALM1/PLCB2/PRKACA/CALM3/ADCY3/ITPR1/PRKAR2A/CAMK2D/CAMK4/ADCY1/GNAI1	16
R-HSA-400206	Regulation of lipid metabolism by Peroxisome proliferator-activated receptor alpha (PPARalpha)	30/1829	119/10654	0.0164272	0.204209	0.185292	G0S2/NR1H3/ESRRA/CPT1A/TXNRD1/MED13L/NCOR2/GPS2/SREBF1/ACOX1/SLC27A1/MED29/HELZ2/PPARG/ACSL1/HMGCS1/HMGCR/PPARGC1B/TNFRSF21/CDK19/TIAM2/AHR/CD36/ABCB4/FDFT1/ABCA1/MED27/RXRA/TBL1X/MED12	30
R-HSA-9006925	Intracellular signaling by second messengers	67/1829	305/10654	0.0167456	0.206275	0.187166	MTOR/PHC2/RRAGC/PSMA5/PIP5K1A/BMI1/CAMK2G/PIK3AP1/PSMD13/PSMA1/ITPR2/PDE1B/ADCY4/CALM2/CALM1/RCOR1/AKT1/MAPK3/PSMD7/PSMB3/PSMD3/PSME3/PSMC5/CBX2/PIP5K1C/VAV1/INSR/PRKACA/PSMC4/CALM3/PPP2R1A/ADCY3/PRKCE/ATF2/IRS1/PSMD1/PLCG1/SNAI1/RAC2/CBX6/PDGFB/PRR5/ITPR1/PPARG/PRKAR2A/PSMD2/IL1RAP/FGFR3/PDGFRA/KIT/CAMK2D/GAB1/CAMK4/NRG2/HBEGF/FGFR4/TRIM27/RRAGD/FYN/PSMB1/PDGFA/ADCY1/FGFR1/PIP5K1B/MAPKAP1/FOXO4/…	67
R-HSA-70221	Glycogen breakdown (glycogenolysis)	7/1829	17/10654	0.0171121	0.206591	0.187452	AGL/PGM2L1/CALM2/CALM1/PHKG2/CALM3/GYG1	7
R-HSA-5673001	RAF/MAP kinase cascade	56/1829	249/10654	0.0173533	0.206591	0.187452	PSMA5/PEA15/DUSP10/APBB1IP/RET/CAMK2G/PSMD13/PSMA1/MAP3K11/NCAM1/CALM2/CALM1/MARK3/RASGRF1/LAT/MAPK3/PSMD7/ARRB2/PSMB3/PSMD3/PSME3/PHB/PSMC5/RASGRP4/PSMC4/PPP5C/CALM3/GRIN2D/PPP2R1A/SPRED2/IRS1/PSMD1/CSF2RB/PDGFB/DUSP7/IL17RD/PSMD2/FGFR3/PDGFRA/KIT/CAMK2D/RASA1/NRG2/HBEGF/FGFR4/SYNGAP1/FYN/PSMB1/PDGFA/GFRA2/DUSP4/FGFR1/PTK2/DAB2IP/ARAF/IL2RG	56
R-HSA-442729	CREB1 phosphorylation through the activation of CaMKII/CaMKK/CaMKIV cascasde	5/1829	10/10654	0.0174582	0.206591	0.187452	CAMK2G/CALM2/CALM1/CALM3/CAMK4	5
R-HSA-9020958	Interleukin-21 signaling	5/1829	10/10654	0.0174582	0.206591	0.187452	STAT5B/STAT5A/STAT1/STAT4/IL2RG	5
R-HSA-70326	Glucose metabolism	24/1829	91/10654	0.0175335	0.206591	0.187452	PFKFB2/HK1/PGAM1/GOT1/PC/PGM2L1/SLC37A2/PFKM/PKM/PGP/NUP93/GOT2/SLC25A11/PRKACA/GPI/PPP2R1A/MDH1/SLC25A12/NUP210/PFKFB4/PGAM2/POM121/MDH2/FBP1	24
R-HSA-9022692	Regulation of MECP2 expression and activity	11/1829	33/10654	0.0180961	0.210129	0.190663	CAMK2G/NCOR2/CALM2/CALM1/GPS2/PRKACA/CALM3/HTT/CAMK2D/CAMK4/TBL1X	11
R-HSA-111931	PKA-mediated phosphorylation of CREB	8/1829	21/10654	0.018369	0.210129	0.190663	ADCY4/CALM2/CALM1/PRKACA/CALM3/ADCY3/PRKAR2A/ADCY1	8
R-HSA-5218921	VEGFR2 mediated cell proliferation	8/1829	21/10654	0.018369	0.210129	0.190663	ITPR2/CALM2/CALM1/CALM3/PLCG1/ITPR1/RASA1/VEGFA	8
R-HSA-186763	Downstream signal transduction	10/1829	29/10654	0.0186092	0.210129	0.190663	BCAR1/STAT5B/STAT5A/NCK2/STAT1/PLCG1/PDGFB/PDGFRA/RASA1/PDGFA	10
R-HSA-5218920	VEGFR2 mediated vascular permeability	10/1829	29/10654	0.0186092	0.210129	0.190663	MTOR/VAV3/CALM2/CALM1/AKT1/JUP/VAV1/CALM3/PRR5/MAPKAP1	10
R-HSA-446652	Interleukin-1 family signaling	34/1829	140/10654	0.019492	0.217203	0.197082	PSMA5/PTPN7/PTPN14/ALOX5/NFKB2/PSMD13/PSMA1/PTPN6/IRAK3/UBE2N/HMGB1/NFKBIA/SMAD3/NOD2/PSMD7/PSMB3/PSMD3/PSME3/PSMC5/MAP2K6/PTPN2/PSMC4/IL1B/IL1RN/PSMD1/PTPN23/PSMD2/IL1RAP/TAB2/PSMB1/PTPN12/CUL1/RIPK2/IRAK1	34
R-HSA-112040	G-protein mediated events	16/1829	55/10654	0.0195563	0.217203	0.197082	CAMK2G/ITPR2/PDE1B/ADCY4/CALM2/CALM1/PLCB2/PRKACA/CALM3/ADCY3/ITPR1/PRKAR2A/CAMK2D/CAMK4/ADCY1/GNAI1	16
R-HSA-2426168	Activation of gene expression by SREBF (SREBP)	13/1829	42/10654	0.0202442	0.21846	0.198222	FDPS/IDI1/SCD/MVD/SREBF1/HELZ2/LSS/HMGCS1/HMGCR/FDFT1/SQLE/RXRA/TBL1X	13
R-HSA-3928662	EPHB-mediated forward signaling	13/1829	42/10654	0.0202442	0.21846	0.198222	YES1/ROCK2/ITSN1/EPHB1/RASA1/FYN/LIMK1/EPHB4/EPHB6/LYN/SDC2/PTK2/EFNB1	13
R-HSA-909733	Interferon alpha/beta signaling	19/1829	69/10654	0.0208661	0.21846	0.198222	ISG15/IFIT3/IFITM1/IFITM3/IRF7/PTPN6/STAT2/OAS3/OAS2/IRF9/IFI27/SOCS1/SOCS3/TYK2/STAT1/MX1/IRF2/IRF1/IRF5	19
R-HSA-1168372	Downstream signaling events of B Cell Receptor (BCR)	22/1829	83/10654	0.0210858	0.21846	0.198222	PSMA5/PSMD13/PSMA1/NFKBIA/CALM2/CALM1/NFATC3/PSMD7/PSMB3/PSMD3/PSME3/PSMC5/NFATC1/PSMC4/CALM3/PSMD1/FKBP1A/PSMD2/PPP3CA/PSMB1/CARD11/CUL1	22
R-HSA-187577	SCF(Skp2)-mediated degradation of p27/p21	17/1829	60/10654	0.0212685	0.21846	0.198222	PSMA5/PSMD13/PSMA1/CCND1/CCNA1/PSMD7/PSMB3/PSMD3/PSME3/PSMC5/PSMC4/PSMD1/PTK6/PSMD2/PSMB1/CUL1/CCNE2	17
R-HSA-111996	Ca-dependent events	12/1829	38/10654	0.0215188	0.21846	0.198222	CAMK2G/PDE1B/ADCY4/CALM2/CALM1/PRKACA/CALM3/ADCY3/PRKAR2A/CAMK2D/CAMK4/ADCY1	12
R-HSA-8950505	Gene and protein expression by JAK-STAT signaling after Interleukin-12 stimulation	12/1829	38/10654	0.0215188	0.21846	0.198222	ARF1/HNRNPF/PDCD4/LCP1/PITPNA/CNN2/STAT4/LMNB1/HSPA9/SOD2/RALA/MSN	12
R-HSA-3656237	Defective EXT2 causes exostoses 2	6/1829	14/10654	0.0218385	0.21846	0.198222	HSPG2/SDC3/GPC1/SDC4/SDC2/EXT1	6
R-HSA-3656253	Defective EXT1 causes exostoses 1, TRPS2 and CHDS	6/1829	14/10654	0.0218385	0.21846	0.198222	HSPG2/SDC3/GPC1/SDC4/SDC2/EXT1	6
R-HSA-418359	Reduction of cytosolic Ca++ levels	6/1829	14/10654	0.0218385	0.21846	0.198222	ATP2B4/ATP2B1/CALM2/CALM1/CALM3/SLC8A1	6
R-HSA-442720	CREB1 phosphorylation through the activation of Adenylate Cyclase	6/1829	14/10654	0.0218385	0.21846	0.198222	CALM2/CALM1/PRKACA/CALM3/PRKAR2A/ADCY1	6
R-HSA-877312	Regulation of IFNG signaling	6/1829	14/10654	0.0218385	0.21846	0.198222	PTPN6/SOCS1/SOCS3/PTPN2/STAT1/IFNGR2	6
R-HSA-918233	TRAF3-dependent IRF activation pathway	6/1829	14/10654	0.0218385	0.21846	0.198222	IKBKE/IRF7/TRAF3/RNF135/TRIM25/IFIH1	6
R-HSA-450531	Regulation of mRNA stability by proteins that bind AU-rich elements	23/1829	88/10654	0.0219266	0.21846	0.198222	PSMA5/MAPKAPK2/PSMD13/PSMA1/ZFP36L1/AKT1/PSMD7/PSMB3/PSMD3/PSME3/PSMC5/ZFP36/PSMC4/EXOSC5/XPO1/PSMD1/MAPK11/EXOSC7/PSMD2/PSMB1/HSPB1/PABPC1/EXOSC4	23
R-HSA-936440	Negative regulators of DDX58/IFIH1 signaling	11/1829	34/10654	0.0227107	0.224265	0.203489	ISG15/IKBKE/TRAF3/NLRC5/RNF135/TRIM25/RNF125/IFIH1/ITCH/ATG5/TNFAIP3	11
R-HSA-9020591	Interleukin-12 signaling	14/1829	47/10654	0.0228403	0.224265	0.203489	ARF1/HNRNPF/PDCD4/LCP1/PITPNA/P4HB/CNN2/TYK2/STAT4/LMNB1/HSPA9/SOD2/RALA/MSN	14
R-HSA-442742	CREB1 phosphorylation through NMDA receptor-mediated activation of RAS signaling	10/1829	30/10654	0.0237306	0.230056	0.208744	RPS6KA1/CAMK2G/CALM2/CALM1/RASGRF1/MAPK3/CALM3/GRIN2D/CAMK2D/RPS6KA3	10
R-HSA-9020702	Interleukin-1 signaling	26/1829	103/10654	0.0239058	0.230056	0.208744	PSMA5/NFKB2/PSMD13/PSMA1/IRAK3/UBE2N/HMGB1/NFKBIA/NOD2/PSMD7/PSMB3/PSMD3/PSME3/PSMC5/MAP2K6/PSMC4/IL1B/IL1RN/PSMD1/PSMD2/IL1RAP/TAB2/PSMB1/CUL1/RIPK2/IRAK1	26
R-HSA-1839117	Signaling by cytosolic FGFR1 fusion mutants	7/1829	18/10654	0.0239394	0.230056	0.208744	STAT5B/STAT5A/STAT1/LRRFIP1/FGFR1OP/CUX1/CNTRL	7
R-HSA-975576	N-glycan antennae elongation in the medial/trans-Golgi	9/1829	26/10654	0.0244403	0.23297	0.211388	FUCA1/B4GALT3/ST3GAL4/MGAT2/MAN2A2/MGAT4A/MGAT5/B4GALT5/MGAT4B	9
R-HSA-1433557	Signaling by SCF-KIT	13/1829	43/10654	0.0245865	0.23297	0.211388	CBL/PTPN6/FES/SOCS1/STAT5B/STAT5A/YES1/VAV1/STAT1/MMP9/KIT/FYN/LYN	13
R-HSA-1059683	Interleukin-6 signaling	5/1829	11/10654	0.0275523	0.252252	0.228884	CBL/SOCS3/TYK2/STAT1/IL6ST	5
R-HSA-189451	Heme biosynthesis	5/1829	11/10654	0.0275523	0.252252	0.228884	PPOX/UROS/HMBS/COX10/ALAD	5
R-HSA-196780	Biotin transport and metabolism	5/1829	11/10654	0.0275523	0.252252	0.228884	PC/SLC5A6/BTD/PCCB/MCCC2	5
R-HSA-2586552	Signaling by Leptin	5/1829	11/10654	0.0275523	0.252252	0.228884	SH2B1/STAT5B/STAT5A/SOCS3/IRS1	5
R-HSA-9020956	Interleukin-27 signaling	5/1829	11/10654	0.0275523	0.252252	0.228884	EBI3/TYK2/IL27RA/STAT1/IL6ST	5
R-HSA-70268	Pyruvate metabolism	10/1829	31/10654	0.0297942	0.270948	0.245847	DLAT/LDHB/PDP2/SLC16A3/VDAC1/GLO1/MPC1/DLD/PDP1/RXRA	10
R-HSA-975577	N-Glycan antennae elongation	6/1829	15/10654	0.0312234	0.282052	0.255923	B4GALT3/ST3GAL4/MGAT4A/MGAT5/B4GALT5/MGAT4B	6
R-HSA-73980	RNA Polymerase III Transcription Termination	8/1829	23/10654	0.0322267	0.287284	0.26067	NFIA/POLR3B/POLR3K/POLR3E/POLR2E/NFIX/POLR3H/POLR1C	8
R-HSA-9617324	Negative regulation of NMDA receptor-mediated neuronal transmission	8/1829	23/10654	0.0322267	0.287284	0.26067	CAMK2G/CALM2/CALM1/CALM3/GRIN2D/CAMK1/CAMK2D/CAMK4	8
R-HSA-166520	Signaling by NTRKs	25/1829	101/10654	0.0330361	0.291546	0.264538	RPS6KA1/DNM3/MAPKAPK2/RPS6KA5/MAP2K5/FURIN/PCSK6/MAPK3/CDK5R1/DUSP3/PTPRS/VRK3/PPP2R1A/IRS1/PLCG1/MAPK11/DUSP7/GAB1/MAPK13/FYN/RALA/DUSP4/RALGDS/RPS6KA3/ELK1	25
R-HSA-9009391	Extra-nuclear estrogen signaling	20/1829	77/10654	0.0331352	0.291546	0.264538	GNG5/GNG4/CCND1/FOS/CALM2/CALM1/AKT1/GNB5/MAPK3/BCL2/GNG7/CALM3/PRMT1/XPO1/MMP9/HBEGF/HSPB1/GNAI1/PTK2/ELK1	20
R-HSA-5357801	Programmed Cell Death	41/1829	181/10654	0.0337127	0.293354	0.266178	PSMA5/LMNA/VIM/PSMD13/PSMA1/APAF1/HMGB1/RIPK3/AKT1/UACA/MAPK3/PSMD7/C1QBP/PSMB3/PSMD3/PSME3/NMT1/PSMC5/BCL2/PSMC4/BBC3/BCL2L11/CFLAR/PSMD1/BID/TNFSF10/PSMD2/HMGB2/OCLN/LMNB1/CD14/BAK1/PSMB1/CYCS/DBNL/TNFRSF10B/LY96/PTK2/PLEC/TJP2/GSN	41
R-HSA-195253	Degradation of beta-catenin by the destruction complex	21/1829	82/10654	0.0341528	0.293354	0.266178	PSMA5/FRAT1/FRAT2/CTBP2/PSMD13/PSMA1/TLE3/PSMD7/PSMB3/PSMD3/PSME3/PSMC5/PSMC4/PPP2R1A/PSMD1/PSMD2/TCF7/PSMB1/CUL1/TLE4/TLE1	21
R-HSA-9013694	Signaling by NOTCH4	21/1829	82/10654	0.0341528	0.293354	0.266178	PSMA5/APH1A/PSEN2/PSMD13/PSMA1/AKT1/ADAM10/SMAD3/PSMD7/PSMB3/PSMD3/PSME3/PSMC5/PSMC4/PSMD1/JAG1/PSMD2/RBPJ/MAML1/PSMB1/CUL1	21
R-HSA-168638	NOD1/2 Signaling Pathway	11/1829	36/10654	0.0344158	0.293354	0.266178	UBE2N/NOD2/MAP2K6/ITCH/MAPK11/MAPK13/TNFAIP3/TAB2/RIPK2/CARD9/IRAK1	11
R-HSA-8878166	Transcriptional regulation by RUNX2	29/1829	121/10654	0.0344231	0.293354	0.266178	PSMA5/PSMD13/PSMA1/ESRRA/CCND1/ITGA5/LGALS3/AKT1/MAPK3/PSMD7/PSMB3/PSMD3/PSME3/COL1A1/PSMC5/YES1/PSMC4/STAT1/PSMD1/TWIST2/BMP2/PSMD2/NKX3-2/NR3C1/PPARGC1B/PSMB1/CUL1/ABL1/HDAC6	29
R-HSA-1980143	Signaling by NOTCH1	19/1829	73/10654	0.0364757	0.306541	0.278143	HEYL/APH1A/PSEN2/DTX4/NCOR2/ADAM10/TLE3/ARRB2/JAG1/ITCH/RBPJ/NEURL1B/MAML1/DLL1/CUL1/TLE4/TLE1/TBL1X/HDAC6	19
R-HSA-8939902	Regulation of RUNX2 expression and activity	19/1829	73/10654	0.0364757	0.306541	0.278143	PSMA5/PSMD13/PSMA1/ESRRA/PSMD7/PSMB3/PSMD3/PSME3/PSMC5/PSMC4/STAT1/PSMD1/BMP2/PSMD2/NKX3-2/NR3C1/PPARGC1B/PSMB1/CUL1	19
R-HSA-2173789	TGF-beta receptor signaling activates SMADs	10/1829	32/10654	0.0368754	0.306541	0.278143	BAMBI/CBL/SMAD3/FURIN/MTMR4/SMAD7/UBE2M/XPO1/FKBP1A/TGFBR1	10
R-HSA-5673000	RAF activation	10/1829	32/10654	0.0368754	0.306541	0.278143	CAMK2G/MAP3K11/CALM2/CALM1/MARK3/PHB/CALM3/PPP2R1A/CAMK2D/ARAF	10
R-HSA-1483249	Inositol phosphate metabolism	14/1829	50/10654	0.0381008	0.312889	0.283903	INPP5A/CALM2/CALM1/ITPK1/PLCB2/ITPKA/PLCG2/PLCD3/IMPA2/CALM3/INPP4A/INPP1/PLCG1/INPP4B	14
R-HSA-1793185	Chondroitin sulfate/dermatan sulfate metabolism	14/1829	50/10654	0.0381008	0.312889	0.283903	HSPG2/SDC3/CSGALNACT2/CHST3/CHST11/CSPG4/XYLT1/GPC1/SDC4/HYAL3/IDUA/CHST12/CHPF2/SDC2	14
R-HSA-1855204	Synthesis of IP3 and IP4 in the cytosol	9/1829	28/10654	0.0392287	0.31956	0.289956	CALM2/CALM1/ITPK1/PLCB2/ITPKA/PLCG2/PLCD3/CALM3/PLCG1	9
R-HSA-418346	Platelet homeostasis	22/1829	88/10654	0.0393849	0.31956	0.289956	FGR/LRP8/GNG5/ATP2B4/GNG4/MRVI1/PTPN6/ITPR2/PDE1B/ATP2B1/P2RX4/CALM2/CALM1/GNB5/P2RX1/GNG7/CALM3/PTGIR/PPP2R1A/SLC8A1/ITPR1/ORAI2	22
R-HSA-109581	Apoptosis	40/1829	178/10654	0.0398818	0.321666	0.291867	PSMA5/LMNA/VIM/PSMD13/PSMA1/APAF1/HMGB1/AKT1/UACA/MAPK3/PSMD7/C1QBP/PSMB3/PSMD3/PSME3/NMT1/PSMC5/BCL2/PSMC4/BBC3/BCL2L11/CFLAR/PSMD1/BID/TNFSF10/PSMD2/HMGB2/OCLN/LMNB1/CD14/BAK1/PSMB1/CYCS/DBNL/TNFRSF10B/LY96/PTK2/PLEC/TJP2/GSN	40
R-HSA-1474151	Tetrahydrobiopterin (BH4) synthesis, recycling, salvage and regulation	5/1829	12/10654	0.0406959	0.322473	0.292599	CALM2/CALM1/AKT1/CALM3/SPR	5
R-HSA-210990	PECAM1 interactions	5/1829	12/10654	0.0406959	0.322473	0.292599	PTPN6/YES1/PLCG1/FYN/LYN	5
R-HSA-4641265	Repression of WNT target genes	5/1829	12/10654	0.0406959	0.322473	0.292599	CTBP2/TLE3/TCF7/TLE4/TLE1	5
R-HSA-5610787	Hedgehog 'off' state	27/1829	113/10654	0.0415969	0.326484	0.296239	PSMA5/GPR161/PSMD13/PSMA1/DYNC2H1/TULP3/IFT88/ADCY4/PSMD7/TUBB3/PSMB3/PSMD3/PSME3/PSMC5/TUBB4A/PRKACA/PSMC4/ADCY3/PSMD1/ITCH/PRKAR2A/PSMD2/WDR19/PSMB1/ADCY1/CUL1/PTCH1	27
R-HSA-196854	Metabolism of vitamins and cofactors	42/1829	189/10654	0.0422892	0.326484	0.296239	NADK/PANK4/UBIAD1/HSPG2/SDC3/MMACHC/LRP8/FLAD1/NMNAT2/AKR1C1/AKR1C3/PDSS1/PC/LRP1/SHMT2/COQ6/CALM2/CALM1/AKT1/ABCC1/COQ9/CALM3/SLC5A6/SPR/IDH1/GPC1/SDC4/BTD/PARP9/PARP14/PCCB/NMNAT3/CD38/MCCC2/PANK3/COQ3/NAMPT/SDC2/LRP12/PARP10/SLC52A2/NMRK1	42
R-HSA-1181150	Signaling by NODAL	7/1829	20/10654	0.0427046	0.326484	0.296239	DRAP1/ACVR1B/SMAD3/FURIN/PCSK6/GDF1/ACVR1C	7
R-HSA-5627117	RHO GTPases Activate ROCKs	7/1829	20/10654	0.0427046	0.326484	0.296239	MYL6/PPP1R12A/MYH10/MYL12A/MYH14/ROCK2/LIMK1	7
R-HSA-189445	Metabolism of porphyrins	6/1829	16/10654	0.0428887	0.326484	0.296239	PPOX/UROS/HMBS/HMOX2/COX10/ALAD	6
R-HSA-429958	mRNA decay by 3' to 5' exoribonuclease	6/1829	16/10654	0.0428887	0.326484	0.296239	DCPS/WDR61/NT5C3B/EXOSC5/EXOSC7/EXOSC4	6
R-HSA-9614657	FOXO-mediated transcription of cell death genes	6/1829	16/10654	0.0428887	0.326484	0.296239	PINK1/BBC3/BCL2L11/BCL6/CITED2/FOXO4	6
R-HSA-381119	Unfolded Protein Response (UPR)	23/1829	94/10654	0.0447183	0.33851	0.30715	EXTL2/CREB3L4/LMNA/ATF3/CREB3L1/SYVN1/CTDSP2/HSP90B1/HERPUD1/ATP6V0D1/CCL2/CALR/EXOSC5/PREB/CEBPB/EDEM1/EXOSC7/SRPRB/CREBRF/CUL7/EXTL3/EXOSC4/TSPYL2	23
R-HSA-5358351	Signaling by Hedgehog	34/1829	149/10654	0.0452035	0.340282	0.308758	PSMA5/GPR161/PSMD13/SCUBE2/PSMA1/SYVN1/DYNC2H1/TULP3/OS9/IFT88/ADCY4/PSMD7/TUBB3/ARRB2/PSMB3/PSMD3/PSME3/PSMC5/P4HB/TUBB4A/PRKACA/PSMC4/ADCY3/PSMD1/ITCH/PRKAR2A/PSMD2/EVC/WDR19/PSMB1/IQCE/ADCY1/CUL1/PTCH1	34
R-HSA-380259	Loss of Nlp from mitotic centrosomes	18/1829	70/10654	0.0457159	0.340358	0.308827	SDCCAG8/ACTR1A/CENPJ/CCP110/TUBB4A/PRKACA/HAUS8/PPP2R1A/ALMS1/CLASP1/DYNC1I2/PCNT/CEP70/CEP135/PLK4/FGFR1OP/CNTRL/HAUS7	18
R-HSA-380284	Loss of proteins required for interphase microtubule organization from the centrosome	18/1829	70/10654	0.0457159	0.340358	0.308827	SDCCAG8/ACTR1A/CENPJ/CCP110/TUBB4A/PRKACA/HAUS8/PPP2R1A/ALMS1/CLASP1/DYNC1I2/PCNT/CEP70/CEP135/PLK4/FGFR1OP/CNTRL/HAUS7	18
R-HSA-9612973	Autophagy	28/1829	119/10654	0.0459828	0.340474	0.308933	MTOR/MFN2/PINK1/RRAGC/VIM/AMBRA1/UVRAG/PRKAB1/VPS37B/IFT88/RNASE1/ATG4D/MVB12A/TOMM40/ATG9A/CHMP4B/MAP1LC3A/PCNT/TOMM22/VDAC1/HSP90AB1/RRAGD/ATG5/VPS37D/RB1CC1/MVB12B/HDAC6/LAMP2	28
R-HSA-8982491	Glycogen metabolism	9/1829	29/10654	0.0485075	0.357216	0.324123	PGM1/AGL/PGM2L1/CALM2/CALM1/PHKG2/CALM3/GBE1/GYG1	9
R-HSA-5678895	Defective CFTR causes cystic fibrosis	16/1829	61/10654	0.0488306	0.357652	0.324519	PSMA5/ERLIN1/PSMD13/PSMA1/OS9/PSMD7/PSMB3/PSMD3/PSME3/PSMC5/PSMC4/PSMD1/DERL3/PSMD2/PSMB1/ERLIN2	16
R-HSA-1474244	Extracellular matrix organization	63/1829	301/10654	0.0491921	0.358362	0.325163	HSPG2/SDC3/COL8A2/COL24A1/ADAMTS4/LAMC1/LAMB3/CAPN2/NID1/ADAMTS14/CD151/CTSD/CD44/LRP4/EFEMP2/NCAM1/ITGA5/ITGA7/MMP19/LTBP2/ADAM10/FURIN/MMP25/ITGAL/ITGAM/ITGAX/MFAP4/COL1A1/TIMP2/P4HB/EMILIN2/PTPRS/ICAM1/CAPN12/EMILIN1/ITGA6/ITGA4/BMP2/SDC4/MMP9/ITGB2/COL18A1/COL6A1/PDGFB/SCUBE1/FBLN1/CRTAP/ITGA9/COL7A1/CD47/ITGB5/PLOD2/ADAMTS3/ADAM19/ADAMTS2/COL12A1/PDGFA/SERPINE1/CTSB/LOXL2/SDC2/PLEC/COL15A1	63
R-HSA-5655302	Signaling by FGFR1 in disease	11/1829	38/10654	0.0498237	0.361022	0.327577	STAT5B/STAT5A/STAT1/LRRFIP1/PLCG1/GAB1/FGFR1OP/CUX1/ERLIN2/FGFR1/CNTRL	11
R-HSA-72766	Translation	61/1829	291/10654	0.0508944	0.366819	0.332837	AURKAIP1/EIF3I/MRPS21/DAP3/MRPL24/SEC61A2/PPA1/MRPS16/CHCHD1/EIF3M/TRMT112/MRPL11/MRPL21/SPCS2/CARS2/OXA1L/SEC11A/MRPS34/TUFM/MRPL27/MRPS7/MRPL38/MRPL12/EEF2/MRPL4/GADD45GIP1/MRPL34/EIF3K/MRPS12/MRPL33/MTIF2/MRPL35/MRPS5/MRPS9/MARS2/MRPL44/MRPS26/EEF1A2/MRPS6/MRPS25/SRPRB/MRPS22/GFM1/MRPL47/EIF2B5/MRPL36/MRPS30/ETF1/RPL10A/MRPS10/MRPL2/MRPS18A/MTRF1L/AIMP2/MRPS33/EIF4EBP1/MRPL15/PABPC1/MRRF/MRPS2…	61
R-HSA-2029485	Role of phospholipids in phagocytosis	8/1829	25/10654	0.0518793	0.371939	0.337483	FCGR2A/ITPR2/PLCG2/PRKCE/PLCG1/ITPR1/PLD1/SYK	8
R-HSA-438064	Post NMDA receptor activation events	20/1829	81/10654	0.0537096	0.383034	0.34755	RPS6KA1/CAMK2G/NRGN/PRKAB1/CALM2/CALM1/RASGRF1/MAPK3/TUBB3/GIT1/TUBB4A/PRKACA/CALM3/GRIN2D/CAMK1/PRKAR2A/CAMK2D/CAMK4/ADCY1/RPS6KA3	20
R-HSA-111885	Opioid Signalling	22/1829	91/10654	0.0548679	0.387251	0.351376	GNG5/GNG4/CAMK2G/ITPR2/PDE1B/ADCY4/CALM2/CALM1/PLCB2/GNB5/GNG7/PRKACA/CALM3/PPP2R1A/ADCY3/ITPR1/PRKAR2A/PPP3CA/CAMK2D/CAMK4/ADCY1/GNAI1	22
R-HSA-9008059	Interleukin-37 signaling	7/1829	21/10654	0.0548724	0.387251	0.351376	PTPN7/PTPN14/PTPN6/SMAD3/PTPN2/PTPN23/PTPN12	7
R-HSA-8986944	Transcriptional Regulation by MECP2	16/1829	62/10654	0.0557264	0.388334	0.352359	CAMK2G/NCOR2/CALM2/CALM1/GPS2/PRKACA/CALM3/PPARG/HTT/CAMK2D/CAMK4/GPRIN1/SGK1/DLL1/TBL1X/IRAK1	16
R-HSA-418597	G alpha (z) signalling events	13/1829	48/10654	0.0569346	0.388334	0.352359	GNG5/RGS16/GNG4/ADRA2A/ADCY4/PRKCH/GNB5/GNG7/ADCY3/PRKCE/ADCY1/GNAI1/RGS20	13
R-HSA-512988	Interleukin-3, Interleukin-5 and GM-CSF signaling	13/1829	48/10654	0.0569346	0.388334	0.352359	CBL/PTPN6/STAT5B/STAT5A/YES1/VAV1/PRKACA/HCK/CSF2RB/FYN/LYN/SYK/IL2RG	13
R-HSA-202131	Metabolism of nitric oxide: eNOS activation and regulation	6/1829	17/10654	0.0569487	0.388334	0.352359	CALM2/CALM1/AKT1/CALM3/SPR/DDAH2	6
R-HSA-450385	Butyrate Response Factor 1 (BRF1) binds and destabilizes mRNA	6/1829	17/10654	0.0569487	0.388334	0.352359	MAPKAPK2/ZFP36L1/AKT1/EXOSC5/EXOSC7/EXOSC4	6
R-HSA-1502540	Signaling by Activin	5/1829	13/10654	0.0570321	0.388334	0.352359	DRAP1/ACVR1B/SMAD3/FSTL3/ACVR1C	5
R-HSA-171007	p38MAPK events	5/1829	13/10654	0.0570321	0.388334	0.352359	MAPKAPK2/MAPK11/MAPK13/RALA/RALGDS	5
R-HSA-3928663	EPHA-mediated growth cone collapse	9/1829	30/10654	0.0591262	0.397886	0.361026	MYL6/MYH10/YES1/MYL12A/EFNA2/MYH14/ROCK2/FYN/LYN	9
R-HSA-525793	Myogenesis	9/1829	30/10654	0.0591262	0.397886	0.361026	MEF2D/BNIP2/NEO1/CDH15/MAP2K6/TCF3/CTNNA2/MAPK11/ABL1	9
R-HSA-5619084	ABC transporter disorders	19/1829	77/10654	0.0593158	0.397886	0.361026	PSMA5/ERLIN1/PSMD13/PSMA1/OS9/PSMD7/PSMB3/PSMD3/PSME3/PSMC5/PSMC4/ABCB6/PSMD1/DERL3/PSMD2/PSMB1/ABCB4/ERLIN2/ABCA1	19
R-HSA-2871837	FCERI mediated NF-kB activation	20/1829	82/10654	0.0600182	0.400614	0.363502	PSMA5/FCER1G/PSMD13/PSMA1/UBE2N/NFKBIA/PSMD7/PSMB3/PSMD3/PSME3/PSMC5/RASGRP4/PSMC4/PSMD1/PSMD2/TAB2/PSMB1/CARD11/CUL1/LYN	20
R-HSA-186797	Signaling by PDGF	15/1829	58/10654	0.0616071	0.409204	0.371296	FURIN/BCAR1/STAT5B/STAT5A/NCK2/STAT1/PLCG1/COL6A1/PDGFB/PDGFRA/PDGFC/RASA1/PDGFA/PTPN12/PLAT	15
R-HSA-69231	Cyclin D associated events in G1	12/1829	44/10654	0.0628019	0.41309	0.374822	CDKN2C/CDKN1C/CCND1/MNAT1/E2F4/PPP2R1A/PTK6/CCND3/CDK6/CUL1/LYN/ABL1	12
R-HSA-69236	G1 Phase	12/1829	44/10654	0.0628019	0.41309	0.374822	CDKN2C/CDKN1C/CCND1/MNAT1/E2F4/PPP2R1A/PTK6/CCND3/CDK6/CUL1/LYN/ABL1	12
R-HSA-446219	Synthesis of substrates in N-glycan biosythesis	16/1829	63/10654	0.0632659	0.414132	0.375767	UAP1/NPL/SLC35C1/NEU3/ST3GAL4/NUDT14/PMM2/ST3GAL2/MVD/ST3GAL5/PMM1/ST3GAL6/SRD5A3/ST3GAL1/NANS/ST6GALNAC4	16
R-HSA-9615710	Microautophagy	10/1829	35/10654	0.0648304	0.417318	0.378658	VIM/VPS37B/IFT88/RNASE1/MVB12A/CHMP4B/PCNT/VPS37D/MVB12B/HDAC6	10
R-HSA-8854518	AURKA Activation by TPX2	18/1829	73/10654	0.0655642	0.417318	0.378658	SDCCAG8/ACTR1A/CENPJ/CCP110/TUBB4A/PRKACA/HAUS8/PPP2R1A/ALMS1/CLASP1/DYNC1I2/PCNT/CEP70/CEP135/PLK4/FGFR1OP/CNTRL/HAUS7	18
R-HSA-6791312	TP53 Regulates Transcription of Cell Cycle Genes	13/1829	49/10654	0.0658025	0.417318	0.378658	PLK3/GADD45A/BTG2/E2F8/TNKS1BP1/E2F7/CENPJ/CCNA1/E2F4/PRMT1/CNOT11/CDC25C/CCNE2	13
R-HSA-446193	Biosynthesis of the N-glycan precursor (dolichol lipid-linked oligosaccharide, LLO) and transfer to a nascent protein	19/1829	78/10654	0.0663041	0.417318	0.378658	UAP1/NPL/SLC35C1/NEU3/DPAGT1/ST3GAL4/NUDT14/PMM2/ST3GAL2/MVD/ST3GAL5/PMM1/RFT1/ST3GAL6/ALG3/SRD5A3/ST3GAL1/NANS/ST6GALNAC4	19
R-HSA-69202	Cyclin E associated events during G1/S transition	20/1829	83/10654	0.0668244	0.417318	0.378658	PSMA5/PSMD13/PSMA1/CCND1/CCNA1/MNAT1/AKT1/E2F4/PSMD7/PSMB3/PSMD3/PSME3/PSMC5/PSMC4/PSMD1/PTK6/PSMD2/PSMB1/CUL1/CCNE2	20
R-HSA-2565942	Regulation of PLK1 Activity at G2/M Transition	21/1829	88/10654	0.0671568	0.417318	0.378658	SDCCAG8/OPTN/ACTR1A/PPP1R12A/CENPJ/CCP110/TUBB4A/PRKACA/HAUS8/PPP2R1A/ALMS1/CLASP1/DYNC1I2/PCNT/CEP70/CEP135/PLK4/FGFR1OP/CUL1/CNTRL/HAUS7	21
R-HSA-382556	ABC-family proteins mediated transport	24/1829	103/10654	0.0672733	0.417318	0.378658	PSMA5/ABCB10/ERLIN1/PSMD13/PSMA1/OS9/ABCC4/ABCC1/PSMD7/PSMB3/PSMD3/PSME3/PSMC5/ABCA5/ABCA7/PSMC4/ABCB6/PSMD1/DERL3/PSMD2/PSMB1/ABCB4/ERLIN2/ABCB7	24
R-HSA-6811558	PI5P, PP2A and IER3 Regulate PI3K/AKT Signaling	24/1829	103/10654	0.0672733	0.417318	0.378658	PIP5K1A/PIK3AP1/AKT1/MAPK3/PIP5K1C/VAV1/INSR/PPP2R1A/IRS1/RAC2/PDGFB/IL1RAP/FGFR3/PDGFRA/KIT/GAB1/NRG2/HBEGF/FGFR4/FYN/PDGFA/FGFR1/PIP5K1B/IRAK1	24
R-HSA-442755	Activation of NMDA receptors and postsynaptic events	22/1829	93/10654	0.0673279	0.417318	0.378658	KIF17/RPS6KA1/CAMK2G/NRGN/PRKAB1/CALM2/CALM1/RASGRF1/MAPK3/TUBB3/GIT1/GRIN3B/TUBB4A/PRKACA/CALM3/GRIN2D/CAMK1/PRKAR2A/CAMK2D/CAMK4/ADCY1/RPS6KA3	22
R-HSA-9604323	Negative regulation of NOTCH4 signaling	14/1829	54/10654	0.0681778	0.417318	0.378658	PSMA5/PSMD13/PSMA1/AKT1/PSMD7/PSMB3/PSMD3/PSME3/PSMC5/PSMC4/PSMD1/PSMD2/PSMB1/CUL1	14
R-HSA-2024096	HS-GAG degradation	7/1829	22/10654	0.0689883	0.417318	0.378658	HSPG2/SDC3/NAGLU/GPC1/SDC4/IDUA/SDC2	7
R-HSA-442982	Ras activation upon Ca2+ influx through NMDA receptor	7/1829	22/10654	0.0689883	0.417318	0.378658	CAMK2G/CALM2/CALM1/RASGRF1/CALM3/GRIN2D/CAMK2D	7
R-HSA-5205685	Pink/Parkin Mediated Mitophagy	7/1829	22/10654	0.0689883	0.417318	0.378658	MFN2/PINK1/TOMM40/MAP1LC3A/TOMM22/VDAC1/ATG5	7
R-HSA-8862803	Deregulated CDK5 triggers multiple neurodegenerative pathways in Alzheimer's disease models	7/1829	22/10654	0.0689883	0.417318	0.378658	LMNA/CAPN2/CDK5R1/BCL2L11/LMNB1/CDC25C/SOD2	7
R-HSA-8863678	Neurodegenerative Diseases	7/1829	22/10654	0.0689883	0.417318	0.378658	LMNA/CAPN2/CDK5R1/BCL2L11/LMNB1/CDC25C/SOD2	7
R-HSA-912631	Regulation of signaling by CBL	7/1829	22/10654	0.0689883	0.417318	0.378658	CBL/YES1/VAV1/HCK/FYN/LYN/SYK	7
R-HSA-9613829	Chaperone Mediated Autophagy	7/1829	22/10654	0.0689883	0.417318	0.378658	VIM/IFT88/RNASE1/PCNT/HSP90AB1/HDAC6/LAMP2	7
R-HSA-5676590	NIK-->noncanonical NF-kB signaling	15/1829	59/10654	0.0700368	0.420853	0.381865	PSMA5/NFKB2/PSMD13/PSMA1/PSMD7/PSMB3/PSMD3/PSME3/PSMC5/PSMC4/UBE2M/PSMD1/PSMD2/PSMB1/CUL1	15
R-HSA-1839124	FGFR1 mutant receptor activation	9/1829	31/10654	0.0711256	0.420853	0.381865	STAT5B/STAT5A/STAT1/LRRFIP1/FGFR1OP/CUX1/ERLIN2/FGFR1/CNTRL	9
R-HSA-196807	Nicotinate metabolism	9/1829	31/10654	0.0711256	0.420853	0.381865	NADK/NMNAT2/PARP9/PARP14/NMNAT3/CD38/NAMPT/PARP10/NMRK1	9
R-HSA-2122948	Activated NOTCH1 Transmits Signal to the Nucleus	9/1829	31/10654	0.0711256	0.420853	0.381865	APH1A/PSEN2/DTX4/ADAM10/ARRB2/JAG1/ITCH/NEURL1B/DLL1	9
R-HSA-389661	Glyoxylate metabolism and glycine degradation	9/1829	31/10654	0.0711256	0.420853	0.381865	DHTKD1/DLAT/DLST/NDUFAB1/GOT2/BCKDHA/GNMT/OGDH/DLD	9
R-HSA-1630316	Glycosaminoglycan metabolism	28/1829	124/10654	0.0718704	0.423411	0.384186	HSPG2/SLC9A1/SDC3/B4GALT3/CSGALNACT2/CHST3/CD44/ST3GAL4/GNS/CHST11/CSPG4/XYLT1/ST3GAL2/NAGLU/B3GNT7/GPC1/SDC4/B4GALT5/HYAL3/ST3GAL6/IDUA/SLC26A2/NDST1/CHST12/CHPF2/SDC2/EXT1/ST3GAL1	28
R-HSA-111471	Apoptotic factor-mediated response	6/1829	18/10654	0.0734533	0.425681	0.386246	APAF1/UACA/MAPK3/C1QBP/BAK1/CYCS	6
R-HSA-5676594	TNF receptor superfamily (TNFSF) members mediating non-canonical NF-kB pathway	6/1829	18/10654	0.0734533	0.425681	0.386246	LTBR/TRAF3/TNFRSF12A/TNFRSF11A/TNFSF14/CD40	6
R-HSA-73780	RNA Polymerase III Chain Elongation	6/1829	18/10654	0.0734533	0.425681	0.386246	POLR3B/POLR3K/POLR3E/POLR2E/POLR3H/POLR1C	6
R-HSA-1236975	Antigen processing-Cross presentation	23/1829	99/10654	0.0740751	0.425681	0.386246	PSMA5/SEC61A2/PSMD13/PSMA1/PSMD7/PSMB3/PSMD3/PSME3/MRC2/PSMC5/CALR/PSMC4/VAMP8/PSMD1/NCF4/ITGB5/PSMD2/TLR2/LNPEP/CD14/PSMB1/CD36/LY96	23
R-HSA-1483255	PI Metabolism	20/1829	84/10654	0.0741407	0.425681	0.386246	PIP5K1A/PIK3C2B/ARF1/PI4K2A/GDPD5/ARF3/GDE1/GDPD3/MTMR4/PIP5K1C/INPP4A/PI4KA/INPP4B/MTMR12/TNFAIP8/FIG4/PLEKHA2/PIP5K1B/PNPLA7/MTM1	20
R-HSA-381340	Transcriptional regulation of white adipocyte differentiation	20/1829	84/10654	0.0741407	0.425681	0.386246	ADIRF/MED13L/NCOR2/KLF5/SREBF1/CEBPA/MED29/CEBPB/HELZ2/PPARG/CCND3/CDK19/CD36/ZNF467/CEBPD/KLF4/MED27/RXRA/TBL1X/MED12	20
R-HSA-1236978	Cross-presentation of soluble exogenous antigens (endosomes)	13/1829	50/10654	0.0755356	0.430587	0.390698	PSMA5/PSMD13/PSMA1/PSMD7/PSMB3/PSMD3/PSME3/MRC2/PSMC5/PSMC4/PSMD1/PSMD2/PSMB1	13
R-HSA-450341	Activation of the AP-1 family of transcription factors	4/1829	10/10654	0.0763299	0.430587	0.390698	FOS/MAPK3/ATF2/MAPK11	4
R-HSA-5602498	MyD88 deficiency (TLR2/4)	4/1829	10/10654	0.0763299	0.430587	0.390698	TLR2/CD14/CD36/LY96	4
R-HSA-1855183	Synthesis of IP2, IP, and Ins in the cytosol	5/1829	14/10654	0.0765841	0.430587	0.390698	INPP5A/IMPA2/INPP4A/INPP1/INPP4B	5
R-HSA-193775	Synthesis of bile acids and bile salts via 24-hydroxycholesterol	5/1829	14/10654	0.0765841	0.430587	0.390698	AKR1C2/AKR1C1/AKR1C3/SLC27A2/HSD3B7	5
R-HSA-174113	SCF-beta-TrCP mediated degradation of Emi1	14/1829	55/10654	0.0776242	0.434631	0.394367	PSMA5/PSMD13/PSMA1/PSMD7/PSMB3/PSMD3/PSME3/PSMC5/PSMC4/PSMD1/PSMD2/FBXO5/PSMB1/CUL1	14
R-HSA-8978868	Fatty acid metabolism	38/1829	177/10654	0.0791626	0.43717	0.396671	ELOVL1/ACOT11/SLC27A3/MAPKAPK2/AKR1C3/ALOX5/SCD/ACSL5/FADS2/CPT1A/LTA4H/ACADS/SLC27A2/ECI1/ABCC1/NDUFAB1/NUDT7/ACSF2/PCTP/ACOX1/HADHA/CYP1B1/DBI/GGT1/SLC25A17/SLC25A20/GPX1/PCCB/SCD5/ACSL1/LTC4S/TBXAS1/EPHX2/DECR1/PTGS1/PTGES2/CRAT/RXRA	38
R-HSA-5607761	Dectin-1 mediated noncanonical NF-kB signaling	15/1829	60/10654	0.0791968	0.43717	0.396671	PSMA5/NFKB2/PSMD13/PSMA1/PSMD7/PSMB3/PSMD3/PSME3/PSMC5/PSMC4/UBE2M/PSMD1/PSMD2/PSMB1/CUL1	15
R-HSA-5610780	Degradation of GLI1 by the proteasome	15/1829	60/10654	0.0791968	0.43717	0.396671	PSMA5/PSMD13/PSMA1/PSMD7/PSMB3/PSMD3/PSME3/PSMC5/PRKACA/PSMC4/PSMD1/ITCH/PSMD2/PSMB1/CUL1	15
R-HSA-5358346	Hedgehog ligand biogenesis	16/1829	65/10654	0.0803458	0.43717	0.396671	PSMA5/PSMD13/SCUBE2/PSMA1/SYVN1/OS9/PSMD7/PSMB3/PSMD3/PSME3/PSMC5/P4HB/PSMC4/PSMD1/PSMD2/PSMB1	16
R-HSA-9614085	FOXO-mediated transcription	16/1829	65/10654	0.0803458	0.43717	0.396671	PINK1/GADD45A/CAT/AKT1/SMAD3/SREBF1/BBC3/BCL2L11/BCL6/CCNG2/NR3C1/CITED2/SOD2/PLXNA4/KLF4/FOXO4	16
R-HSA-3858494	Beta-catenin independent WNT signaling	32/1829	146/10654	0.0804934	0.43717	0.396671	GNG5/PSMA5/GNG4/PSMD13/PSMA1/ITPR2/PRICKLE1/DAAM1/CALM2/CALM1/PLCB2/GNB5/PSMD7/ARRB2/DVL2/PSMB3/PSMD3/PSME3/PSMC5/RAC3/NFATC1/GNG7/PSMC4/CALM3/FZD7/PSMD1/RAC2/ITPR1/PSMD2/PPP3CA/TCF7/PSMB1	32
R-HSA-74158	RNA Polymerase III Transcription	11/1829	41/10654	0.0806587	0.43717	0.396671	NFIA/POU2F1/POLR3B/GTF3A/POLR3K/POLR3E/POLR2E/NFIX/POLR3H/POLR1C/TBP	11
R-HSA-749476	RNA Polymerase III Abortive And Retractive Initiation	11/1829	41/10654	0.0806587	0.43717	0.396671	NFIA/POU2F1/POLR3B/GTF3A/POLR3K/POLR3E/POLR2E/NFIX/POLR3H/POLR1C/TBP	11
R-HSA-1474290	Collagen formation	21/1829	90/10654	0.0818662	0.439049	0.398376	COL8A2/COL24A1/LAMB3/ADAMTS14/CD151/COL1A1/P4HB/ITGA6/MMP9/COL18A1/COL6A1/CRTAP/COL7A1/PLOD2/ADAMTS3/ADAMTS2/COL12A1/CTSB/LOXL2/PLEC/COL15A1	21
R-HSA-187037	Signaling by NTRK1 (TRKA)	19/1829	80/10654	0.081917	0.439049	0.398376	RPS6KA1/DNM3/MAPKAPK2/RPS6KA5/MAP2K5/MAPK3/DUSP3/VRK3/PPP2R1A/IRS1/PLCG1/MAPK11/DUSP7/MAPK13/RALA/DUSP4/RALGDS/RPS6KA3/ELK1	19
R-HSA-69656	Cyclin A:Cdk2-associated events at S phase entry	20/1829	85/10654	0.0819775	0.439049	0.398376	PSMA5/PSMD13/PSMA1/CCND1/CCNA1/MNAT1/AKT1/E2F4/PSMD7/PSMB3/PSMD3/PSME3/PSMC5/PSMC4/PSMD1/PTK6/PSMD2/PSMB1/CUL1/CCNE2	20
R-HSA-1251985	Nuclear signaling by ERBB4	9/1829	32/10654	0.0845279	0.448529	0.406978	STMN1/APH1A/PSEN2/PGR/WWOX/STAT5A/NRG2/HBEGF/TAB2	9
R-HSA-451326	Activation of kainate receptors upon glutamate binding	9/1829	32/10654	0.0845279	0.448529	0.406978	GNG5/GNG4/CALM2/CALM1/PLCB2/GNB5/GNG7/CALM3/NCALD	9
R-HSA-112409	RAF-independent MAPK1/3 activation	7/1829	23/10654	0.0850716	0.448529	0.406978	PEA15/DUSP10/MAPK3/TYK2/DUSP7/IL6ST/DUSP4	7
R-HSA-8949215	Mitochondrial calcium ion transport	7/1829	23/10654	0.0850716	0.448529	0.406978	VDAC2/PHB2/PHB/AFG3L2/PARL/LETM1/VDAC1	7
R-HSA-350562	Regulation of ornithine decarboxylase (ODC)	13/1829	51/10654	0.086149	0.450702	0.408949	PSMA5/PSMD13/PSMA1/NQO1/PSMD7/PSMB3/PSMD3/PSME3/PSMC5/PSMC4/PSMD1/PSMD2/PSMB1	13
R-HSA-3928665	EPH-ephrin mediated repulsion of cells	13/1829	51/10654	0.086149	0.450702	0.408949	VAV3/APH1A/PSEN2/ADAM10/YES1/EFNA2/MMP9/EPHB1/FYN/EPHB4/EPHB6/LYN/EFNB1	13
R-HSA-450408	AUF1 (hnRNP D0) binds and destabilizes mRNA	14/1829	56/10654	0.0878761	0.453982	0.411925	PSMA5/PSMD13/PSMA1/PSMD7/PSMB3/PSMD3/PSME3/PSMC5/PSMC4/PSMD1/PSMD2/PSMB1/HSPB1/PABPC1	14
R-HSA-5362768	Hh mutants that don't undergo autocatalytic processing are degraded by ERAD	14/1829	56/10654	0.0878761	0.453982	0.411925	PSMA5/PSMD13/PSMA1/SYVN1/OS9/PSMD7/PSMB3/PSMD3/PSME3/PSMC5/PSMC4/PSMD1/PSMD2/PSMB1	14
R-HSA-5578775	Ion homeostasis	14/1829	56/10654	0.0878761	0.453982	0.411925	ATP1A1/ATP2B4/CAMK2G/ITPR2/ATP2B1/CALM2/CALM1/PRKACA/DMPK/CALM3/SLC8A1/ITPR1/CAMK2D/ORAI2	14
R-HSA-15869	Metabolism of nucleotides	23/1829	101/10654	0.0888357	0.453982	0.411925	CDA/CTPS1/AMPD2/ENTPD7/TXNRD1/PNP/ADAL/NME4/DCTPP1/DHODH/PFAS/NT5C/RRM2/ATIC/ITPA/UCKL1/TYMP/GPX1/UMPS/NUDT16/GSR/RRM2B/ENTPD8	23
R-HSA-2022090	Assembly of collagen fibrils and other multimeric structures	15/1829	61/10654	0.0890988	0.453982	0.411925	COL8A2/COL24A1/LAMB3/CD151/COL1A1/ITGA6/MMP9/COL18A1/COL6A1/COL7A1/COL12A1/CTSB/LOXL2/PLEC/COL15A1	15
R-HSA-3299685	Detoxification of Reactive Oxygen Species	10/1829	37/10654	0.0894537	0.453982	0.411925	PRDX6/CAT/TXNRD1/P4HB/TXN2/NCF4/GPX1/SOD2/CYCS/GSR	10
R-HSA-77289	Mitochondrial Fatty Acid Beta-Oxidation	10/1829	37/10654	0.0894537	0.453982	0.411925	ACOT11/ACADS/ECI1/NDUFAB1/ACSF2/PCTP/HADHA/DBI/PCCB/DECR1	10
R-HSA-8878159	Transcriptional regulation by RUNX3	22/1829	96/10654	0.0894562	0.453982	0.411925	RUNX3/PSMA5/PSMD13/PSMA1/CCND1/SMAD3/ITGAL/PSMD7/PSMB3/PSMD3/PSME3/PSMC5/PSMC4/BCL2L11/ITGA4/PSMD1/JAG1/PSMD2/RBPJ/TCF7/MAML1/PSMB1	22
R-HSA-70895	Branched-chain amino acid catabolism	6/1829	19/10654	0.092389	0.467116	0.423843	ACAT1/BCAT1/BCKDHA/PPM1K/MCCC2/DLD	6
R-HSA-76061	RNA Polymerase III Transcription Initiation From Type 1 Promoter	8/1829	28/10654	0.0933728	0.468593	0.425183	POLR3B/GTF3A/POLR3K/POLR3E/POLR2E/POLR3H/POLR1C/TBP	8
R-HSA-76071	RNA Polymerase III Transcription Initiation From Type 3 Promoter	8/1829	28/10654	0.0933728	0.468593	0.425183	POU2F1/POLR3B/POLR3K/POLR3E/POLR2E/POLR3H/POLR1C/TBP	8
R-HSA-6783783	Interleukin-10 signaling	12/1829	47/10654	0.095757	0.471821	0.428112	PTAFR/IL10RA/CCL2/CCL4/FCER2/ICAM1/TYK2/IL1B/IL1RN/CCR1/CXCL1/CXCL10	12
R-HSA-6802946	Signaling by moderate kinase activity BRAF mutants	12/1829	47/10654	0.095757	0.471821	0.428112	APBB1IP/CAMK2G/MAP3K11/CALM2/CALM1/MARK3/MAPK3/ARRB2/PHB/CALM3/CAMK2D/ARAF	12
R-HSA-6802949	Signaling by RAS mutants	12/1829	47/10654	0.095757	0.471821	0.428112	APBB1IP/CAMK2G/MAP3K11/CALM2/CALM1/MARK3/MAPK3/ARRB2/PHB/CALM3/CAMK2D/ARAF	12
R-HSA-6802955	Paradoxical activation of RAF signaling by kinase inactive BRAF	12/1829	47/10654	0.095757	0.471821	0.428112	APBB1IP/CAMK2G/MAP3K11/CALM2/CALM1/MARK3/MAPK3/ARRB2/PHB/CALM3/CAMK2D/ARAF	12
R-HSA-9649948	Signaling downstream of RAS mutants	12/1829	47/10654	0.095757	0.471821	0.428112	APBB1IP/CAMK2G/MAP3K11/CALM2/CALM1/MARK3/MAPK3/ARRB2/PHB/CALM3/CAMK2D/ARAF	12
R-HSA-5668541	TNFR2 non-canonical NF-kB pathway	23/1829	102/10654	0.0968942	0.472281	0.428529	TNFRSF9/PSMA5/NFKB2/PSMD13/PSMA1/LTBR/TRAF3/TNFRSF12A/PSMD7/PSMB3/PSMD3/PSME3/PSMC5/TNFRSF11A/CD70/TNFSF14/PSMC4/UBE2M/PSMD1/CD40/PSMD2/PSMB1/CUL1	23
R-HSA-69275	G2/M Transition	41/1829	196/10654	0.0972173	0.472281	0.428529	PSMA5/CENPF/SDCCAG8/OPTN/ACTR1A/PSMD13/PSMA1/PHLDA1/PPP1R12A/CENPJ/CCNA1/MNAT1/CCP110/PSMD7/TUBB3/PSMB3/PSMD3/PSME3/PSMC5/TUBB4A/PRKACA/HAUS8/PSMC4/PPP2R1A/XPO1/ALMS1/CLASP1/DYNC1I2/PSMD1/PCNT/CEP70/PSMD2/CEP135/PLK4/CDC25C/HSP90AB1/FGFR1OP/PSMB1/CUL1/CNTRL/HAUS7	41
R-HSA-75815	Ubiquitin-dependent degradation of Cyclin D	13/1829	52/10654	0.0976509	0.472281	0.428529	PSMA5/PSMD13/PSMA1/CCND1/PSMD7/PSMB3/PSMD3/PSME3/PSMC5/PSMC4/PSMD1/PSMD2/PSMB1	13
R-HSA-1170546	Prolactin receptor signaling	5/1829	15/10654	0.0992645	0.472281	0.428529	SH2B1/STAT5B/STAT5A/GHR/CUL1	5
R-HSA-193807	Synthesis of bile acids and bile salts via 27-hydroxycholesterol	5/1829	15/10654	0.0992645	0.472281	0.428529	AKR1C2/AKR1C1/AKR1C3/HSD3B7/RXRA	5
R-HSA-391903	Eicosanoid ligand-binding receptors	5/1829	15/10654	0.0992645	0.472281	0.428529	LTB4R2/LTB4R/PTGER2/TBXA2R/PTGIR	5
R-HSA-4419969	Depolymerisation of the Nuclear Lamina	5/1829	15/10654	0.0992645	0.472281	0.428529	LMNA/CTDNEP1/LPIN1/LMNB1/LEMD2	5
R-HSA-844456	The NLRP3 inflammasome	5/1829	15/10654	0.0992645	0.472281	0.428529	NLRP3/NFKB2/PSTPIP1/PYCARD/HSP90AB1	5
R-HSA-1980145	Signaling by NOTCH2	9/1829	33/10654	0.0993358	0.472281	0.428529	APH1A/PSEN2/ADAM10/FCER2/JAG1/RBPJ/NEURL1B/MAML1/DLL1	9
R-HSA-4085001	Sialic acid metabolism	9/1829	33/10654	0.0993358	0.472281	0.428529	NPL/NEU3/ST3GAL4/ST3GAL2/ST3GAL5/ST3GAL6/ST3GAL1/NANS/ST6GALNAC4	9
R-HSA-210500	Glutamate Neurotransmitter Release Cycle	7/1829	24/10654	0.103102	0.478627	0.434287	PPFIA4/PPFIA1/SLC38A2/RAB3A/SLC17A7/SLC1A3/STX1A	7
R-HSA-5260271	Diseases of Immune System	7/1829	24/10654	0.103102	0.478627	0.434287	NFKB2/NFKBIA/TRAF3/TLR2/CD14/CD36/LY96	7
R-HSA-5602358	Diseases associated with the TLR signaling cascade	7/1829	24/10654	0.103102	0.478627	0.434287	NFKB2/NFKBIA/TRAF3/TLR2/CD14/CD36/LY96	7
R-HSA-425393	Transport of inorganic cations/anions and amino acids/oligopeptides	24/1829	108/10654	0.10417	0.478627	0.434287	SLC9A1/SLC6A12/SLC38A2/SLC7A7/CALM2/CALM1/SLC25A29/SLC7A5/SLC43A2/CALM3/SLC1A5/SLC17A7/SLC8A1/SLC1A4/SLC6A6/SLC4A7/SLC7A11/SLC9A3/SLC1A3/SLC26A2/SLC36A1/SLC7A2/SLC20A2/SLC34A3	24
R-HSA-111458	Formation of apoptosome	4/1829	11/10654	0.104203	0.478627	0.434287	APAF1/UACA/MAPK3/CYCS	4
R-HSA-446107	Type I hemidesmosome assembly	4/1829	11/10654	0.104203	0.478627	0.434287	LAMB3/CD151/ITGA6/PLEC	4
R-HSA-4755510	SUMOylation of immune response proteins	4/1829	11/10654	0.104203	0.478627	0.434287	PIAS3/IKBKE/NFKB2/NFKBIA	4
R-HSA-5603041	IRAK4 deficiency (TLR2/4)	4/1829	11/10654	0.104203	0.478627	0.434287	TLR2/CD14/CD36/LY96	4
R-HSA-9013700	NOTCH4 Activation and Transmission of Signal to the Nucleus	4/1829	11/10654	0.104203	0.478627	0.434287	APH1A/PSEN2/ADAM10/JAG1	4
R-HSA-9627069	Regulation of the apoptosome activity	4/1829	11/10654	0.104203	0.478627	0.434287	APAF1/UACA/MAPK3/CYCS	4
R-HSA-114608	Platelet degranulation	28/1829	129/10654	0.106435	0.484826	0.439912	ECM1/TAGLN2/QSOX1/SRGN/NHLRC2/CD63/ABCC4/GAS6/CALM2/CALM1/ACTN4/CALM3/PLEK/PDGFB/TEX264/TF/PCDH7/LHFPL2/PCYOX1L/BRPF3/VEGFA/CD109/PDGFA/CD36/SERPINE1/ORM1/TMSB4X/LAMP2	28
R-HSA-432040	Vasopressin regulates renal water homeostasis via Aquaporins	11/1829	43/10654	0.106626	0.484826	0.439912	GNG5/GNG4/ADCY4/GNB5/GNG7/PRKACA/ADCY3/PRKAR2A/ADCY1/AQP3/AVPR2	11
R-HSA-6782315	tRNA modification in the nucleus and cytosol	11/1829	43/10654	0.106626	0.484826	0.439912	TYW3/TRDMT1/TRMT112/PUS1/OSGEP/CTU2/TRMT1/WDR4/NSUN2/ADAT2/URM1	11
R-HSA-453274	Mitotic G2-G2/M phases	41/1829	198/10654	0.10952	0.494819	0.448979	PSMA5/CENPF/SDCCAG8/OPTN/ACTR1A/PSMD13/PSMA1/PHLDA1/PPP1R12A/CENPJ/CCNA1/MNAT1/CCP110/PSMD7/TUBB3/PSMB3/PSMD3/PSME3/PSMC5/TUBB4A/PRKACA/HAUS8/PSMC4/PPP2R1A/XPO1/ALMS1/CLASP1/DYNC1I2/PSMD1/PCNT/CEP70/PSMD2/CEP135/PLK4/CDC25C/HSP90AB1/FGFR1OP/PSMB1/CUL1/CNTRL/HAUS7	41
R-HSA-1236974	ER-Phagosome pathway	19/1829	83/10654	0.109554	0.494819	0.448979	PSMA5/SEC61A2/PSMD13/PSMA1/PSMD7/PSMB3/PSMD3/PSME3/PSMC5/CALR/PSMC4/VAMP8/PSMD1/PSMD2/TLR2/CD14/PSMB1/CD36/LY96	19
R-HSA-5658442	Regulation of RAS by GAPs	16/1829	68/10654	0.111126	0.496902	0.450869	PSMA5/PSMD13/PSMA1/PSMD7/PSMB3/PSMD3/PSME3/PSMC5/PSMC4/SPRED2/PSMD1/PSMD2/RASA1/SYNGAP1/PSMB1/DAB2IP	16
R-HSA-1226099	Signaling by FGFR in disease	15/1829	63/10654	0.111151	0.496902	0.450869	STAT5B/STAT5A/POLR2E/GTF2F1/STAT1/LRRFIP1/PLCG1/FGFR3/GAB1/FGFR4/FGFR1OP/CUX1/ERLIN2/FGFR1/CNTRL	15
R-HSA-2022870	Chondroitin sulfate biosynthesis	6/1829	20/10654	0.113682	0.496902	0.450869	CSGALNACT2/CHST3/CHST11/CSPG4/CHST12/CHPF2	6
R-HSA-3560783	Defective B4GALT7 causes EDS, progeroid type	6/1829	20/10654	0.113682	0.496902	0.450869	HSPG2/SDC3/CSPG4/GPC1/SDC4/SDC2	6
R-HSA-3560801	Defective B3GAT3 causes JDSSDHD	6/1829	20/10654	0.113682	0.496902	0.450869	HSPG2/SDC3/CSPG4/GPC1/SDC4/SDC2	6
R-HSA-388844	Receptor-type tyrosine-protein phosphatases	6/1829	20/10654	0.113682	0.496902	0.450869	PTPRF/PPFIA4/PPFIA1/SLITRK5/PTPRS/IL1RAP	6
R-HSA-4420332	Defective B3GALT6 causes EDSP2 and SEMDJL1	6/1829	20/10654	0.113682	0.496902	0.450869	HSPG2/SDC3/CSPG4/GPC1/SDC4/SDC2	6
R-HSA-5625900	RHO GTPases activate CIT	6/1829	20/10654	0.113682	0.496902	0.450869	KIF14/MYL6/PPP1R12A/MYH10/MYL12A/MYH14	6
R-HSA-622312	Inflammasomes	6/1829	20/10654	0.113682	0.496902	0.450869	NLRP3/NFKB2/PSTPIP1/PYCARD/BCL2/HSP90AB1	6
R-HSA-6803204	TP53 Regulates Transcription of Genes Involved in Cytochrome C Release	6/1829	20/10654	0.113682	0.496902	0.450869	AIFM2/BBC3/STEAP3/BID/BNIP3L/TP53INP1	6
R-HSA-425397	Transport of vitamins, nucleosides, and related molecules	11/1829	44/10654	0.121234	0.523919	0.475383	SLC35A3/SLC35C1/SLCO3A1/ARL2BP/SLC27A1/SLC5A6/SLC25A4/SLCO4C1/SLC29A1/SLC16A2/SLC25A5	11
R-HSA-199418	Negative regulation of the PI3K/AKT network	24/1829	110/10654	0.121966	0.523919	0.475383	PIP5K1A/PIK3AP1/AKT1/MAPK3/PIP5K1C/VAV1/INSR/PPP2R1A/IRS1/RAC2/PDGFB/IL1RAP/FGFR3/PDGFRA/KIT/GAB1/NRG2/HBEGF/FGFR4/FYN/PDGFA/FGFR1/PIP5K1B/IRAK1	24
R-HSA-9006335	Signaling by Erythropoietin	7/1829	25/10654	0.123022	0.523919	0.475383	PLCG2/STAT5B/STAT5A/VAV1/PLCG1/GAB1/LYN	7
R-HSA-9620244	Long-term potentiation	7/1829	25/10654	0.123022	0.523919	0.475383	CAMK2G/NRGN/CALM2/CALM1/CALM3/GRIN2D/CAMK2D	7
R-HSA-4608870	Asymmetric localization of PCP proteins	15/1829	64/10654	0.123299	0.523919	0.475383	PSMA5/PSMD13/PSMA1/PRICKLE1/PSMD7/DVL2/PSMB3/PSMD3/PSME3/PSMC5/PSMC4/FZD7/PSMD1/PSMD2/PSMB1	15
R-HSA-8854050	FBXL7 down-regulates AURKA during mitotic entry and in early mitosis	13/1829	54/10654	0.123316	0.523919	0.475383	PSMA5/PSMD13/PSMA1/PSMD7/PSMB3/PSMD3/PSME3/PSMC5/PSMC4/PSMD1/PSMD2/PSMB1/CUL1	13
R-HSA-351202	Metabolism of polyamines	14/1829	59/10654	0.123508	0.523919	0.475383	PSMA5/PSMD13/PSMA1/NQO1/PSMD7/PSMB3/PSMD3/PSME3/PSMC5/PSMC4/PSMD1/PSMD2/PSMB1/SAT1	14
R-HSA-5387390	Hh mutants abrogate ligand secretion	14/1829	59/10654	0.123508	0.523919	0.475383	PSMA5/PSMD13/PSMA1/SYVN1/OS9/PSMD7/PSMB3/PSMD3/PSME3/PSMC5/PSMC4/PSMD1/PSMD2/PSMB1	14
R-HSA-139853	Elevation of cytosolic Ca2+ levels	5/1829	16/10654	0.12489	0.523919	0.475383	ITPR2/P2RX4/P2RX1/ITPR1/ORAI2	5
R-HSA-175474	Assembly Of The HIV Virion	5/1829	16/10654	0.12489	0.523919	0.475383	VPS37B/FURIN/MVB12A/VPS37D/MVB12B	5
R-HSA-204174	Regulation of pyruvate dehydrogenase (PDH) complex	5/1829	16/10654	0.12489	0.523919	0.475383	DLAT/PDP2/DLD/PDP1/RXRA	5
R-HSA-2730905	Role of LAT2/NTAL/LAB on calcium mobilization	5/1829	16/10654	0.12489	0.523919	0.475383	FCER1G/FYN/LAT2/LYN/SYK	5
R-HSA-391160	Signal regulatory protein family interactions	5/1829	16/10654	0.12489	0.523919	0.475383	PTPN6/SIRPB1/CD47/SKAP2/PTK2	5
R-HSA-3000157	Laminin interactions	8/1829	30/10654	0.129133	0.538385	0.488509	HSPG2/LAMC1/LAMB3/NID1/ITGA7/ITGA6/COL18A1/COL7A1	8
R-HSA-4090294	SUMOylation of intracellular receptors	8/1829	30/10654	0.129133	0.538385	0.488509	PIAS3/NR1H3/PGR/NR4A2/PPARG/NR1I2/NR3C1/RXRA	8
R-HSA-216083	Integrin cell surface interactions	19/1829	85/10654	0.130824	0.541509	0.491344	HSPG2/COL8A2/CD44/ITGA5/ITGA7/ITGAL/ITGAM/ITGAX/COL1A1/ICAM1/ITGA6/ITGA4/ITGB2/COL18A1/COL6A1/ITGA9/COL7A1/CD47/ITGB5	19
R-HSA-400253	Circadian Clock	16/1829	70/10654	0.13511	0.541509	0.491344	MEF2D/CPT1A/SREBF1/CRTC1/DBP/ATF2/PER2/HELZ2/NRIP1/NR3C1/SERPINE1/NAMPT/CUL1/NFIL3/RXRA/TBL1X	16
R-HSA-264870	Caspase-mediated cleavage of cytoskeletal proteins	4/1829	12/10654	0.135956	0.541509	0.491344	VIM/DBNL/PLEC/GSN	4
R-HSA-451306	Ionotropic activity of kainate receptors	4/1829	12/10654	0.135956	0.541509	0.491344	CALM2/CALM1/CALM3/NCALD	4
R-HSA-451308	Activation of Ca-permeable Kainate Receptor	4/1829	12/10654	0.135956	0.541509	0.491344	CALM2/CALM1/CALM3/NCALD	4
R-HSA-71064	Lysine catabolism	4/1829	12/10654	0.135956	0.541509	0.491344	DLST/PIPOX/OGDH/DLD	4
R-HSA-83936	Transport of nucleosides and free purine and pyrimidine bases across the plasma membrane	4/1829	12/10654	0.135956	0.541509	0.491344	ARL2BP/SLC25A4/SLC29A1/SLC25A5	4
R-HSA-8866907	Activation of the TFAP2 (AP-2) family of transcription factors	4/1829	12/10654	0.135956	0.541509	0.491344	CITED4/WWOX/TFAP2C/CITED2	4
R-HSA-9020558	Interleukin-2 signaling	4/1829	12/10654	0.135956	0.541509	0.491344	STAT5B/STAT5A/SYK/IL2RG	4
R-HSA-9634600	Regulation of glycolysis by fructose 2,6-bisphosphate metabolism	4/1829	12/10654	0.135956	0.541509	0.491344	PFKFB2/PRKACA/PPP2R1A/PFKFB4	4
R-HSA-1566948	Elastic fibre formation	11/1829	45/10654	0.136899	0.541509	0.491344	EFEMP2/ITGA5/LTBP2/FURIN/MFAP4/EMILIN2/EMILIN1/BMP2/FBLN1/ITGB5/LOXL2	11
R-HSA-5610783	Degradation of GLI2 by the proteasome	14/1829	60/10654	0.136994	0.541509	0.491344	PSMA5/PSMD13/PSMA1/PSMD7/PSMB3/PSMD3/PSME3/PSMC5/PRKACA/PSMC4/PSMD1/PSMD2/PSMB1/CUL1	14
R-HSA-5610785	GLI3 is processed to GLI3R by the proteasome	14/1829	60/10654	0.136994	0.541509	0.491344	PSMA5/PSMD13/PSMA1/PSMD7/PSMB3/PSMD3/PSME3/PSMC5/PRKACA/PSMC4/PSMD1/PSMD2/PSMB1/CUL1	14
R-HSA-2142691	Synthesis of Leukotrienes (LT) and Eoxins (EX)	6/1829	21/10654	0.137206	0.541509	0.491344	MAPKAPK2/ALOX5/LTA4H/ABCC1/GGT1/LTC4S	6
R-HSA-6804115	TP53 regulates transcription of additional cell cycle genes whose exact role in the p53 pathway remain uncertain	6/1829	21/10654	0.137206	0.541509	0.491344	PLK3/BTG2/TNKS1BP1/CENPJ/CNOT11/CDC25C	6
R-HSA-1655829	Regulation of cholesterol biosynthesis by SREBP (SREBF)	13/1829	55/10654	0.137459	0.541509	0.491344	FDPS/IDI1/SCD/MVD/SREBF1/HELZ2/LSS/HMGCS1/HMGCR/FDFT1/SQLE/RXRA/TBL1X	13
R-HSA-8941858	Regulation of RUNX3 expression and activity	13/1829	55/10654	0.137459	0.541509	0.491344	RUNX3/PSMA5/PSMD13/PSMA1/PSMD7/PSMB3/PSMD3/PSME3/PSMC5/PSMC4/PSMD1/PSMD2/PSMB1	13
R-HSA-1227986	Signaling by ERBB2	12/1829	50/10654	0.137475	0.541509	0.491344	AKT1/YES1/MATK/PRKCE/PLCG1/PTK6/GAB1/NRG2/HBEGF/DIAPH1/FYN/PTPN12	12
R-HSA-211733	Regulation of activated PAK-2p34 by proteasome mediated degradation	12/1829	50/10654	0.137475	0.541509	0.491344	PSMA5/PSMD13/PSMA1/PSMD7/PSMB3/PSMD3/PSME3/PSMC5/PSMC4/PSMD1/PSMD2/PSMB1	12
R-HSA-453279	Mitotic G1-G1/S phases	31/1829	149/10654	0.141403	0.555364	0.503916	RPA2/CDKN2C/PSMA5/PSMD13/CDKN1C/PSMA1/CCND1/CCNA1/MNAT1/AKT1/E2F4/PSMD7/PSMB3/PSMD3/PSME3/PSMC5/PSMC4/PPP2R1A/RRM2/PSMD1/PTK6/PSMD2/CCND3/MCM3/FBXO5/PSMB1/CDK6/CUL1/LYN/CCNE2/ABL1	31
R-HSA-194315	Signaling by Rho GTPases	87/1829	455/10654	0.143543	0.561953	0.509894	ARHGEF16/ARHGEF10L/SYDE2/VAV3/ARHGEF2/IQGAP3/ARHGEF11/NUF2/KIF14/CENPF/OBSCN/ARHGAP12/DEPDC7/CTTN/ARHGEF17/ARHGDIB/FGD4/MYL6/PPP1R12A/ARHGEF40/DAAM1/CALM2/CALM1/EVL/MYO9A/RHOT2/NOXO1/MAPK3/DYNC1LI2/TUBB3/DVL2/MYH10/ARHGAP23/FMNL1/BAIAP2/RAC3/MYL12A/TUBB4A/TRIP10/VAV1/MYO9B/ARHGAP33/PLEKHG2/ARHGEF1/CALM3/MYH14/PPP2R1A/ROCK2/CENPA/RHOQ/XPO1/CLASP1/ARHGAP15/FMNL2/DYNC1I2/WIPF1/PREX1/ITSN1/NF2/NCF4/R…	87
R-HSA-180024	DARPP-32 events	7/1829	26/10654	0.144739	0.561953	0.509894	CALM2/CALM1/PRKACA/CALM3/PPP2R1A/PRKAR2A/PPP3CA	7
R-HSA-1971475	A tetrasaccharide linker sequence is required for GAG synthesis	7/1829	26/10654	0.144739	0.561953	0.509894	HSPG2/SDC3/CSPG4/XYLT1/GPC1/SDC4/SDC2	7
R-HSA-425410	Metal ion SLC transporters	7/1829	26/10654	0.144739	0.561953	0.509894	SLC30A1/SLC11A2/SLC39A10/SLC11A1/SLC39A8/SLC39A7/SLC31A1	7
R-HSA-6802957	Oncogenic MAPK signaling	16/1829	71/10654	0.148119	0.573434	0.520311	AGTRAP/LMNA/APBB1IP/CAMK2G/MAP3K11/CALM2/CALM1/MARK3/MAPK3/ARRB2/PHB/CALM3/BCL2L11/TRAK1/CAMK2D/ARAF	16
R-HSA-8949613	Cristae formation	8/1829	31/10654	0.149309	0.576393	0.522997	DNAJC11/MTX1/TMEM11/IMMT/MTX2/SAMM50/HSPA9/APOO	8
R-HSA-76005	Response to elevated platelet cytosolic Ca2+	28/1829	134/10654	0.150165	0.578049	0.524499	ECM1/TAGLN2/QSOX1/SRGN/NHLRC2/CD63/ABCC4/GAS6/CALM2/CALM1/ACTN4/CALM3/PLEK/PDGFB/TEX264/TF/PCDH7/LHFPL2/PCYOX1L/BRPF3/VEGFA/CD109/PDGFA/CD36/SERPINE1/ORM1/TMSB4X/LAMP2	28
R-HSA-2029482	Regulation of actin dynamics for phagocytic cup formation	14/1829	61/10654	0.151261	0.578229	0.524662	VAV3/FCGR2A/MAPK3/BAIAP2/VAV1/MYO9B/WIPF1/NF2/CYFIP2/HSP90AB1/LIMK1/PTK2/SYK/ABL1	14
R-HSA-76046	RNA Polymerase III Transcription Initiation	9/1829	36/10654	0.151935	0.578229	0.524662	POU2F1/POLR3B/GTF3A/POLR3K/POLR3E/POLR2E/POLR3H/POLR1C/TBP	9
R-HSA-140534	Caspase activation via Death Receptors in the presence of ligand	5/1829	17/10654	0.153199	0.578229	0.524662	CFLAR/TNFSF10/CD14/TNFRSF10B/LY96	5
R-HSA-164378	PKA activation in glucagon signalling	5/1829	17/10654	0.153199	0.578229	0.524662	ADCY4/PRKACA/ADCY3/PRKAR2A/ADCY1	5
R-HSA-450513	Tristetraprolin (TTP, ZFP36) binds and destabilizes mRNA	5/1829	17/10654	0.153199	0.578229	0.524662	MAPKAPK2/ZFP36/EXOSC5/EXOSC7/EXOSC4	5
R-HSA-450604	KSRP (KHSRP) binds and destabilizes mRNA	5/1829	17/10654	0.153199	0.578229	0.524662	AKT1/EXOSC5/MAPK11/EXOSC7/EXOSC4	5
R-HSA-9617828	FOXO-mediated transcription of cell cycle genes	5/1829	17/10654	0.153199	0.578229	0.524662	GADD45A/SMAD3/CCNG2/KLF4/FOXO4	5
R-HSA-380270	Recruitment of mitotic centrosome proteins and complexes	18/1829	82/10654	0.156873	0.588818	0.534271	SDCCAG8/ACTR1A/CENPJ/CCP110/TUBB4A/PRKACA/HAUS8/PPP2R1A/ALMS1/CLASP1/DYNC1I2/PCNT/CEP70/CEP135/PLK4/FGFR1OP/CNTRL/HAUS7	18
R-HSA-380287	Centrosome maturation	18/1829	82/10654	0.156873	0.588818	0.534271	SDCCAG8/ACTR1A/CENPJ/CCP110/TUBB4A/PRKACA/HAUS8/PPP2R1A/ALMS1/CLASP1/DYNC1I2/PCNT/CEP70/CEP135/PLK4/FGFR1OP/CNTRL/HAUS7	18
R-HSA-202403	TCR signaling	25/1829	119/10654	0.159516	0.597082	0.541769	PSMA5/PSMD13/PSMA1/UBE2N/NFKBIA/EVL/LAT/PSMD7/PSMB3/PSMD3/PSME3/PSMC5/PSMC4/VASP/PSMD1/PLCG1/PSMD2/LCP2/HLA-DRA/TAB2/PSMB1/CARD11/CUL1/PAG1/RIPK2	25
R-HSA-1445148	Translocation of SLC2A4 (GLUT4) to the plasma membrane	16/1829	72/10654	0.161788	0.60392	0.547973	RAB13/C2CD5/PRKAB1/TBC1D4/CALM2/CALM1/AKT1/TUBB3/TUBB4A/CALM3/RHOQ/TBC1D1/EXOC1/EXOC3/LNPEP/RALA	16
R-HSA-2979096	NOTCH2 Activation and Transmission of Signal to the Nucleus	6/1829	22/10654	0.162788	0.604314	0.54833	APH1A/PSEN2/ADAM10/JAG1/NEURL1B/DLL1	6
R-HSA-1169091	Activation of NF-kappaB in B cells	15/1829	67/10654	0.164109	0.604314	0.54833	PSMA5/PSMD13/PSMA1/NFKBIA/PSMD7/PSMB3/PSMD3/PSME3/PSMC5/PSMC4/PSMD1/PSMD2/PSMB1/CARD11/CUL1	15
R-HSA-380994	ATF4 activates genes in response to endoplasmic reticulum stress	7/1829	27/10654	0.168132	0.604314	0.54833	ATF3/HERPUD1/CCL2/EXOSC5/CEBPB/EXOSC7/EXOSC4	7
R-HSA-76066	RNA Polymerase III Transcription Initiation From Type 2 Promoter	7/1829	27/10654	0.168132	0.604314	0.54833	POLR3B/POLR3K/POLR3E/POLR2E/POLR3H/POLR1C/TBP	7
R-HSA-4641258	Degradation of DVL	13/1829	57/10654	0.168259	0.604314	0.54833	PSMA5/PSMD13/PSMA1/PSMD7/DVL2/PSMB3/PSMD3/PSME3/PSMC5/PSMC4/PSMD1/PSMD2/PSMB1	13
R-HSA-936837	Ion transport by P-type ATPases	13/1829	57/10654	0.168259	0.604314	0.54833	ATP13A2/ATP1A1/ATP2B4/CAMK2G/ATP2B1/CALM2/CALM1/ATP8B4/ATP8B1/ATP8B3/CALM3/ATP11B/CAMK2D	13
R-HSA-180534	Vpu mediated degradation of CD4	12/1829	52/10654	0.169953	0.604314	0.54833	PSMA5/PSMD13/PSMA1/PSMD7/PSMB3/PSMD3/PSME3/PSMC5/PSMC4/PSMD1/PSMD2/PSMB1	12
R-HSA-349425	Autodegradation of the E3 ubiquitin ligase COP1	12/1829	52/10654	0.169953	0.604314	0.54833	PSMA5/PSMD13/PSMA1/PSMD7/PSMB3/PSMD3/PSME3/PSMC5/PSMC4/PSMD1/PSMD2/PSMB1	12
R-HSA-383280	Nuclear Receptor transcription pathway	12/1829	52/10654	0.169953	0.604314	0.54833	NR1H3/ESRRA/PGR/RARG/NCOR2/NR2F6/NR4A2/PPARG/NR1D2/NR1I2/NR3C1/RXRA	12
R-HSA-69601	Ubiquitin Mediated Degradation of Phosphorylated Cdc25A	12/1829	52/10654	0.169953	0.604314	0.54833	PSMA5/PSMD13/PSMA1/PSMD7/PSMB3/PSMD3/PSME3/PSMC5/PSMC4/PSMD1/PSMD2/PSMB1	12
R-HSA-69610	p53-Independent DNA Damage Response	12/1829	52/10654	0.169953	0.604314	0.54833	PSMA5/PSMD13/PSMA1/PSMD7/PSMB3/PSMD3/PSME3/PSMC5/PSMC4/PSMD1/PSMD2/PSMB1	12
R-HSA-69613	p53-Independent G1/S DNA damage checkpoint	12/1829	52/10654	0.169953	0.604314	0.54833	PSMA5/PSMD13/PSMA1/PSMD7/PSMB3/PSMD3/PSME3/PSMC5/PSMC4/PSMD1/PSMD2/PSMB1	12
R-HSA-111461	Cytochrome c-mediated apoptotic response	4/1829	13/10654	0.171034	0.604314	0.54833	APAF1/UACA/MAPK3/CYCS	4
R-HSA-2046104	alpha-linolenic (omega3) and linoleic (omega6) acid metabolism	4/1829	13/10654	0.171034	0.604314	0.54833	ELOVL1/FADS2/ACOX1/ACSL1	4
R-HSA-2046106	alpha-linolenic acid (ALA) metabolism	4/1829	13/10654	0.171034	0.604314	0.54833	ELOVL1/FADS2/ACOX1/ACSL1	4
R-HSA-2564830	Cytosolic iron-sulfur cluster assembly	4/1829	13/10654	0.171034	0.604314	0.54833	CIAPIN1/ERCC2/POLD1/ABCB7	4
R-HSA-2995383	Initiation of Nuclear Envelope Reformation	4/1829	13/10654	0.171034	0.604314	0.54833	LMNA/PPP2R1A/LMNB1/LEMD2	4
R-HSA-2995410	Nuclear Envelope Reassembly	4/1829	13/10654	0.171034	0.604314	0.54833	LMNA/PPP2R1A/LMNB1/LEMD2	4
R-HSA-425561	Sodium/Calcium exchangers	4/1829	13/10654	0.171034	0.604314	0.54833	CALM2/CALM1/CALM3/SLC8A1	4
R-HSA-6806667	Metabolism of fat-soluble vitamins	11/1829	47/10654	0.171259	0.604314	0.54833	UBIAD1/HSPG2/SDC3/LRP8/AKR1C1/AKR1C3/LRP1/GPC1/SDC4/SDC2/LRP12	11
R-HSA-9024446	NR1H2 and NR1H3-mediated signaling	11/1829	47/10654	0.171259	0.604314	0.54833	SCD/NR1H3/NCOR2/GPS2/SREBF1/PLTP/NRIP1/EEPD1/ABCA1/RXRA/TBL1X	11
R-HSA-5083635	Defective B3GALTL causes Peters-plus syndrome (PpS)	9/1829	37/10654	0.172019	0.604359	0.548371	ADAMTS4/ADAMTS14/ADAMTS7/ADAMTS17/ADAMTS10/ADAMTS3/ADAMTS2/THSD7A/CFP	9
R-HSA-5617833	Cilium Assembly	40/1829	201/10654	0.172164	0.604359	0.548371	KIF17/CCT3/SDCCAG8/ACTR1A/ARL3/C2CD3/DYNC2H1/IFT81/IFT88/CENPJ/TTBK2/CCP110/TUBB3/TUBB4A/PRKACA/HAUS8/PPP2R1A/KIF3C/ALMS1/CLASP1/DYNC1I2/TTC30A/MKKS/PCNT/LZTFL1/NPHP3/CEP70/IFT80/WDR19/EXOC1/CEP135/PKD2/PLK4/EXOC3/FGFR1OP/WDR60/ASAP1/CNTRL/HDAC6/HAUS7	40
R-HSA-380320	Recruitment of NuMA to mitotic centrosomes	20/1829	94/10654	0.176433	0.617743	0.560516	SDCCAG8/ACTR1A/NUMA1/CENPJ/CCP110/TUBB3/TUBB4A/PRKACA/HAUS8/PPP2R1A/ALMS1/CLASP1/DYNC1I2/PCNT/CEP70/CEP135/PLK4/FGFR1OP/CNTRL/HAUS7	20
R-HSA-5687128	MAPK6/MAPK4 signaling	19/1829	89/10654	0.180006	0.628628	0.570393	CDC14A/PSMA5/PSMD13/PSMA1/MAPK6/PSMD7/PSMB3/PSMD3/PSME3/PSMC5/PRKACA/PSMC4/CDC42EP3/XPO1/PSMD1/PSMD2/CCND3/PSMB1/HSPB1	19
R-HSA-1834949	Cytosolic sensors of pathogen-associated DNA	14/1829	63/10654	0.182037	0.629334	0.571033	NFKB2/IRF7/DTX4/POLR3B/RIPK3/NFKBIA/POLR3K/NLRC3/POLR3E/POLR2E/LRRFIP1/POLR3H/TREX1/POLR1C	14
R-HSA-1368082	RORA activates gene expression	5/1829	18/10654	0.18387	0.629334	0.571033	CPT1A/SREBF1/HELZ2/RXRA/TBL1X	5
R-HSA-1660514	Synthesis of PIPs at the Golgi membrane	5/1829	18/10654	0.18387	0.629334	0.571033	ARF1/PI4K2A/ARF3/PI4KA/FIG4	5
R-HSA-2022377	Metabolism of Angiotensinogen to Angiotensins	5/1829	18/10654	0.18387	0.629334	0.571033	CTSD/ANPEP/CES1/ACE/CTSZ	5
R-HSA-936964	Activation of IRF3/IRF7 mediated by TBK1/IKK epsilon	5/1829	18/10654	0.18387	0.629334	0.571033	IKBKE/IRF7/TRAF3/CD14/LY96	5
R-HSA-2644602	Signaling by NOTCH1 PEST Domain Mutants in Cancer	13/1829	58/10654	0.184852	0.629334	0.571033	HEYL/APH1A/PSEN2/NCOR2/ADAM10/JAG1/RBPJ/NEURL1B/MAML1/DLL1/CUL1/TBL1X/HDAC6	13
R-HSA-2644603	Signaling by NOTCH1 in Cancer	13/1829	58/10654	0.184852	0.629334	0.571033	HEYL/APH1A/PSEN2/NCOR2/ADAM10/JAG1/RBPJ/NEURL1B/MAML1/DLL1/CUL1/TBL1X/HDAC6	13
R-HSA-2644606	Constitutive Signaling by NOTCH1 PEST Domain Mutants	13/1829	58/10654	0.184852	0.629334	0.571033	HEYL/APH1A/PSEN2/NCOR2/ADAM10/JAG1/RBPJ/NEURL1B/MAML1/DLL1/CUL1/TBL1X/HDAC6	13
R-HSA-2894858	Signaling by NOTCH1 HD+PEST Domain Mutants in Cancer	13/1829	58/10654	0.184852	0.629334	0.571033	HEYL/APH1A/PSEN2/NCOR2/ADAM10/JAG1/RBPJ/NEURL1B/MAML1/DLL1/CUL1/TBL1X/HDAC6	13
R-HSA-2894862	Constitutive Signaling by NOTCH1 HD+PEST Domain Mutants	13/1829	58/10654	0.184852	0.629334	0.571033	HEYL/APH1A/PSEN2/NCOR2/ADAM10/JAG1/RBPJ/NEURL1B/MAML1/DLL1/CUL1/TBL1X/HDAC6	13
R-HSA-109606	Intrinsic Pathway for Apoptosis	12/1829	53/10654	0.187488	0.632784	0.574163	APAF1/AKT1/UACA/MAPK3/C1QBP/NMT1/BCL2/BBC3/BCL2L11/BID/BAK1/CYCS	12
R-HSA-169911	Regulation of Apoptosis	12/1829	53/10654	0.187488	0.632784	0.574163	PSMA5/PSMD13/PSMA1/PSMD7/PSMB3/PSMD3/PSME3/PSMC5/PSMC4/PSMD1/PSMD2/PSMB1	12
R-HSA-73893	DNA Damage Bypass	11/1829	48/10654	0.189859	0.632784	0.574163	ISG15/MAD2L2/RPA2/USP1/DDB1/USP10/TRIM25/POLI/POLD1/WDR48/RCHY1	11
R-HSA-428930	Thromboxane signalling through TP receptor	6/1829	23/10654	0.190217	0.632784	0.574163	GNG5/GNG4/GNB5/GNG7/GNA15/TBXA2R	6
R-HSA-438066	Unblocking of NMDA receptors, glutamate binding and activation	6/1829	23/10654	0.190217	0.632784	0.574163	CAMK2G/CALM2/CALM1/CALM3/GRIN2D/CAMK2D	6
R-HSA-8956321	Nucleotide salvage	6/1829	23/10654	0.190217	0.632784	0.574163	CDA/AMPD2/PNP/ADAL/UCKL1/TYMP	6
R-HSA-1296072	Voltage gated Potassium channels	10/1829	43/10654	0.19184	0.632784	0.574163	KCNAB2/KCNA3/KCNQ1/KCNC3/KCNF1/KCNG1/KCNQ5/KCNH2/KCNQ3/KCND1	10
R-HSA-2172127	DAP12 interactions	10/1829	43/10654	0.19184	0.632784	0.574163	VAV3/LAT/PLCG2/CD300LB/SIRPB1/PLCG1/LCP2/TREM1/FYN/SYK	10
R-HSA-5362517	Signaling by Retinoic Acid	10/1829	43/10654	0.19184	0.632784	0.574163	DHRS3/AKR1C3/CPT1A/DLAT/RARG/RDH13/CYP26B1/DHRS9/DLD/RXRA	10
R-HSA-975634	Retinoid metabolism and transport	10/1829	43/10654	0.19184	0.632784	0.574163	HSPG2/SDC3/LRP8/AKR1C1/AKR1C3/LRP1/GPC1/SDC4/SDC2/LRP12	10
R-HSA-2022854	Keratan sulfate biosynthesis	7/1829	28/10654	0.193052	0.632784	0.574163	B4GALT3/ST3GAL4/ST3GAL2/B3GNT7/B4GALT5/ST3GAL6/ST3GAL1	7
R-HSA-111465	Apoptotic cleavage of cellular proteins	9/1829	38/10654	0.19325	0.632784	0.574163	LMNA/VIM/OCLN/LMNB1/DBNL/PTK2/PLEC/TJP2/GSN	9
R-HSA-5173214	O-glycosylation of TSR domain-containing proteins	9/1829	38/10654	0.19325	0.632784	0.574163	ADAMTS4/ADAMTS14/ADAMTS7/ADAMTS17/ADAMTS10/ADAMTS3/ADAMTS2/THSD7A/CFP	9
R-HSA-8864260	Transcriptional regulation by the AP-2 (TFAP2) family of transcription factors	9/1829	38/10654	0.19325	0.632784	0.574163	CITED4/NOP2/WWOX/KCTD15/HSPD1/TFAP2C/KIT/VEGFA/CITED2	9
R-HSA-163359	Glucagon signaling in metabolic regulation	8/1829	33/10654	0.193805	0.632784	0.574163	GNG5/GNG4/ADCY4/GNG7/PRKACA/ADCY3/PRKAR2A/ADCY1	8
R-HSA-389356	CD28 co-stimulation	8/1829	33/10654	0.193805	0.632784	0.574163	MTOR/AKT1/YES1/VAV1/PRR5/FYN/LYN/MAPKAP1	8
R-HSA-445989	TAK1 activates NFkB by phosphorylation and activation of IKKs complex	8/1829	33/10654	0.193805	0.632784	0.574163	NFKB2/UBE2N/HMGB1/NFKBIA/NOD2/TAB2/RIPK2/IRAK1	8
R-HSA-1257604	PIP3 activates AKT signaling	51/1829	264/10654	0.194728	0.634269	0.575511	MTOR/PHC2/RRAGC/PSMA5/PIP5K1A/BMI1/PIK3AP1/PSMD13/PSMA1/RCOR1/AKT1/MAPK3/PSMD7/PSMB3/PSMD3/PSME3/PSMC5/CBX2/PIP5K1C/VAV1/INSR/PSMC4/PPP2R1A/ATF2/IRS1/PSMD1/SNAI1/RAC2/CBX6/PDGFB/PRR5/PPARG/PSMD2/IL1RAP/FGFR3/PDGFRA/KIT/GAB1/NRG2/HBEGF/FGFR4/TRIM27/RRAGD/FYN/PSMB1/PDGFA/FGFR1/PIP5K1B/MAPKAP1/FOXO4/IRAK1	51
R-HSA-5632684	Hedgehog 'on' state	18/1829	85/10654	0.197821	0.642798	0.58325	PSMA5/GPR161/PSMD13/PSMA1/PSMD7/ARRB2/PSMB3/PSMD3/PSME3/PSMC5/PSMC4/PSMD1/ITCH/PSMD2/EVC/PSMB1/IQCE/PTCH1	18
R-HSA-2142753	Arachidonic acid metabolism	13/1829	59/10654	0.202189	0.655421	0.594703	MAPKAPK2/AKR1C3/ALOX5/LTA4H/ABCC1/CYP1B1/GGT1/GPX1/LTC4S/TBXAS1/EPHX2/PTGS1/PTGES2	13
R-HSA-180585	Vif-mediated degradation of APOBEC3G	12/1829	54/10654	0.205823	0.659619	0.598512	PSMA5/PSMD13/PSMA1/PSMD7/PSMB3/PSMD3/PSME3/PSMC5/PSMC4/PSMD1/PSMD2/PSMB1	12
R-HSA-8848021	Signaling by PTK6	12/1829	54/10654	0.205823	0.659619	0.598512	CCND1/CBL/PXN/AKT1/BCAR1/SOCS3/PTK6/RASA1/NRG2/HBEGF/NR3C1/KHDRBS3	12
R-HSA-9006927	Signaling by Non-Receptor Tyrosine Kinases	12/1829	54/10654	0.205823	0.659619	0.598512	CCND1/CBL/PXN/AKT1/BCAR1/SOCS3/PTK6/RASA1/NRG2/HBEGF/NR3C1/KHDRBS3	12
R-HSA-170670	Adenylate cyclase inhibitory pathway	4/1829	14/10654	0.208814	0.659619	0.598512	ADCY4/ADCY3/ADCY1/GNAI1	4
R-HSA-174490	Membrane binding and targetting of GAG proteins	4/1829	14/10654	0.208814	0.659619	0.598512	VPS37B/MVB12A/VPS37D/MVB12B	4
R-HSA-174495	Synthesis And Processing Of GAG, GAGPOL Polyproteins	4/1829	14/10654	0.208814	0.659619	0.598512	VPS37B/MVB12A/VPS37D/MVB12B	4
R-HSA-6804116	TP53 Regulates Transcription of Genes Involved in G1 Cell Cycle Arrest	4/1829	14/10654	0.208814	0.659619	0.598512	E2F8/E2F7/CCNA1/CCNE2	4
R-HSA-6804759	Regulation of TP53 Activity through Association with Co-factors	4/1829	14/10654	0.208814	0.659619	0.598512	POU4F1/AKT1/BANP/POU4F2	4
R-HSA-8849471	PTK6 Regulates RHO GTPases, RAS GTPase and MAP kinases	4/1829	14/10654	0.208814	0.659619	0.598512	PXN/BCAR1/PTK6/RASA1	4
R-HSA-8941856	RUNX3 regulates NOTCH signaling	4/1829	14/10654	0.208814	0.659619	0.598512	RUNX3/JAG1/RBPJ/MAML1	4
R-HSA-177929	Signaling by EGFR	11/1829	49/10654	0.209325	0.659619	0.598512	CBL/PXN/ADAM10/EPN1/PLCG1/LRIG1/GAB1/HBEGF/PTPN12/PAG1/SH3KBP1	11
R-HSA-9012852	Signaling by NOTCH3	11/1829	49/10654	0.209325	0.659619	0.598512	HEYL/APH1A/PSEN2/ADAM10/STAT1/JAG1/RBPJ/WWC1/NEURL1B/MAML1/DLL1	11
R-HSA-9006936	Signaling by TGF-beta family members	21/1829	102/10654	0.211953	0.663374	0.601919	BAMBI/DRAP1/CBL/ACVRL1/ACVR1B/NCOR2/SMAD3/FURIN/E2F4/NOG/MTMR4/TGIF1/SMAD7/FSTL3/UBE2M/XPO1/ACVR1C/FKBP1A/BMP2/SERPINE1/TGFBR1	21
R-HSA-5633008	TP53 Regulates Transcription of Cell Death Genes	10/1829	44/10654	0.212607	0.663374	0.601919	AIFM2/APAF1/BBC3/TP53I3/STEAP3/BID/BCL6/TNFRSF10B/BNIP3L/TP53INP1	10
R-HSA-6811438	Intra-Golgi traffic	10/1829	44/10654	0.212607	0.663374	0.601919	STX6/ARF1/COG2/BET1L/MAN2A2/CYTH4/MAN1A1/CYTH3/YKT6/CUX1	10
R-HSA-163841	Gamma carboxylation, hypusine formation and arylsulfatase activation	9/1829	39/10654	0.215532	0.663374	0.601919	DPH2/DPH5/GAS6/FURIN/ARSG/FN3KRP/EEF2/GGCX/STS	9
R-HSA-3000480	Scavenging by Class A Receptors	5/1829	19/10654	0.216542	0.663374	0.601919	HSP90B1/COL1A1/CALR/FTL/MARCO	5
R-HSA-392851	Prostacyclin signalling through prostacyclin receptor	5/1829	19/10654	0.216542	0.663374	0.601919	GNG5/GNG4/GNB5/GNG7/PTGIR	5
R-HSA-416700	Other semaphorin interactions	5/1829	19/10654	0.216542	0.663374	0.601919	PLXNC1/PLXNA1/SEMA6A/PLXNA4/SEMA4D	5
R-HSA-5686938	Regulation of TLR by endogenous ligand	5/1829	19/10654	0.216542	0.663374	0.601919	HMGB1/TLR2/CD14/CD36/LY96	5
R-HSA-74259	Purine catabolism	5/1829	19/10654	0.216542	0.663374	0.601919	PNP/NT5C/ITPA/GPX1/NUDT16	5
R-HSA-8876725	Protein methylation	5/1829	19/10654	0.216542	0.663374	0.601919	CALM2/CALM1/EEF2/CALM3/METTL21A	5
R-HSA-1638074	Keratan sulfate/keratin metabolism	8/1829	34/10654	0.217888	0.663374	0.601919	B4GALT3/ST3GAL4/GNS/ST3GAL2/B3GNT7/B4GALT5/ST3GAL6/ST3GAL1	8
R-HSA-193368	Synthesis of bile acids and bile salts via 7alpha-hydroxycholesterol	6/1829	24/10654	0.219256	0.663374	0.601919	AKR1C2/AKR1C1/AKR1C3/SLC27A2/HSD3B7/RXRA	6
R-HSA-5668599	RHO GTPases Activate NADPH Oxidases	6/1829	24/10654	0.219256	0.663374	0.601919	NOXO1/MAPK3/NCF4/RAC2/MAPK11/NOXA1	6
R-HSA-6783589	Interleukin-6 family signaling	6/1829	24/10654	0.219256	0.663374	0.601919	CBL/SOCS3/TYK2/STAT1/OSM/IL6ST	6
R-HSA-933542	TRAF6 mediated NF-kB activation	6/1829	24/10654	0.219256	0.663374	0.601919	NFKB2/HMGB1/NFKBIA/RNF135/TRIM25/IFIH1	6
R-HSA-162588	Budding and maturation of HIV virion	7/1829	29/10654	0.219329	0.663374	0.601919	VPS37B/VPS4A/MVB12A/CHMP4B/VPS37D/CHMP5/MVB12B	7
R-HSA-5205647	Mitophagy	7/1829	29/10654	0.219329	0.663374	0.601919	MFN2/PINK1/TOMM40/MAP1LC3A/TOMM22/VDAC1/ATG5	7
R-HSA-9615017	FOXO-mediated transcription of oxidative stress, metabolic and neuronal genes	7/1829	29/10654	0.219329	0.663374	0.601919	CAT/SMAD3/SREBF1/NR3C1/SOD2/PLXNA4/FOXO4	7
R-HSA-163685	Integration of energy metabolism	22/1829	108/10654	0.220411	0.66516	0.60354	GNG5/GNG4/ADRA2A/ITPR2/ADCY4/PLCB2/GNB5/GNG7/GNA15/PRKACA/PPP2R1A/ADCY3/ITPR1/PRKAR2A/TKT/AGPAT1/MARCKS/ADCY1/MLXIPL/STX1A/GNAI1/CD36	22
R-HSA-4086400	PCP/CE pathway	19/1829	92/10654	0.222261	0.669254	0.607254	PSMA5/PSMD13/PSMA1/PRICKLE1/DAAM1/PSMD7/ARRB2/DVL2/PSMB3/PSMD3/PSME3/PSMC5/RAC3/PSMC4/FZD7/PSMD1/RAC2/PSMD2/PSMB1	19
R-HSA-4641257	Degradation of AXIN	12/1829	55/10654	0.224901	0.675701	0.613104	PSMA5/PSMD13/PSMA1/PSMD7/PSMB3/PSMD3/PSME3/PSMC5/PSMC4/PSMD1/PSMD2/PSMB1	12
R-HSA-6794362	Protein-protein interactions at synapses	18/1829	87/10654	0.227693	0.680078	0.617076	PTPRF/SYT2/PPFIA4/PPFIA1/SLITRK5/BEGAIN/APBA2/HOMER2/PTPRS/GRIN2D/SHANK1/EPB41L1/IL1RAP/PDLIM5/FLOT1/DBNL/STX1A/NLGN4Y	18
R-HSA-68949	Orc1 removal from chromatin	15/1829	71/10654	0.227864	0.680078	0.617076	PSMA5/PSMD13/PSMA1/CCNA1/PSMD7/PSMB3/PSMD3/PSME3/PSMC5/PSMC4/PSMD1/PSMD2/MCM3/PSMB1/CUL1	15
R-HSA-70171	Glycolysis	15/1829	71/10654	0.227864	0.680078	0.617076	PFKFB2/HK1/PGAM1/PGM2L1/PFKM/PKM/PGP/NUP93/PRKACA/GPI/PPP2R1A/NUP210/PFKFB4/PGAM2/POM121	15
R-HSA-381038	XBP1(S) activates chaperone genes	11/1829	50/10654	0.229591	0.683727	0.620387	EXTL2/LMNA/SYVN1/CTDSP2/ATP6V0D1/PREB/EDEM1/SRPRB/CUL7/EXTL3/TSPYL2	11
R-HSA-5620912	Anchoring of the basal body to the plasma membrane	20/1829	98/10654	0.231428	0.687687	0.62398	SDCCAG8/ACTR1A/C2CD3/CENPJ/TTBK2/CCP110/TUBB4A/PRKACA/HAUS8/PPP2R1A/ALMS1/CLASP1/DYNC1I2/PCNT/CEP70/CEP135/PLK4/FGFR1OP/CNTRL/HAUS7	20
R-HSA-69563	p53-Dependent G1 DNA Damage Response	14/1829	66/10654	0.233299	0.690219	0.626277	PSMA5/PSMD13/PSMA1/CCNA1/PSMD7/PSMB3/PSMD3/PSME3/PSMC5/PSMC4/PSMD1/PSMD2/PSMB1/CCNE2	14
R-HSA-69580	p53-Dependent G1/S DNA damage checkpoint	14/1829	66/10654	0.233299	0.690219	0.626277	PSMA5/PSMD13/PSMA1/CCNA1/PSMD7/PSMB3/PSMD3/PSME3/PSMC5/PSMC4/PSMD1/PSMD2/PSMB1/CCNE2	14
R-HSA-110056	MAPK3 (ERK1) activation	3/1829	10/10654	0.238805	0.692893	0.628704	MAPK3/TYK2/IL6ST	3
R-HSA-170660	Adenylate cyclase activating pathway	3/1829	10/10654	0.238805	0.692893	0.628704	ADCY4/ADCY3/ADCY1	3
R-HSA-2562578	TRIF-mediated programmed cell death	3/1829	10/10654	0.238805	0.692893	0.628704	RIPK3/CD14/LY96	3
R-HSA-390450	Folding of actin by CCT/TriC	3/1829	10/10654	0.238805	0.692893	0.628704	CCT3/CCT7/CCT6A	3
R-HSA-399997	Acetylcholine regulates insulin secretion	3/1829	10/10654	0.238805	0.692893	0.628704	PLCB2/GNA15/MARCKS	3
R-HSA-442380	Zinc influx into cells by the SLC39 gene family	3/1829	10/10654	0.238805	0.692893	0.628704	SLC39A10/SLC39A8/SLC39A7	3
R-HSA-74749	Signal attenuation	3/1829	10/10654	0.238805	0.692893	0.628704	MAPK3/INSR/IRS1	3
R-HSA-8866904	Negative regulation of activity of TFAP2 (AP-2) family transcription factors	3/1829	10/10654	0.238805	0.692893	0.628704	WWOX/KCTD15/TFAP2C	3
R-HSA-975578	Reactions specific to the complex N-glycan synthesis pathway	3/1829	10/10654	0.238805	0.692893	0.628704	FUCA1/MGAT2/MAN2A2	3
R-HSA-2424491	DAP12 signaling	7/1829	30/10654	0.246781	0.705766	0.640384	VAV3/LAT/PLCG2/PLCG1/LCP2/FYN/SYK	7
R-HSA-499943	Interconversion of nucleotide di- and triphosphates	7/1829	30/10654	0.246781	0.705766	0.640384	CTPS1/TXNRD1/NME4/DCTPP1/RRM2/GSR/RRM2B	7
R-HSA-2162123	Synthesis of Prostaglandins (PG) and Thromboxanes (TX)	4/1829	15/10654	0.24865	0.705766	0.640384	AKR1C3/TBXAS1/PTGS1/PTGES2	4
R-HSA-2691230	Signaling by NOTCH1 HD Domain Mutants in Cancer	4/1829	15/10654	0.24865	0.705766	0.640384	ADAM10/JAG1/NEURL1B/DLL1	4
R-HSA-2691232	Constitutive Signaling by NOTCH1 HD Domain Mutants	4/1829	15/10654	0.24865	0.705766	0.640384	ADAM10/JAG1/NEURL1B/DLL1	4
R-HSA-71336	Pentose phosphate pathway	4/1829	15/10654	0.24865	0.705766	0.640384	PGLS/RBKS/TKT/G6PD	4
R-HSA-75892	Platelet Adhesion to exposed collagen	4/1829	15/10654	0.24865	0.705766	0.640384	FCER1G/COL1A1/FYN/LYN	4
R-HSA-8956320	Nucleobase biosynthesis	4/1829	15/10654	0.24865	0.705766	0.640384	DHODH/PFAS/ATIC/UMPS	4
R-HSA-210991	Basigin interactions	6/1829	25/10654	0.249646	0.705766	0.640384	SLC7A7/SPN/SLC7A5/SLC16A3/ITGA6/SLC7A11	6
R-HSA-8854691	Interleukin-20 family signaling	6/1829	25/10654	0.249646	0.705766	0.640384	STAT2/STAT5B/STAT5A/TYK2/STAT1/STAT4	6
R-HSA-9013507	NOTCH3 Activation and Transmission of Signal to the Nucleus	6/1829	25/10654	0.249646	0.705766	0.640384	APH1A/PSEN2/ADAM10/JAG1/NEURL1B/DLL1	6
R-HSA-3781865	Diseases of glycosylation	28/1829	143/10654	0.250732	0.705766	0.640384	HSPG2/SDC3/PGM1/MUC1/ADAMTS4/ADAMTS14/CHST3/DPAGT1/MGAT2/POMT2/CSPG4/ADAMTS7/ADAMTS17/PMM2/ADAMTS10/GPC1/SDC4/RFT1/ALG3/SRD5A3/ADAMTS3/SLC26A2/ADAMTS2/LFNG/THSD7A/SDC2/EXT1/CFP	28
R-HSA-167044	Signalling to RAS	5/1829	20/10654	0.250828	0.705766	0.640384	MAPKAPK2/MAPK11/MAPK13/RALA/RALGDS	5
R-HSA-418217	G beta:gamma signalling through PLC beta	5/1829	20/10654	0.250828	0.705766	0.640384	GNG5/GNG4/PLCB2/GNB5/GNG7	5
R-HSA-1650814	Collagen biosynthesis and modifying enzymes	14/1829	67/10654	0.251576	0.705766	0.640384	COL8A2/COL24A1/ADAMTS14/COL1A1/P4HB/COL18A1/COL6A1/CRTAP/COL7A1/PLOD2/ADAMTS3/ADAMTS2/COL12A1/COL15A1	14
R-HSA-6802952	Signaling by BRAF and RAF fusions	14/1829	67/10654	0.251576	0.705766	0.640384	AGTRAP/LMNA/APBB1IP/CAMK2G/CALM2/CALM1/MARK3/MAPK3/ARRB2/CALM3/BCL2L11/TRAK1/CAMK2D/ARAF	14
R-HSA-168928	DDX58/IFIH1-mediated induction of interferon-alpha/beta	16/1829	78/10654	0.25624	0.717367	0.650911	ISG15/IKBKE/NFKB2/IRF7/HMGB1/NFKBIA/TRAF3/NLRC5/RNF135/DHX58/TRIM25/RNF125/IFIH1/ITCH/ATG5/TNFAIP3	16
R-HSA-4086398	Ca2+ pathway	13/1829	62/10654	0.258163	0.72126	0.654443	GNG5/GNG4/ITPR2/CALM2/CALM1/PLCB2/GNB5/NFATC1/GNG7/CALM3/ITPR1/PPP3CA/TCF7	13
R-HSA-3560782	Diseases associated with glycosaminoglycan metabolism	9/1829	41/10654	0.262813	0.732739	0.664858	HSPG2/SDC3/CHST3/CSPG4/GPC1/SDC4/SLC26A2/SDC2/EXT1	9
R-HSA-69541	Stabilization of p53	12/1829	57/10654	0.265034	0.737416	0.669102	PSMA5/PSMD13/PSMA1/PSMD7/PSMB3/PSMD3/PSME3/PSMC5/PSMC4/PSMD1/PSMD2/PSMB1	12
R-HSA-1222556	ROS and RNS production in phagocytes	8/1829	36/10654	0.269038	0.743974	0.675052	ATP6V0B/HVCN1/ATP6V0D1/LPO/SLC11A1/NCF4/RAC2/ATP6V0E2	8
R-HSA-5579029	Metabolic disorders of biological oxidation enzymes	8/1829	36/10654	0.269038	0.743974	0.675052	CYP19A1/CYP1B1/CYP26B1/AHCY/GGT1/TPMT/TBXAS1/OPLAH	8
R-HSA-6804757	Regulation of TP53 Degradation	8/1829	36/10654	0.269038	0.743974	0.675052	MTOR/USP2/CCNA1/AKT1/PPP2R1A/PRR5/SGK1/MAPKAP1	8
R-HSA-69615	G1/S DNA Damage Checkpoints	14/1829	68/10654	0.270365	0.746118	0.676999	PSMA5/PSMD13/PSMA1/CCNA1/PSMD7/PSMB3/PSMD3/PSME3/PSMC5/PSMC4/PSMD1/PSMD2/PSMB1/CCNE2	14
R-HSA-381070	IRE1alpha activates chaperones	11/1829	52/10654	0.272211	0.746652	0.677483	EXTL2/LMNA/SYVN1/CTDSP2/ATP6V0D1/PREB/EDEM1/SRPRB/CUL7/EXTL3/TSPYL2	11
R-HSA-445717	Aquaporin-mediated transport	11/1829	52/10654	0.272211	0.746652	0.677483	GNG5/GNG4/ADCY4/GNB5/GNG7/PRKACA/ADCY3/PRKAR2A/ADCY1/AQP3/AVPR2	11
R-HSA-75153	Apoptotic execution phase	11/1829	52/10654	0.272211	0.746652	0.677483	LMNA/VIM/HMGB1/HMGB2/OCLN/LMNB1/DBNL/PTK2/PLEC/TJP2/GSN	11
R-HSA-2022928	HS-GAG biosynthesis	7/1829	31/10654	0.27521	0.752526	0.682813	HSPG2/SDC3/GPC1/SDC4/NDST1/SDC2/EXT1	7
R-HSA-2219528	PI3K/AKT Signaling in Cancer	20/1829	101/10654	0.276967	0.752526	0.682813	MTOR/PIK3AP1/AKT1/VAV1/IRS1/RAC2/PDGFB/PRR5/FGFR3/PDGFRA/KIT/GAB1/NRG2/HBEGF/FGFR4/FYN/PDGFA/FGFR1/MAPKAP1/FOXO4	20
R-HSA-5173105	O-linked glycosylation	22/1829	112/10654	0.277446	0.752526	0.682813	MUC1/ADAMTS4/GALNT2/ADAMTS14/ST3GAL4/POMT2/ADAMTS7/ADAMTS17/ST3GAL2/B3GNTL1/ADAMTS10/B3GNT8/B3GNT7/B4GALT5/B3GNT5/ADAMTS3/ADAMTS2/THSD7A/ST3GAL1/GCNT1/ST6GALNAC4/CFP	22
R-HSA-425407	SLC-mediated transmembrane transport	47/1829	251/10654	0.277825	0.752526	0.682813	SLC9A1/SLC35A3/SLC22A15/SLC45A3/SLC30A1/SLC35C1/SLC6A12/SLC38A2/SLC11A2/SLC7A7/CALM2/CALM1/SLC25A29/SLCO3A1/ARL2BP/SLC7A5/SLC43A2/SLC16A3/SLC27A1/CALM3/SLC1A5/SLC17A7/SLC5A6/SLC8A1/SLC1A4/SLC39A10/SLC11A1/SLC6A6/SLC4A7/SLC39A8/SLC7A11/SLC25A4/SLC9A3/SLC1A3/EMB/SLCO4C1/SLC26A2/SLC36A1/SLC39A7/SLC29A1/SLC7A2/SLC20A2/SLC44A1/SLC31A1/SLC34A3/SLC16A2/SLC25A5	47
R-HSA-2122947	NOTCH1 Intracellular Domain Regulates Transcription	10/1829	47/10654	0.279716	0.752526	0.682813	HEYL/NCOR2/TLE3/RBPJ/MAML1/CUL1/TLE4/TLE1/TBL1X/HDAC6	10
R-HSA-437239	Recycling pathway of L1	10/1829	47/10654	0.279716	0.752526	0.682813	RPS6KA1/DNM3/RPS6KA4/RPS6KA5/TUBB3/TUBB4A/EZR/DPYSL2/RPS6KA3/MSN	10
R-HSA-2173788	Downregulation of TGF-beta receptor signaling	6/1829	26/10654	0.281117	0.752526	0.682813	BAMBI/SMAD3/MTMR4/SMAD7/XPO1/TGFBR1	6
R-HSA-901042	Calnexin/calreticulin cycle	6/1829	26/10654	0.281117	0.752526	0.682813	SYVN1/OS9/TRIM13/CALR/EDEM1/RNF139	6
R-HSA-912694	Regulation of IFNA signaling	6/1829	26/10654	0.281117	0.752526	0.682813	PTPN6/STAT2/SOCS1/SOCS3/TYK2/STAT1	6
R-HSA-6807505	RNA polymerase II transcribes snRNA genes	15/1829	74/10654	0.281473	0.752526	0.682813	RPAP2/RPRD2/POU2F1/INTS7/PCF11/POLR2E/GTF2F1/ELL/POU2F2/NABP1/TAF9/ELL2/TBP/INTS10/INTS9	15
R-HSA-389513	CTLA4 inhibitory signaling	5/1829	21/10654	0.286335	0.752526	0.682813	AKT1/YES1/PPP2R1A/FYN/LYN	5
R-HSA-445144	Signal transduction by L1	5/1829	21/10654	0.286335	0.752526	0.682813	NCAM1/ITGA5/MAPK3/ITGA9/FGFR1	5
R-HSA-500657	Presynaptic function of Kainate receptors	5/1829	21/10654	0.286335	0.752526	0.682813	GNG5/GNG4/PLCB2/GNB5/GNG7	5
R-HSA-901032	ER Quality Control Compartment (ERQC)	5/1829	21/10654	0.286335	0.752526	0.682813	SYVN1/OS9/TRIM13/EDEM1/RNF139	5
R-HSA-3769402	Deactivation of the beta-catenin transactivating complex	9/1829	42/10654	0.287573	0.752526	0.682813	CTNNBIP1/BCL9L/AKT1/TLE3/XPO1/TCF7/SOX7/TLE4/TLE1	9
R-HSA-1234158	Regulation of gene expression by Hypoxia-inducible Factor	3/1829	11/10654	0.289281	0.752526	0.682813	HIGD1A/VEGFA/CITED2	3
R-HSA-159854	Gamma-carboxylation, transport, and amino-terminal cleavage of proteins	3/1829	11/10654	0.289281	0.752526	0.682813	GAS6/FURIN/GGCX	3
R-HSA-1660517	Synthesis of PIPs at the late endosome membrane	3/1829	11/10654	0.289281	0.752526	0.682813	MTMR4/FIG4/MTM1	3
R-HSA-2206281	Mucopolysaccharidoses	3/1829	11/10654	0.289281	0.752526	0.682813	GNS/NAGLU/IDUA	3
R-HSA-3371378	Regulation by c-FLIP	3/1829	11/10654	0.289281	0.752526	0.682813	CFLAR/TNFSF10/TNFRSF10B	3
R-HSA-400451	Free fatty acids regulate insulin secretion	3/1829	11/10654	0.289281	0.752526	0.682813	PLCB2/GNA15/CD36	3
R-HSA-5218900	CASP8 activity is inhibited	3/1829	11/10654	0.289281	0.752526	0.682813	CFLAR/TNFSF10/TNFRSF10B	3
R-HSA-5655291	Signaling by FGFR4 in disease	3/1829	11/10654	0.289281	0.752526	0.682813	PLCG1/GAB1/FGFR4	3
R-HSA-69416	Dimerization of procaspase-8	3/1829	11/10654	0.289281	0.752526	0.682813	CFLAR/TNFSF10/TNFRSF10B	3
R-HSA-73614	Pyrimidine salvage	3/1829	11/10654	0.289281	0.752526	0.682813	CDA/UCKL1/TYMP	3
R-HSA-8948751	Regulation of PTEN stability and activity	14/1829	69/10654	0.289612	0.752526	0.682813	PSMA5/PSMD13/PSMA1/AKT1/PSMD7/PSMB3/PSMD3/PSME3/PSMC5/PSMC4/PSMD1/PSMD2/TRIM27/PSMB1	14
R-HSA-3322077	Glycogen synthesis	4/1829	16/10654	0.289903	0.752526	0.682813	PGM1/PGM2L1/GBE1/GYG1	4
R-HSA-8949664	Processing of SMDT1	4/1829	16/10654	0.289903	0.752526	0.682813	PHB2/PHB/AFG3L2/PARL	4
R-HSA-6806003	Regulation of TP53 Expression and Degradation	8/1829	37/10654	0.295803	0.763452	0.692727	MTOR/USP2/CCNA1/AKT1/PPP2R1A/PRR5/SGK1/MAPKAP1	8
R-HSA-8956319	Nucleobase catabolism	8/1829	37/10654	0.295803	0.763452	0.692727	ENTPD7/PNP/NT5C/ITPA/TYMP/GPX1/NUDT16/ENTPD8	8
R-HSA-9029569	NR1H3 & NR1H2 regulate gene expression linked to cholesterol transport and efflux	8/1829	37/10654	0.295803	0.763452	0.692727	NR1H3/NCOR2/GPS2/PLTP/EEPD1/ABCA1/RXRA/TBL1X	8
R-HSA-1442490	Collagen degradation	13/1829	64/10654	0.298213	0.768211	0.697044	COL8A2/CTSD/MMP19/ADAM10/FURIN/COL1A1/MMP9/COL18A1/COL6A1/COL7A1/COL12A1/CTSB/COL15A1	13
R-HSA-1234174	Cellular response to hypoxia	15/1829	75/10654	0.300209	0.76998	0.698649	PSMA5/PSMD13/PSMA1/PSMD7/PSMB3/PSMD3/PSME3/PSMC5/PSMC4/PSMD1/HIGD1A/PSMD2/VEGFA/CITED2/PSMB1	15
R-HSA-2219530	Constitutive Signaling by Aberrant PI3K in Cancer	15/1829	75/10654	0.300209	0.76998	0.698649	PIK3AP1/VAV1/IRS1/RAC2/PDGFB/FGFR3/PDGFRA/KIT/GAB1/NRG2/HBEGF/FGFR4/FYN/PDGFA/FGFR1	15
R-HSA-446203	Asparagine N-linked glycosylation	56/1829	304/10654	0.300605	0.76998	0.698649	FUCA1/B4GALT3/UAP1/NPL/ARF1/COG2/ACTR1A/BET1L/SLC35C1/SYVN1/NEU3/CTSC/DPAGT1/STT3A/ST3GAL4/ARF3/COPZ1/OS9/TRIM13/MGAT2/TMED10/NUDT14/MAN2A2/PMM2/DYNC1LI2/ST3GAL2/MVD/TUBB3/ASGR2/ENGASE/TUBB4A/CALR/PREB/ST3GAL5/MGAT4A/MGAT5/DYNC1I2/B4GALT5/CTSZ/PMM1/EDEM1/ANKRD28/GORASP1/COL7A1/RFT1/ST3GAL6/ALG3/SRD5A3/MGAT4B/MGAT1/MAN1A1/YKT6/RNF139/ST3GAL1/NANS/ST6GALNAC4	56
R-HSA-381042	PERK regulates gene expression	7/1829	32/10654	0.304416	0.770997	0.699572	ATF3/HERPUD1/CCL2/EXOSC5/CEBPB/EXOSC7/EXOSC4	7
R-HSA-392518	Signal amplification	7/1829	32/10654	0.304416	0.770997	0.699572	GNG5/GNG4/GNB5/GNG7/GNA15/TBXA2R/GNAI1	7
R-HSA-456926	Thrombin signalling through proteinase activated receptors (PARs)	7/1829	32/10654	0.304416	0.770997	0.699572	GNG5/GNG4/GNB5/MAPK3/ARRB2/GNG7/GNA15	7
R-HSA-5626467	RHO GTPases activate IQGAPs	7/1829	32/10654	0.304416	0.770997	0.699572	IQGAP3/CALM2/CALM1/TUBB3/TUBB4A/CALM3/IQGAP2	7
R-HSA-73863	RNA Polymerase I Transcription Termination	7/1829	32/10654	0.304416	0.770997	0.699572	MNAT1/POLR2E/ERCC2/POLR1B/POLR1C/TBP/TWISTNB	7
R-HSA-917729	Endosomal Sorting Complex Required For Transport (ESCRT)	7/1829	32/10654	0.304416	0.770997	0.699572	VPS37B/VPS4A/MVB12A/CHMP4B/VPS37D/CHMP5/MVB12B	7
R-HSA-9006931	Signaling by Nuclear Receptors	55/1829	299/10654	0.306726	0.775399	0.703567	DHRS3/GNG5/POU2F1/GNG4/AKR1C3/SCD/CTSD/NR1H3/CPT1A/CCND1/PGR/DLAT/RARG/NCOR2/FOS/CALM2/CALM1/AKT1/GNB5/TLE3/MAPK3/GPS2/SREBF1/DDX5/BCL2/POLR2E/GNG7/GTF2F1/PPP5C/CALM3/PRMT1/RDH13/XPO1/CYP26B1/DHRS9/ATF2/PLTP/MMP9/ZNF217/NRIP1/PPID/HBEGF/HSP90AB1/MYB/TBP/EEPD1/HSPB1/GNAI1/DLD/PTK2/ABCA1/RXRA/TBL1X/ELK1/STAG2	55
R-HSA-68827	CDT1 association with the CDC6:ORC:origin complex	12/1829	59/10654	0.307338	0.775498	0.703656	PSMA5/PSMD13/PSMA1/PSMD7/PSMB3/PSMD3/PSME3/PSMC5/PSMC4/PSMD1/PSMD2/PSMB1	12
R-HSA-112316	Neuronal System	75/1829	413/10654	0.312315	0.783497	0.710915	KCNAB2/KIF17/RPS6KA1/PTPRF/GNG5/KCNA3/HCN3/GLUL/SYT2/PPFIA4/KCNK1/GNG4/CAMK2G/KCNQ1/PPFIA1/NRGN/SLC6A12/SLC38A2/ALDH2/PRKAB1/SLITRK5/ADCY4/KCNK13/CALM2/CALM1/BEGAIN/APBA2/PLCB2/GNB5/RASGRF1/HOMER2/MAPK3/TUBB3/GIT1/CACNB1/GRIN3B/GNG7/PTPRS/TUBB4A/PRKACA/RAB3A/KCNN4/CALM3/GRIN2D/SLC17A7/KCNC3/SHANK1/KCNF1/ADCY3/CACNB4/EPB41L1/KCNG1/CAMK1/PRKAR2A/IL1RAP/NAAA/PDLIM5/CAMK2D/SLC1A3/CAMK4/KCNN2/FLOT1/KC…	75
R-HSA-69206	G1/S Transition	25/1829	131/10654	0.312777	0.783497	0.710915	RPA2/PSMA5/PSMD13/PSMA1/CCND1/CCNA1/MNAT1/AKT1/E2F4/PSMD7/PSMB3/PSMD3/PSME3/PSMC5/PSMC4/PPP2R1A/RRM2/PSMD1/PTK6/PSMD2/MCM3/FBXO5/PSMB1/CUL1/CCNE2	25
R-HSA-1368108	BMAL1:CLOCK,NPAS2 activates circadian gene expression	6/1829	27/10654	0.313399	0.783497	0.710915	DBP/HELZ2/SERPINE1/NAMPT/RXRA/TBL1X	6
R-HSA-3000170	Syndecan interactions	6/1829	27/10654	0.313399	0.783497	0.710915	SDC3/COL1A1/ITGA6/SDC4/ITGB5/SDC2	6
R-HSA-5621480	Dectin-2 family	6/1829	27/10654	0.313399	0.783497	0.710915	MUC1/FCER1G/PLCG2/FYN/LYN/SYK	6
R-HSA-5619115	Disorders of transmembrane transporters	33/1829	176/10654	0.316567	0.789736	0.716575	SLC35A3/PSMA5/AVPR1B/HK1/ERLIN1/PSMD13/PSMA1/SLC35C1/SLC11A2/OS9/SLC7A7/NUP93/PSMD7/PSMB3/PSMD3/PSME3/PSMC5/PSMC4/ABCB6/PSMD1/DERL3/NUP210/PSMD2/SLC1A3/SLC26A2/PSMB1/POM121/ABCB4/ERLIN2/SLC20A2/ABCA1/SLC34A3/AVPR2	33
R-HSA-5620924	Intraflagellar transport	11/1829	54/10654	0.31706	0.789736	0.716575	KIF17/DYNC2H1/IFT81/IFT88/TUBB3/TUBB4A/KIF3C/TTC30A/IFT80/WDR19/WDR60	11
R-HSA-202424	Downstream TCR signaling	19/1829	98/10654	0.317814	0.790162	0.716962	PSMA5/PSMD13/PSMA1/UBE2N/NFKBIA/PSMD7/PSMB3/PSMD3/PSME3/PSMC5/PSMC4/PSMD1/PSMD2/HLA-DRA/TAB2/PSMB1/CARD11/CUL1/RIPK2	19
R-HSA-3296482	Defects in vitamin and cofactor metabolism	5/1829	22/10654	0.322672	0.796124	0.722372	MMACHC/PC/BTD/PCCB/MCCC2	5
R-HSA-389357	CD28 dependent PI3K/Akt signaling	5/1829	22/10654	0.322672	0.796124	0.722372	MTOR/AKT1/PRR5/FYN/MAPKAP1	5
R-HSA-392170	ADP signalling through P2Y purinoceptor 12	5/1829	22/10654	0.322672	0.796124	0.722372	GNG5/GNG4/GNB5/GNG7/GNAI1	5
R-HSA-5365859	RA biosynthesis pathway	5/1829	22/10654	0.322672	0.796124	0.722372	DHRS3/AKR1C3/RDH13/CYP26B1/DHRS9	5
R-HSA-2129379	Molecules associated with elastic fibres	8/1829	38/10654	0.32315	0.796124	0.722372	EFEMP2/LTBP2/MFAP4/EMILIN2/EMILIN1/BMP2/FBLN1/ITGB5	8
R-HSA-5668914	Diseases of metabolism	20/1829	104/10654	0.325373	0.800146	0.726021	MMACHC/PC/GNS/CYP19A1/NAGLU/CYP1B1/CYP26B1/IDH1/AHCY/GGT1/CSF2RB/BTD/GBE1/PCCB/GYG1/IDUA/MCCC2/TPMT/TBXAS1/OPLAH	20
R-HSA-180292	GAB1 signalosome	4/1829	17/10654	0.331966	0.807565	0.732753	PXN/GAB1/HBEGF/PAG1	4
R-HSA-264642	Acetylcholine Neurotransmitter Release Cycle	4/1829	17/10654	0.331966	0.807565	0.732753	PPFIA4/PPFIA1/RAB3A/STX1A	4
R-HSA-3781860	Diseases associated with N-glycosylation of proteins	4/1829	17/10654	0.331966	0.807565	0.732753	DPAGT1/MGAT2/RFT1/ALG3	4
R-HSA-432142	Platelet sensitization by LDL	4/1829	17/10654	0.331966	0.807565	0.732753	FGR/LRP8/PTPN6/PPP2R1A	4
R-HSA-435354	Zinc transporters	4/1829	17/10654	0.331966	0.807565	0.732753	SLC30A1/SLC39A10/SLC39A8/SLC39A7	4
R-HSA-9018677	Biosynthesis of DHA-derived SPMs	4/1829	17/10654	0.331966	0.807565	0.732753	ALOX5/LTA4H/LTC4S/EPHX2	4
R-HSA-1296071	Potassium Channels	19/1829	99/10654	0.334813	0.809171	0.734209	KCNAB2/GNG5/KCNA3/HCN3/KCNK1/GNG4/KCNQ1/KCNK13/GNG7/KCNN4/KCNC3/KCNF1/KCNG1/KCNN2/KCNQ5/KCNH2/KCNQ3/GABBR2/KCND1	19
R-HSA-8852276	The role of GTSE1 in G2/M progression after G2 checkpoint	15/1829	77/10654	0.33868	0.809171	0.734209	PSMA5/PSMD13/PSMA1/PSMD7/TUBB3/PSMB3/PSMD3/PSME3/PSMC5/TUBB4A/PSMC4/PSMD1/PSMD2/HSP90AB1/PSMB1	15
R-HSA-451927	Interleukin-2 family signaling	9/1829	44/10654	0.338708	0.809171	0.734209	PTPN6/LGALS9/STAT5B/STAT5A/STAT1/STAT4/CSF2RB/SYK/IL2RG	9
R-HSA-1638091	Heparan sulfate/heparin (HS-GAG) metabolism	11/1829	55/10654	0.3401	0.809171	0.734209	HSPG2/SDC3/CSPG4/XYLT1/NAGLU/GPC1/SDC4/IDUA/NDST1/SDC2/EXT1	11
R-HSA-196108	Pregnenolone biosynthesis	3/1829	12/10654	0.340389	0.809171	0.734209	STARD4/AKR1B1/STAR	3
R-HSA-2160916	Hyaluronan uptake and degradation	3/1829	12/10654	0.340389	0.809171	0.734209	SLC9A1/CD44/HYAL3	3
R-HSA-2197563	NOTCH2 intracellular domain regulates transcription	3/1829	12/10654	0.340389	0.809171	0.734209	FCER2/RBPJ/MAML1	3
R-HSA-3371511	HSF1 activation	3/1829	12/10654	0.340389	0.809171	0.734209	RPA2/HSP90AB1/HDAC6	3
R-HSA-71384	Ethanol oxidation	3/1829	12/10654	0.340389	0.809171	0.734209	ALDH2/ACSS1/ACSS2	3
R-HSA-879518	Transport of organic anions	3/1829	12/10654	0.340389	0.809171	0.734209	SLCO3A1/SLCO4C1/SLC16A2	3
R-HSA-8963693	Aspartate and asparagine metabolism	3/1829	12/10654	0.340389	0.809171	0.734209	GOT1/GOT2/SLC25A12	3
R-HSA-9013973	TICAM1-dependent activation of IRF3/IRF7	3/1829	12/10654	0.340389	0.809171	0.734209	IKBKE/IRF7/TRAF3	3
R-HSA-933543	NF-kB activation through FADD/RIP-1 pathway mediated by caspase-8 and -10	3/1829	12/10654	0.340389	0.809171	0.734209	RNF135/TRIM25/IFIH1	3
R-HSA-389957	Prefoldin mediated transfer of substrate to CCT/TriC	6/1829	28/10654	0.346221	0.820156	0.744178	CCT3/TUBB3/TUBB4A/CCT7/PFDN1/CCT6A	6
R-HSA-400042	Adrenaline,noradrenaline inhibits insulin secretion	6/1829	28/10654	0.346221	0.820156	0.744178	GNG5/GNG4/ADRA2A/GNB5/GNG7/GNAI1	6
R-HSA-69017	CDK-mediated phosphorylation and removal of Cdc6	14/1829	72/10654	0.349529	0.824768	0.748362	PSMA5/PSMD13/PSMA1/CCNA1/PSMD7/PSMB3/PSMD3/PSME3/PSMC5/PSMC4/PSMD1/PSMD2/PSMB1/CCNE2	14
R-HSA-110313	Translesion synthesis by Y family DNA polymerases bypasses lesions on DNA template	8/1829	39/10654	0.350922	0.824768	0.748362	ISG15/MAD2L2/RPA2/USP10/TRIM25/POLI/POLD1/RCHY1	8
R-HSA-977444	GABA B receptor activation	8/1829	39/10654	0.350922	0.824768	0.748362	GNG5/GNG4/ADCY4/GNG7/ADCY3/ADCY1/GNAI1/GABBR2	8
R-HSA-991365	Activation of GABAB receptors	8/1829	39/10654	0.350922	0.824768	0.748362	GNG5/GNG4/ADCY4/GNG7/ADCY3/ADCY1/GNAI1/GABBR2	8
R-HSA-8943724	Regulation of PTEN gene transcription	12/1829	61/10654	0.351211	0.824768	0.748362	MTOR/PHC2/RRAGC/BMI1/RCOR1/MAPK3/CBX2/ATF2/SNAI1/CBX6/PPARG/RRAGD	12
R-HSA-373752	Netrin-1 signaling	10/1829	50/10654	0.351947	0.825065	0.748632	SLIT1/NEO1/PITPNA/PLCG1/MAPK11/ROBO1/MAPK13/FYN/EZR/PTK2	10
R-HSA-8957322	Metabolism of steroids	28/1829	151/10654	0.358275	0.837083	0.759536	FDPS/HSD11B1/ARV1/IDI2/IDI1/AKR1C2/AKR1C1/AKR1C3/SCD/SLC27A2/CYP19A1/HSD3B7/MVD/SREBF1/HELZ2/LSS/SRD5A3/MSMO1/HMGCS1/HMGCR/STARD4/ACAT2/AKR1B1/FDFT1/STAR/SQLE/RXRA/TBL1X	28
R-HSA-422356	Regulation of insulin secretion	15/1829	78/10654	0.358309	0.837083	0.759536	GNG5/GNG4/ADRA2A/ITPR2/PLCB2/GNB5/GNG7/GNA15/PRKACA/ITPR1/PRKAR2A/MARCKS/STX1A/GNAI1/CD36	15
R-HSA-450321	JNK (c-Jun kinases) phosphorylation and activation mediated by activated human TAK1	5/1829	23/10654	0.359465	0.83834	0.760677	UBE2N/NOD2/TAB2/RIPK2/IRAK1	5
R-HSA-6807070	PTEN Regulation	26/1829	140/10654	0.362443	0.843832	0.76566	MTOR/PHC2/RRAGC/PSMA5/BMI1/PSMD13/PSMA1/RCOR1/AKT1/MAPK3/PSMD7/PSMB3/PSMD3/PSME3/PSMC5/CBX2/PSMC4/ATF2/PSMD1/SNAI1/CBX6/PPARG/PSMD2/TRIM27/RRAGD/PSMB1	26
R-HSA-6794361	Neurexins and neuroligins	11/1829	56/10654	0.363429	0.844677	0.766427	SYT2/BEGAIN/APBA2/HOMER2/GRIN2D/SHANK1/EPB41L1/PDLIM5/DBNL/STX1A/NLGN4Y	11
R-HSA-170834	Signaling by TGF-beta Receptor Complex	14/1829	73/10654	0.370029	0.856669	0.777308	BAMBI/CBL/NCOR2/SMAD3/FURIN/E2F4/MTMR4/TGIF1/SMAD7/UBE2M/XPO1/FKBP1A/SERPINE1/TGFBR1	14
R-HSA-181429	Serotonin Neurotransmitter Release Cycle	4/1829	18/10654	0.374279	0.856669	0.777308	PPFIA4/PPFIA1/RAB3A/STX1A	4
R-HSA-181430	Norepinephrine Neurotransmitter Release Cycle	4/1829	18/10654	0.374279	0.856669	0.777308	PPFIA4/PPFIA1/RAB3A/STX1A	4
R-HSA-1912420	Pre-NOTCH Processing in Golgi	4/1829	18/10654	0.374279	0.856669	0.777308	ST3GAL4/FURIN/ST3GAL6/LFNG	4
R-HSA-446353	Cell-extracellular matrix interactions	4/1829	18/10654	0.374279	0.856669	0.777308	RSU1/PXN/VASP/TESK1	4
R-HSA-5635838	Activation of SMO	4/1829	18/10654	0.374279	0.856669	0.777308	ARRB2/EVC/IQCE/PTCH1	4
R-HSA-6804114	TP53 Regulates Transcription of Genes Involved in G2 Cell Cycle Arrest	4/1829	18/10654	0.374279	0.856669	0.777308	GADD45A/E2F4/PRMT1/CDC25C	4
R-HSA-881907	Gastrin-CREB signalling pathway via PKC and MAPK	4/1829	18/10654	0.374279	0.856669	0.777308	RPS6KA1/MAPK3/HBEGF/RPS6KA3	4
R-HSA-8964315	G beta:gamma signalling through BTK	4/1829	18/10654	0.374279	0.856669	0.777308	GNG5/GNG4/GNB5/GNG7	4
R-HSA-445355	Smooth Muscle Contraction	8/1829	40/10654	0.378963	0.862387	0.782496	MYL6/PXN/CALM2/CALM1/MYL12A/CALM3/ITGB5/TPM2	8
R-HSA-5675221	Negative regulation of MAPK pathway	8/1829	40/10654	0.378963	0.862387	0.782496	DUSP10/MARK3/MAPK3/PPP5C/PPP2R1A/DUSP7/DUSP4/ARAF	8
R-HSA-6783310	Fanconi Anemia Pathway	8/1829	40/10654	0.378963	0.862387	0.782496	RPA2/USP1/EME2/FANCA/FANCL/WDR48/ATR/FANCE	8
R-HSA-9619483	Activation of AMPK downstream of NMDARs	6/1829	29/10654	0.379323	0.862387	0.782496	PRKAB1/CALM2/CALM1/TUBB3/TUBB4A/CALM3	6
R-HSA-68867	Assembly of the pre-replicative complex	13/1829	68/10654	0.382562	0.868295	0.787856	PSMA5/PSMD13/PSMA1/PSMD7/PSMB3/PSMD3/PSME3/PSMC5/PSMC4/PSMD1/PSMD2/MCM3/PSMB1	13
R-HSA-112308	Presynaptic depolarization and calcium channel opening	3/1829	13/10654	0.391196	0.879055	0.79762	CACNB1/CACNB4/CACFD1	3
R-HSA-1362409	Mitochondrial iron-sulfur cluster biogenesis	3/1829	13/10654	0.391196	0.879055	0.79762	GLRX5/FXN/ISCA1	3
R-HSA-3270619	IRF3-mediated induction of type I IFN	3/1829	13/10654	0.391196	0.879055	0.79762	DTX4/NLRC3/TREX1	3
R-HSA-74217	Purine salvage	3/1829	13/10654	0.391196	0.879055	0.79762	AMPD2/PNP/ADAL	3
R-HSA-879415	Advanced glycosylation endproduct receptor signaling	3/1829	13/10654	0.391196	0.879055	0.79762	HMGB1/LGALS3/MAPK3	3
R-HSA-8847993	ERBB2 Activates PTK6 Signaling	3/1829	13/10654	0.391196	0.879055	0.79762	PTK6/NRG2/HBEGF	3
R-HSA-432720	Lysosome Vesicle Biogenesis	7/1829	35/10654	0.394683	0.883341	0.801509	ARF1/GNS/DNASE2/VAMP8/CTSZ/AP1B1/AP1S2	7
R-HSA-532668	N-glycan trimming in the ER and Calnexin/Calreticulin cycle	7/1829	35/10654	0.394683	0.883341	0.801509	SYVN1/OS9/TRIM13/ENGASE/CALR/EDEM1/RNF139	7
R-HSA-174084	Autodegradation of Cdh1 by Cdh1:APC/C	12/1829	63/10654	0.396033	0.883341	0.801509	PSMA5/PSMD13/PSMA1/PSMD7/PSMB3/PSMD3/PSME3/PSMC5/PSMC4/PSMD1/PSMD2/PSMB1	12
R-HSA-8940973	RUNX2 regulates osteoblast differentiation	5/1829	24/10654	0.396362	0.883341	0.801509	MAPK3/COL1A1/YES1/ABL1/HDAC6	5
R-HSA-977068	Termination of O-glycan biosynthesis	5/1829	24/10654	0.396362	0.883341	0.801509	MUC1/ST3GAL4/ST3GAL2/ST3GAL1/ST6GALNAC4	5
R-HSA-1169410	Antiviral mechanism by IFN-stimulated genes	15/1829	80/10654	0.398084	0.884268	0.80235	ISG15/EIF4G3/UBE2N/OAS3/OAS2/MAPK3/NUP93/TRIM25/EIF2AK2/STAT1/PLCG1/MX1/NUP210/FLNB/POM121	15
R-HSA-176408	Regulation of APC/C activators between G1/S and early anaphase	15/1829	80/10654	0.398084	0.884268	0.80235	PSMA5/PSMD13/PSMA1/CCNA1/PSMD7/PSMB3/PSMD3/PSME3/PSMC5/PSMC4/PSMD1/PSMD2/FBXO5/PSMB1/CUL1	15
R-HSA-174143	APC/C-mediated degradation of cell cycle proteins	16/1829	86/10654	0.404856	0.896158	0.813138	CDC14A/PSMA5/PSMD13/PSMA1/CCNA1/PSMD7/PSMB3/PSMD3/PSME3/PSMC5/PSMC4/PSMD1/PSMD2/FBXO5/PSMB1/CUL1	16
R-HSA-453276	Regulation of mitotic cell cycle	16/1829	86/10654	0.404856	0.896158	0.813138	CDC14A/PSMA5/PSMD13/PSMA1/CCNA1/PSMD7/PSMB3/PSMD3/PSME3/PSMC5/PSMC4/PSMD1/PSMD2/FBXO5/PSMB1/CUL1	16
R-HSA-5633007	Regulation of TP53 Activity	29/1829	160/10654	0.40542	0.896158	0.813138	MTOR/RPA2/PLK3/HIPK1/SMYD2/EXO1/USP2/RHNO1/PRKAB1/CCNA1/POU4F1/PRMT5/AKT1/BANP/CDK5R1/MAP2K6/PPP2R1A/ING5/PRR5/MAPK11/ATR/POU4F2/ING2/TAF9/BRPF3/SGK1/TBP/TP53INP1/MAPKAP1	29
R-HSA-917937	Iron uptake and transport	11/1829	58/10654	0.410598	0.906125	0.822182	ATP6V0B/SLC11A2/HMOX2/ATP6V0D1/FTL/STEAP3/CYBRD1/TF/TFR2/CUL1/ATP6V0E2	11
R-HSA-157118	Signaling by NOTCH	42/1829	235/10654	0.412989	0.90992	0.825625	HEYL/PSMA5/APH1A/PSEN2/PSMD13/PSMA1/DTX4/CCND1/ST3GAL4/NCOR2/AKT1/ADAM10/SMAD3/TLE3/FURIN/PSMD7/ARRB2/PSMB3/PSMD3/PSME3/PSMC5/SIRT6/FCER2/PSMC4/STAT1/PSMD1/JAG1/ITCH/ST3GAL6/PSMD2/RBPJ/WWC1/NEURL1B/MAML1/DLL1/PSMB1/LFNG/CUL1/TLE4/TLE1/TBL1X/HDAC6	42
R-HSA-197264	Nicotinamide salvaging	4/1829	19/10654	0.416342	0.912854	0.828288	PARP9/PARP14/NAMPT/PARP10	4
R-HSA-422085	Synthesis, secretion, and deacylation of Ghrelin	4/1829	19/10654	0.416342	0.912854	0.828288	SPCS2/SEC11A/GHRL/KLF4	4
R-HSA-9018678	Biosynthesis of specialized proresolving mediators (SPMs)	4/1829	19/10654	0.416342	0.912854	0.828288	ALOX5/LTA4H/LTC4S/EPHX2	4
R-HSA-73762	RNA Polymerase I Transcription Initiation	9/1829	47/10654	0.41753	0.91398	0.82931	ERCC6/MNAT1/RRN3/POLR2E/ERCC2/POLR1B/POLR1C/TBP/TWISTNB	9
R-HSA-913709	O-linked glycosylation of mucins	12/1829	64/10654	0.418607	0.91486	0.830108	MUC1/GALNT2/ST3GAL4/ST3GAL2/B3GNTL1/B3GNT8/B3GNT7/B4GALT5/B3GNT5/ST3GAL1/GCNT1/ST6GALNAC4	12
R-HSA-1266695	Interleukin-7 signaling	7/1829	36/10654	0.425011	0.927358	0.841448	SOCS2/SOCS1/STAT5B/STAT5A/IRS1/IL7R/IL2RG	7
R-HSA-1660499	Synthesis of PIPs at the plasma membrane	10/1829	53/10654	0.426458	0.92902	0.842956	PIP5K1A/PIK3C2B/ARF1/PI4K2A/PIP5K1C/INPP4A/INPP4B/PLEKHA2/PIP5K1B/MTM1	10
R-HSA-389960	Formation of tubulin folding intermediates by CCT/TriC	5/1829	25/10654	0.433042	0.933171	0.846723	CCT3/TUBB3/TUBB4A/CCT7/CCT6A	5
R-HSA-392451	G beta:gamma signalling through PI3Kgamma	5/1829	25/10654	0.433042	0.933171	0.846723	GNG5/GNG4/AKT1/GNB5/GNG7	5
R-HSA-418592	ADP signalling through P2Y purinoceptor 1	5/1829	25/10654	0.433042	0.933171	0.846723	GNG5/GNG4/GNB5/GNG7/GNA15	5
R-HSA-5674400	Constitutive Signaling by AKT1 E17K in Cancer	5/1829	25/10654	0.433042	0.933171	0.846723	MTOR/AKT1/PRR5/MAPKAP1/FOXO4	5
R-HSA-69273	Cyclin A/B1/B2 associated events during G2/M transition	5/1829	25/10654	0.433042	0.933171	0.846723	CCNA1/MNAT1/PPP2R1A/XPO1/CDC25C	5
R-HSA-9013508	NOTCH3 Intracellular Domain Regulates Transcription	5/1829	25/10654	0.433042	0.933171	0.846723	HEYL/STAT1/RBPJ/WWC1/MAML1	5
R-HSA-3000171	Non-integrin membrane-ECM interactions	11/1829	59/10654	0.434262	0.933171	0.846723	HSPG2/SDC3/LAMC1/LAMB3/COL1A1/ITGA6/SDC4/PDGFB/ITGB5/PDGFA/SDC2	11
R-HSA-2173782	Binding and Uptake of Ligands by Scavenger Receptors	8/1829	42/10654	0.43525	0.933171	0.846723	LRP1/HSP90B1/SCARB1/COL1A1/CALR/FTL/MARCO/CD36	8
R-HSA-381676	Glucagon-like Peptide-1 (GLP1) regulates insulin secretion	8/1829	42/10654	0.43525	0.933171	0.846723	GNG5/GNG4/ITPR2/GNB5/GNG7/PRKACA/ITPR1/PRKAR2A	8
R-HSA-6814122	Cooperation of PDCL (PhLP1) and TRiC/CCT in G-protein beta folding	8/1829	42/10654	0.43525	0.933171	0.846723	GNG5/CCT3/GNG4/GNB5/GNG7/CCT7/CCT6A/GNAI1	8
R-HSA-156581	Methylation	3/1829	14/10654	0.440936	0.933545	0.847062	TRMT112/AHCY/TPMT	3
R-HSA-162658	Golgi Cisternae Pericentriolar Stack Reorganization	3/1829	14/10654	0.440936	0.933545	0.847062	BLZF1/MAPK3/GORASP1	3
R-HSA-200425	Import of palmitoyl-CoA into the mitochondrial matrix	3/1829	14/10654	0.440936	0.933545	0.847062	CPT1A/SLC25A20/RXRA	3
R-HSA-2024101	CS/DS degradation	3/1829	14/10654	0.440936	0.933545	0.847062	CSPG4/HYAL3/IDUA	3
R-HSA-5358565	Mismatch repair (MMR) directed by MSH2:MSH6 (MutSalpha)	3/1829	14/10654	0.440936	0.933545	0.847062	RPA2/EXO1/POLD1	3
R-HSA-5358606	Mismatch repair (MMR) directed by MSH2:MSH3 (MutSbeta)	3/1829	14/10654	0.440936	0.933545	0.847062	RPA2/EXO1/POLD1	3
R-HSA-71240	Tryptophan catabolism	3/1829	14/10654	0.440936	0.933545	0.847062	KMO/SLC7A5/HAAO	3
R-HSA-8983432	Interleukin-15 signaling	3/1829	14/10654	0.440936	0.933545	0.847062	STAT5B/STAT5A/IL2RG	3
R-HSA-917977	Transferrin endocytosis and recycling	6/1829	31/10654	0.445398	0.941521	0.854299	ATP6V0B/ATP6V0D1/STEAP3/TF/TFR2/ATP6V0E2	6
R-HSA-8856828	Clathrin-mediated endocytosis	26/1829	146/10654	0.452388	0.954805	0.866353	FNBP1L/DNM3/SYT2/CTTN/CBL/ARF6/ARRB2/DVL2/PIP5K1C/TRIP10/FCHO1/EPN1/VAMP8/BIN1/ITSN1/PACSIN2/TF/GAK/SCARB2/IL7R/SNX18/HBEGF/ADRB2/FNBP1/SH3KBP1/AVPR2	26
R-HSA-162909	Host Interactions of HIV factors	23/1829	129/10654	0.456929	0.957117	0.86845	PSMA5/ARF1/PSMD13/PSMA1/NUP93/PSMD7/PSMB3/PSMD3/PSME3/PSMC5/PSMC4/XPO1/PSMD1/HCK/AP1B1/NUP210/PSMD2/SLC25A4/FYN/PSMB1/POM121/AP1S2/SLC25A5	23
R-HSA-2028269	Signaling by Hippo	4/1829	20/10654	0.457721	0.957117	0.86845	DVL2/STK4/WWC1/TJP2	4
R-HSA-3232118	SUMOylation of transcription factors	4/1829	20/10654	0.457721	0.957117	0.86845	PIAS3/TFAP2C/MITF/FOXL2	4
R-HSA-5213460	RIPK1-mediated regulated necrosis	4/1829	20/10654	0.457721	0.957117	0.86845	RIPK3/CFLAR/TNFSF10/TNFRSF10B	4
R-HSA-5218859	Regulated Necrosis	4/1829	20/10654	0.457721	0.957117	0.86845	RIPK3/CFLAR/TNFSF10/TNFRSF10B	4
R-HSA-8964616	G beta:gamma signalling through CDC42	4/1829	20/10654	0.457721	0.957117	0.86845	GNG5/GNG4/GNB5/GNG7	4
R-HSA-3371556	Cellular response to heat stress	16/1829	89/10654	0.463018	0.966651	0.877101	MTOR/RPA2/MAPKAPK2/CAMK2G/MAPK3/NUP93/HSPA13/NUP210/ATR/CAMK2D/HSPA4L/HSPA9/HSP90AB1/POM121/BAG1/HDAC6	16
R-HSA-1234176	Oxygen-dependent proline hydroxylation of Hypoxia-inducible Factor Alpha	12/1829	66/10654	0.463707	0.966651	0.877101	PSMA5/PSMD13/PSMA1/PSMD7/PSMB3/PSMD3/PSME3/PSMC5/PSMC4/PSMD1/PSMD2/PSMB1	12
R-HSA-1632852	Macroautophagy	17/1829	95/10654	0.467451	0.971668	0.881654	MTOR/MFN2/PINK1/RRAGC/AMBRA1/UVRAG/PRKAB1/ATG4D/TOMM40/ATG9A/CHMP4B/MAP1LC3A/TOMM22/VDAC1/RRAGD/ATG5/RB1CC1	17
R-HSA-1169408	ISG15 antiviral mechanism	13/1829	72/10654	0.468982	0.971668	0.881654	ISG15/EIF4G3/UBE2N/MAPK3/NUP93/TRIM25/EIF2AK2/STAT1/PLCG1/MX1/NUP210/FLNB/POM121	13
R-HSA-174184	Cdc20:Phospho-APC/C mediated degradation of Cyclin A	13/1829	72/10654	0.468982	0.971668	0.881654	PSMA5/PSMD13/PSMA1/CCNA1/PSMD7/PSMB3/PSMD3/PSME3/PSMC5/PSMC4/PSMD1/PSMD2/PSMB1	13
R-HSA-199992	trans-Golgi Network Vesicle Budding	13/1829	72/10654	0.468982	0.971668	0.881654	SORT1/ARF1/GNS/BLOC1S6/DNASE2/FTL/VAMP8/CTSZ/AP1B1/GAK/CLINT1/TPD52/AP1S2	13
R-HSA-72306	tRNA processing	19/1829	107/10654	0.475474	0.983614	0.892493	ZBTB8OS/TYW3/TRDMT1/TRMT112/PUS1/OSGEP/NUP93/CTU2/ELAC2/TRMT1/DDX1/WDR4/NUP210/RPP14/NSUN2/ADAT2/POM121/POP1/URM1	19
R-HSA-389958	Cooperation of Prefoldin and TriC/CCT in actin and tubulin folding	6/1829	32/10654	0.477933	0.984193	0.893018	CCT3/TUBB3/TUBB4A/CCT7/PFDN1/CCT6A	6
R-HSA-397795	G-protein beta:gamma signalling	6/1829	32/10654	0.477933	0.984193	0.893018	GNG5/GNG4/AKT1/PLCB2/GNB5/GNG7	6
R-HSA-5656169	Termination of translesion DNA synthesis	6/1829	32/10654	0.477933	0.984193	0.893018	ISG15/RPA2/USP10/TRIM25/POLI/POLD1	6
R-HSA-69052	Switching of origins to a post-replicative state	16/1829	90/10654	0.482322	0.986859	0.895437	PSMA5/PSMD13/PSMA1/CCNA1/PSMD7/PSMB3/PSMD3/PSME3/PSMC5/PSMC4/PSMD1/PSMD2/MCM3/PSMB1/CUL1/CCNE2	16
R-HSA-373760	L1CAM interactions	21/1829	119/10654	0.482592	0.986859	0.895437	LYPLA2/RPS6KA1/DNM3/LAMC1/RPS6KA4/NCAM1/ITGA5/RPS6KA5/MAPK3/TUBB3/TUBB4A/ITGA9/ALCAM/EZR/NRCAM/DPYSL2/FGFR1/SDCBP/KCNQ3/RPS6KA3/MSN	21
R-HSA-5689896	Ovarian tumor domain proteases	7/1829	38/10654	0.484968	0.986859	0.895437	TRAF3/NOD2/RNF135/TRIM25/IFIH1/TNFAIP3/RIPK2	7
R-HSA-174154	APC/C:Cdc20 mediated degradation of Securin	12/1829	67/10654	0.486091	0.986859	0.895437	PSMA5/PSMD13/PSMA1/PSMD7/PSMB3/PSMD3/PSME3/PSMC5/PSMC4/PSMD1/PSMD2/PSMB1	12
R-HSA-111447	Activation of BAD and translocation to mitochondria	3/1829	15/10654	0.489008	0.986859	0.895437	AKT1/BCL2/BID	3
R-HSA-2214320	Anchoring fibril formation	3/1829	15/10654	0.489008	0.986859	0.895437	LAMB3/COL1A1/COL7A1	3
R-HSA-372708	p130Cas linkage to MAPK signaling for integrins	3/1829	15/10654	0.489008	0.986859	0.895437	APBB1IP/BCAR1/PTK2	3
R-HSA-5358508	Mismatch Repair	3/1829	15/10654	0.489008	0.986859	0.895437	RPA2/EXO1/POLD1	3
R-HSA-5637810	Constitutive Signaling by EGFRvIII	3/1829	15/10654	0.489008	0.986859	0.895437	CBL/PLCG1/GAB1	3
R-HSA-5637812	Signaling by EGFRvIII in Cancer	3/1829	15/10654	0.489008	0.986859	0.895437	CBL/PLCG1/GAB1	3
R-HSA-6785631	ERBB2 Regulates Cell Motility	3/1829	15/10654	0.489008	0.986859	0.895437	NRG2/HBEGF/DIAPH1	3
R-HSA-8866910	TFAP2 (AP-2) family regulates transcription of growth factors and their receptors	3/1829	15/10654	0.489008	0.986859	0.895437	TFAP2C/KIT/VEGFA	3
R-HSA-975110	TRAF6 mediated IRF7 activation in TLR7/8 or 9 signaling	3/1829	15/10654	0.489008	0.986859	0.895437	IRF7/UBE2N/IRAK1	3
R-HSA-5689603	UCH proteinases	18/1829	102/10654	0.489728	0.986859	0.895437	PSMA5/PSMD13/PSMA1/PSMD7/PSMB3/PSMD3/PSME3/PSMC5/SMAD7/PSMC4/ASXL2/PSMD1/ADRM1/RUVBL1/PSMD2/PSMB1/FOXK1/TGFBR1	18
R-HSA-179419	APC:Cdc20 mediated degradation of cell cycle proteins prior to satisfation of the cell cycle checkpoint	13/1829	73/10654	0.490422	0.986859	0.895437	PSMA5/PSMD13/PSMA1/CCNA1/PSMD7/PSMB3/PSMD3/PSME3/PSMC5/PSMC4/PSMD1/PSMD2/PSMB1	13
R-HSA-8948216	Collagen chain trimerization	8/1829	44/10654	0.49088	0.986859	0.895437	COL8A2/COL24A1/COL1A1/COL18A1/COL6A1/COL7A1/COL12A1/COL15A1	8
R-HSA-8957275	Post-translational protein phosphorylation	19/1829	108/10654	0.4931	0.989853	0.898154	MXRA8/QSOX1/LAMC1/RCN1/HSP90B1/GAS6/ADAM10/MFGE8/IGFBP4/P4HB/FSTL3/ANO8/MGAT4A/LGALS1/TF/IGFBP7/FAM20C/SDC2/GOLM1	19
R-HSA-5654736	Signaling by FGFR1	9/1829	50/10654	0.495996	0.990975	0.899171	FLRT1/CBL/MAPK3/PPP2R1A/SPRED2/PLCG1/FGFRL1/GAB1/FGFR1	9
R-HSA-1606322	ZBP1(DAI) mediated induction of type I IFNs	4/1829	21/10654	0.498047	0.990975	0.899171	NFKB2/DTX4/RIPK3/NFKBIA	4
R-HSA-5620916	VxPx cargo-targeting to cilium	4/1829	21/10654	0.498047	0.990975	0.899171	EXOC1/PKD2/EXOC3/ASAP1	4
R-HSA-5621575	CD209 (DC-SIGN) signaling	4/1829	21/10654	0.498047	0.990975	0.899171	RPS6KA5/PRKACA/FYN/LYN	4
R-HSA-6807004	Negative regulation of MET activity	4/1829	21/10654	0.498047	0.990975	0.899171	CBL/PTPN2/LRIG1/SH3KBP1	4
R-HSA-8849932	Synaptic adhesion-like molecules	4/1829	21/10654	0.498047	0.990975	0.899171	PTPRF/PTPRS/GRIN2D/FLOT1	4
R-HSA-429914	Deadenylation-dependent mRNA decay	10/1829	56/10654	0.500517	0.992408	0.900472	TNKS1BP1/DCPS/PAN3/WDR61/NT5C3B/EXOSC5/CNOT11/EXOSC7/PABPC1/EXOSC4	10
R-HSA-432722	Golgi Associated Vesicle Biogenesis	10/1829	56/10654	0.500517	0.992408	0.900472	SORT1/ARF1/BLOC1S6/FTL/VAMP8/AP1B1/GAK/CLINT1/TPD52/AP1S2	10
R-HSA-114508	Effects of PIP2 hydrolysis	5/1829	27/10654	0.504627	0.992408	0.900472	ITPR2/PRKCH/PRKCE/ITPR1/DGKG	5
R-HSA-164952	The role of Nef in HIV-1 replication and disease pathogenesis	5/1829	27/10654	0.504627	0.992408	0.900472	ARF1/HCK/AP1B1/FYN/AP1S2	5
R-HSA-211976	Endogenous sterols	5/1829	27/10654	0.504627	0.992408	0.900472	CYP19A1/CYP1B1/CYP4V2/AHR/RXRA	5
R-HSA-354192	Integrin alphaIIb beta3 signaling	5/1829	27/10654	0.504627	0.992408	0.900472	APBB1IP/AKT1/BCAR1/PTK2/SYK	5
R-HSA-5357769	Caspase activation via extrinsic apoptotic signalling pathway	5/1829	27/10654	0.504627	0.992408	0.900472	CFLAR/TNFSF10/CD14/TNFRSF10B/LY96	5
R-HSA-9006921	Integrin signaling	5/1829	27/10654	0.504627	0.992408	0.900472	APBB1IP/AKT1/BCAR1/PTK2/SYK	5
R-HSA-112315	Transmission across Chemical Synapses	47/1829	272/10654	0.505898	0.993466	0.901432	KIF17/RPS6KA1/GNG5/GLUL/PPFIA4/GNG4/CAMK2G/PPFIA1/NRGN/SLC6A12/SLC38A2/ALDH2/PRKAB1/ADCY4/CALM2/CALM1/PLCB2/GNB5/RASGRF1/MAPK3/TUBB3/GIT1/CACNB1/GRIN3B/GNG7/TUBB4A/PRKACA/RAB3A/CALM3/GRIN2D/SLC17A7/ADCY3/CACNB4/EPB41L1/CAMK1/PRKAR2A/NAAA/CAMK2D/SLC1A3/CAMK4/ADCY1/STX1A/GNAI1/NCALD/GABBR2/CACFD1/RPS6KA3	47
R-HSA-2187338	Visual phototransduction	18/1829	103/10654	0.507756	0.995252	0.903052	DHRS3/HSPG2/SDC3/LRP8/AKR1C1/AKR1C3/LRP1/CALM2/CALM1/GNB5/NMT1/CALM3/DHRS9/GPC1/SDC4/CYP4V2/SDC2/LRP12	18
R-HSA-3906995	Diseases associated with O-glycosylation of proteins	12/1829	68/10654	0.508276	0.995252	0.903052	MUC1/ADAMTS4/ADAMTS14/POMT2/ADAMTS7/ADAMTS17/ADAMTS10/ADAMTS3/ADAMTS2/LFNG/THSD7A/CFP	12
R-HSA-202433	Generation of second messenger molecules	6/1829	33/10654	0.509875	0.995505	0.903282	EVL/LAT/VASP/PLCG1/LCP2/HLA-DRA	6
R-HSA-420092	Glucagon-type ligand receptors	6/1829	33/10654	0.509875	0.995505	0.903282	GNG5/GNG4/GNB5/GNG7/GIPR/VIPR1	6
R-HSA-76009	Platelet Aggregation (Plug Formation)	7/1829	39/10654	0.51429	0.99922	0.906653	APBB1IP/ADRA2A/AKT1/BCAR1/COL1A1/PTK2/SYK	7
R-HSA-8955332	Carboxyterminal post-translational modifications of tubulin	7/1829	39/10654	0.51429	0.99922	0.906653	TTLL7/TUBB3/TPGS2/TUBB4A/AGBL5/TTLL4/AGTPBP1	7
R-HSA-3899300	SUMOylation of transcription cofactors	8/1829	45/10654	0.518136	0.99922	0.906653	PHC2/PIAS3/BMI1/NCOR2/DDX5/CBX2/NRIP1/ING2	8
R-HSA-112310	Neurotransmitter release cycle	9/1829	51/10654	0.521566	0.99922	0.906653	PPFIA4/PPFIA1/SLC6A12/SLC38A2/RAB3A/SLC17A7/NAAA/SLC1A3/STX1A	9
R-HSA-5620920	Cargo trafficking to the periciliary membrane	9/1829	51/10654	0.521566	0.99922	0.906653	CCT3/ARL3/MKKS/LZTFL1/NPHP3/EXOC1/PKD2/EXOC3/ASAP1	9
R-HSA-9033241	Peroxisomal protein import	11/1829	63/10654	0.527541	0.99922	0.906653	TYSND1/IDE/CAT/SLC27A2/NUDT7/PIPOX/ACOX1/IDH1/GSTK1/EPHX2/CRAT	11
R-HSA-162906	HIV Infection	40/1829	233/10654	0.527669	0.99922	0.906653	PSMA5/ARF1/PSMD13/PSMA1/VPS37B/MNAT1/FURIN/NUP93/VPS4A/PSMD7/PSMB3/PSMD3/PSME3/NMT1/PSMC5/POLR2E/GTF2F1/MVB12A/ELL/PSMC4/ERCC2/XPO1/CXCR4/PSMD1/HCK/CHMP4B/AP1B1/NUP210/PSMD2/SLC25A4/TAF9/FYN/PSMB1/TBP/POM121/VPS37D/CHMP5/MVB12B/AP1S2/SLC25A5	40
R-HSA-174824	Plasma lipoprotein assembly, remodeling, and clearance	12/1829	69/10654	0.5302	0.99922	0.906653	SOAT1/NR1H3/SCARB1/FURIN/PCSK6/APOBR/LCAT/P4HB/NPC1/PRKACA/PLTP/ABCA1	12
R-HSA-176409	APC/C:Cdc20 mediated degradation of mitotic proteins	13/1829	75/10654	0.53269	0.99922	0.906653	PSMA5/PSMD13/PSMA1/CCNA1/PSMD7/PSMB3/PSMD3/PSME3/PSMC5/PSMC4/PSMD1/PSMD2/PSMB1	13
R-HSA-111367	SLBP independent Processing of Histone Pre-mRNAs	2/1829	10/10654	0.532874	0.99922	0.906653	LSM10/ZNF473	2
R-HSA-1250342	PI3K events in ERBB4 signaling	2/1829	10/10654	0.532874	0.99922	0.906653	NRG2/HBEGF	2
R-HSA-159740	Gamma-carboxylation of protein precursors	2/1829	10/10654	0.532874	0.99922	0.906653	GAS6/GGCX	2
R-HSA-159782	Removal of aminoterminal propeptides from gamma-carboxylated proteins	2/1829	10/10654	0.532874	0.99922	0.906653	GAS6/FURIN	2
R-HSA-168799	Neurotoxicity of clostridium toxins	2/1829	10/10654	0.532874	0.99922	0.906653	SYT2/STX1A	2
R-HSA-174437	Removal of the Flap Intermediate from the C-strand	2/1829	10/10654	0.532874	0.99922	0.906653	RPA2/POLD1	2
R-HSA-193697	p75NTR regulates axonogenesis	2/1829	10/10654	0.532874	0.99922	0.906653	RTN4/RTN4R	2
R-HSA-2151209	Activation of PPARGC1A (PGC-1alpha) by phosphorylation	2/1829	10/10654	0.532874	0.99922	0.906653	PRKAB1/MAPK11	2
R-HSA-381183	ATF6 (ATF6-alpha) activates chaperone genes	2/1829	10/10654	0.532874	0.99922	0.906653	HSP90B1/CALR	2
R-HSA-418890	Role of second messengers in netrin-1 signaling	2/1829	10/10654	0.532874	0.99922	0.906653	PITPNA/PLCG1	2
R-HSA-428542	Regulation of commissural axon pathfinding by SLIT and ROBO	2/1829	10/10654	0.532874	0.99922	0.906653	SLIT1/ROBO1	2
R-HSA-74182	Ketone body metabolism	2/1829	10/10654	0.532874	0.99922	0.906653	ACAT1/BDH1	2
R-HSA-8853334	Signaling by FGFR3 fusions in cancer	2/1829	10/10654	0.532874	0.99922	0.906653	FGFR3/GAB1	2
R-HSA-8875656	MET receptor recycling	2/1829	10/10654	0.532874	0.99922	0.906653	ARF6/GAB1	2
R-HSA-8964058	HDL remodeling	2/1829	10/10654	0.532874	0.99922	0.906653	LCAT/PLTP	2
R-HSA-1295596	Spry regulation of FGF signaling	3/1829	16/10654	0.534955	0.99922	0.906653	CBL/MAPK3/PPP2R1A	3
R-HSA-1834941	STING mediated induction of host immune responses	3/1829	16/10654	0.534955	0.99922	0.906653	DTX4/NLRC3/TREX1	3
R-HSA-193639	p75NTR signals via NF-kB	3/1829	16/10654	0.534955	0.99922	0.906653	NFKBIA/RIPK2/IRAK1	3
R-HSA-1963642	PI3K events in ERBB2 signaling	3/1829	16/10654	0.534955	0.99922	0.906653	GAB1/NRG2/HBEGF	3
R-HSA-210744	Regulation of gene expression in late stage (branching morphogenesis) pancreatic bud precursor cells	3/1829	16/10654	0.534955	0.99922	0.906653	NEUROG3/RBPJ/MAML1	3
R-HSA-418457	cGMP effects	3/1829	16/10654	0.534955	0.99922	0.906653	MRVI1/PDE1B/ITPR1	3
R-HSA-975163	IRAK2 mediated activation of TAK1 complex upon TLR7/8 or 9 stimulation	3/1829	16/10654	0.534955	0.99922	0.906653	CD14/TAB2/LY96	3
R-HSA-1250196	SHC1 events in ERBB2 signaling	4/1829	22/10654	0.537019	0.99922	0.906653	PRKCE/NRG2/HBEGF/PTPN12	4
R-HSA-1474228	Degradation of the extracellular matrix	24/1829	140/10654	0.538452	0.99922	0.906653	HSPG2/COL8A2/ADAMTS4/LAMC1/LAMB3/CAPN2/NID1/CTSD/CD44/MMP19/ADAM10/FURIN/MMP25/COL1A1/TIMP2/CAPN12/MMP9/COL18A1/COL6A1/SCUBE1/COL7A1/COL12A1/CTSB/COL15A1	24
R-HSA-1614635	Sulfur amino acid metabolism	5/1829	28/10654	0.539063	0.99922	0.906653	GOT1/GOT2/ADI1/AHCY/TXN2	5
R-HSA-202040	G-protein activation	5/1829	28/10654	0.539063	0.99922	0.906653	GNG5/GNG4/GNB5/GNG7/GNAI1	5
R-HSA-350054	Notch-HLH transcription pathway	5/1829	28/10654	0.539063	0.99922	0.906653	NCOR2/RBPJ/MAML1/TBL1X/HDAC6	5
R-HSA-75067	Processing of Capped Intronless Pre-mRNA	5/1829	28/10654	0.539063	0.99922	0.906653	LSM10/PCF11/CPSF2/ZNF473/FIP1L1	5
R-HSA-187687	Signalling to ERKs	6/1829	34/10654	0.541059	1	0.907361	MAPKAPK2/MAPK3/MAPK11/MAPK13/RALA/RALGDS	6
R-HSA-192105	Synthesis of bile acids and bile salts	6/1829	34/10654	0.541059	1	0.907361	AKR1C2/AKR1C1/AKR1C3/SLC27A2/HSD3B7/RXRA	6
R-HSA-165159	mTOR signalling	7/1829	40/10654	0.542996	1	0.907361	MTOR/RRAGC/PRKAB1/CAB39L/AKT1/RRAGD/EIF4EBP1	7
R-HSA-1660662	Glycosphingolipid metabolism	8/1829	46/10654	0.544871	1	0.907361	NEU3/ESYT1/B4GALNT1/ARSG/GM2A/ESYT2/GBA2/STS	8
R-HSA-1236394	Signaling by ERBB4	10/1829	58/10654	0.548445	1	0.907361	STMN1/APH1A/PSEN2/PGR/WWOX/STAT5A/ITCH/NRG2/HBEGF/TAB2	10
R-HSA-196849	Metabolism of water-soluble vitamins and cofactors	21/1829	123/10654	0.548774	1	0.907361	NADK/PANK4/MMACHC/FLAD1/NMNAT2/PC/SHMT2/ABCC1/SLC5A6/BTD/PARP9/PARP14/PCCB/NMNAT3/CD38/MCCC2/PANK3/NAMPT/PARP10/SLC52A2/NMRK1	21
R-HSA-1500931	Cell-Cell communication	22/1829	129/10654	0.550464	1	0.907361	LAMB3/RSU1/CD151/CADM1/PTPN6/PXN/CDH15/JUP/ACTN4/VASP/NCK2/ITGA6/SIRPB1/CD47/FYN/SDK1/SKAP2/CLDN12/CLDN23/PTK2/PLEC/TESK1	22
R-HSA-388841	Costimulation by the CD28 family	12/1829	70/10654	0.551804	1	0.907361	MTOR/PTPN6/AKT1/YES1/VAV1/PPP2R1A/PRR5/HLA-DRA/FYN/LYN/CD274/MAPKAP1	12
R-HSA-176814	Activation of APC/C and APC/C:Cdc20 mediated degradation of mitotic proteins	13/1829	76/10654	0.553412	1	0.907361	PSMA5/PSMD13/PSMA1/CCNA1/PSMD7/PSMB3/PSMD3/PSME3/PSMC5/PSMC4/PSMD1/PSMD2/PSMB1	13
R-HSA-1483257	Phospholipid metabolism	36/1829	212/10654	0.557869	1	0.907361	PIP5K1A/PIK3C2B/LPGAT1/ARF1/PI4K2A/OSBPL5/PITPNM1/GDPD5/PLBD1/ARF3/OSBPL8/CHPT1/GDE1/GDPD3/PCTP/MTMR4/PIP5K1C/MBOAT7/LPIN1/HADHA/INPP4A/PI4KA/PLD1/INPP4B/MTMR12/TNFAIP8/AGPAT1/FIG4/AGPAT4/PNPLA8/PLEKHA2/PIP5K1B/SLC44A1/PNPLA7/MTM1/TAZ	36
R-HSA-8853659	RET signaling	7/1829	41/10654	0.57097	1	0.907361	RET/DOK4/PRKACA/PLCG1/GAB1/PDLIM7/GFRA2	7
R-HSA-8875878	MET promotes cell motility	7/1829	41/10654	0.57097	1	0.907361	COL24A1/LAMC1/LAMB3/COL1A1/GAB1/TNS3/PTK2	7
R-HSA-9609736	Assembly and cell surface presentation of NMDA receptors	7/1829	41/10654	0.57097	1	0.907361	KIF17/CAMK2G/TUBB3/GRIN3B/TUBB4A/GRIN2D/CAMK2D	7
R-HSA-196071	Metabolism of steroid hormones	6/1829	35/10654	0.571343	1	0.907361	HSD11B1/CYP19A1/SRD5A3/STARD4/AKR1B1/STAR	6
R-HSA-380972	Energy dependent regulation of mTOR by LKB1-AMPK	5/1829	29/10654	0.572342	1	0.907361	MTOR/RRAGC/PRKAB1/CAB39L/RRAGD	5
R-HSA-390918	Peroxisomal lipid metabolism	5/1829	29/10654	0.572342	1	0.907361	SLC27A2/NUDT7/ACOX1/SLC25A17/CRAT	5
R-HSA-8863795	Downregulation of ERBB2 signaling	5/1829	29/10654	0.572342	1	0.907361	AKT1/MATK/NRG2/HBEGF/PTPN12	5
R-HSA-933541	TRAF6 mediated IRF7 activation	5/1829	29/10654	0.572342	1	0.907361	IKBKE/IRF7/RNF135/TRIM25/IFIH1	5
R-HSA-8873719	RAB geranylgeranylation	11/1829	65/10654	0.572345	1	0.907361	RAB3B/RAB13/CHML/RAB20/RAB27A/RAB37/RAB31/RAB3D/RAB3A/RAB43/RAB44	11
R-HSA-166208	mTORC1-mediated signalling	4/1829	23/10654	0.574399	1	0.907361	MTOR/RRAGC/RRAGD/EIF4EBP1	4
R-HSA-212676	Dopamine Neurotransmitter Release Cycle	4/1829	23/10654	0.574399	1	0.907361	PPFIA4/PPFIA1/RAB3A/STX1A	4
R-HSA-1810476	RIP-mediated NFkB activation via ZBP1	3/1829	17/10654	0.578453	1	0.907361	NFKB2/RIPK3/NFKBIA	3
R-HSA-196299	Beta-catenin phosphorylation cascade	3/1829	17/10654	0.578453	1	0.907361	FRAT1/FRAT2/PPP2R1A	3
R-HSA-199220	Vitamin B5 (pantothenate) metabolism	3/1829	17/10654	0.578453	1	0.907361	PANK4/SLC5A6/PANK3	3
R-HSA-2142845	Hyaluronan metabolism	3/1829	17/10654	0.578453	1	0.907361	SLC9A1/CD44/HYAL3	3
R-HSA-4655427	SUMOylation of DNA methylation proteins	3/1829	17/10654	0.578453	1	0.907361	PHC2/BMI1/CBX2	3
R-HSA-5656121	Translesion synthesis by POLI	3/1829	17/10654	0.578453	1	0.907361	MAD2L2/RPA2/POLI	3
R-HSA-6788467	IL-6-type cytokine receptor ligand interactions	3/1829	17/10654	0.578453	1	0.907361	TYK2/OSM/IL6ST	3
R-HSA-8934593	Regulation of RUNX1 Expression and Activity	3/1829	17/10654	0.578453	1	0.907361	CCND1/CCND3/CDK6	3
R-HSA-9034015	Signaling by NTRK3 (TRKC)	3/1829	17/10654	0.578453	1	0.907361	PTPRS/IRS1/PLCG1	3
R-HSA-937072	TRAF6-mediated induction of TAK1 complex within TLR4 complex	3/1829	17/10654	0.578453	1	0.907361	CD14/TAB2/LY96	3
R-HSA-5689880	Ub-specific processing proteases	37/1829	220/10654	0.583511	1	0.907361	MUL1/USP48/PSMA5/VDAC2/IDE/PSMD13/PSMA1/USP2/USP12/CCNA1/NFKBIA/SMAD3/CCP110/PSMD7/USP10/ARRB2/PSMB3/PSMD3/PSME3/PSMC5/SMAD7/PSMC4/IFIH1/USP37/PSMD1/ADRM1/TADA3/WDR48/USP19/RNF123/RUVBL1/PSMD2/VDAC1/ADRB2/PSMB1/TGFBR1/FOXO4	37
R-HSA-1433617	Regulation of signaling by NODAL	2/1829	11/10654	0.587006	1	0.907361	ACVR1B/ACVR1C	2
R-HSA-174414	Processive synthesis on the C-strand of the telomere	2/1829	11/10654	0.587006	1	0.907361	RPA2/POLD1	2
R-HSA-193692	Regulated proteolysis of p75NTR	2/1829	11/10654	0.587006	1	0.907361	APH1A/PSEN2	2
R-HSA-2514853	Condensation of Prometaphase Chromosomes	2/1829	11/10654	0.587006	1	0.907361	SMC4/NCAPG	2
R-HSA-351906	Apoptotic cleavage of cell adhesion proteins	2/1829	11/10654	0.587006	1	0.907361	OCLN/TJP2	2
R-HSA-376172	DSCAM interactions	2/1829	11/10654	0.587006	1	0.907361	MAPK11/MAPK13	2
R-HSA-77286	mitochondrial fatty acid beta-oxidation of saturated fatty acids	2/1829	11/10654	0.587006	1	0.907361	ACADS/HADHA	2
R-HSA-77588	SLBP Dependent Processing of Replication-Dependent Histone Pre-mRNAs	2/1829	11/10654	0.587006	1	0.907361	LSM10/ZNF473	2
R-HSA-8934903	Receptor Mediated Mitophagy	2/1829	11/10654	0.587006	1	0.907361	MAP1LC3A/ATG5	2
R-HSA-9614399	Regulation of localization of FOXO transcription factors	2/1829	11/10654	0.587006	1	0.907361	AKT1/FOXO4	2
R-HSA-174178	APC/C:Cdh1 mediated degradation of Cdc20 and other APC/C:Cdh1 targeted proteins in late mitosis/early G1	12/1829	72/10654	0.593846	1	0.907361	PSMA5/PSMD13/PSMA1/PSMD7/PSMB3/PSMD3/PSME3/PSMC5/PSMC4/PSMD1/PSMD2/PSMB1	12
R-HSA-156590	Glutathione conjugation	6/1829	36/10654	0.60061	1	0.907361	GSTM2/GSTM3/MGST1/GGT1/GSTK1/OPLAH	6
R-HSA-5663213	RHO GTPases Activate WASPs and WAVEs	6/1829	36/10654	0.60061	1	0.907361	MAPK3/BAIAP2/WIPF1/CYFIP2/PTK2/ABL1	6
R-HSA-110314	Recognition of DNA damage by PCNA-containing replication complex	5/1829	30/10654	0.604318	1	0.907361	RPA2/USP1/DDB1/POLD1/WDR48	5
R-HSA-114452	Activation of BH3-only proteins	5/1829	30/10654	0.604318	1	0.907361	AKT1/BCL2/BBC3/BCL2L11/BID	5
R-HSA-6804758	Regulation of TP53 Activity through Acetylation	5/1829	30/10654	0.604318	1	0.907361	AKT1/MAP2K6/ING5/ING2/BRPF3	5
R-HSA-8874081	MET activates PTK2 signaling	5/1829	30/10654	0.604318	1	0.907361	COL24A1/LAMC1/LAMB3/COL1A1/PTK2	5
R-HSA-3371571	HSF1-dependent transactivation	4/1829	24/10654	0.610006	1	0.907361	MTOR/CAMK2G/CAMK2D/HSP90AB1	4
R-HSA-449836	Other interleukin signaling	4/1829	24/10654	0.610006	1	0.907361	CSF3R/TYK2/CSF1R/STX1A	4
R-HSA-75876	Synthesis of very long-chain fatty acyl-CoAs	4/1829	24/10654	0.610006	1	0.907361	ELOVL1/SLC27A3/ACSL5/ACSL1	4
R-HSA-69002	DNA Replication Pre-Initiation	14/1829	85/10654	0.61277	1	0.907361	RPA2/PSMA5/PSMD13/PSMA1/PSMD7/PSMB3/PSMD3/PSME3/PSMC5/PSMC4/PSMD1/PSMD2/MCM3/PSMB1	14
R-HSA-3371497	HSP90 chaperone cycle for steroid hormone receptors (SHR)	9/1829	55/10654	0.618599	1	0.907361	ACTR1A/PGR/DNAJA2/DYNC1LI2/TUBB3/TUBB4A/DYNC1I2/NR3C1/HSP90AB1	9
R-HSA-9639288	Amino acids regulate mTORC1	9/1829	55/10654	0.618599	1	0.907361	MTOR/SESN2/RRAGC/ATP6V0B/ATP6V0D1/FNIP1/RRAGD/SESN1/ATP6V0E2	9
R-HSA-162710	Synthesis of glycosylphosphatidylinositol (GPI)	3/1829	18/10654	0.619287	1	0.907361	PIGV/PIGM/PIGB	3
R-HSA-5609975	Diseases associated with glycosylation precursor biosynthesis	3/1829	18/10654	0.619287	1	0.907361	PGM1/PMM2/SRD5A3	3
R-HSA-5675482	Regulation of necroptotic cell death	3/1829	18/10654	0.619287	1	0.907361	CFLAR/TNFSF10/TNFRSF10B	3
R-HSA-8963898	Plasma lipoprotein assembly	3/1829	18/10654	0.619287	1	0.907361	P4HB/PRKACA/ABCA1	3
R-HSA-75105	Fatty acyl-CoA biosynthesis	6/1829	37/10654	0.628762	1	0.907361	ELOVL1/SLC27A3/SCD/ACSL5/SCD5/ACSL1	6
R-HSA-182971	EGFR downregulation	5/1829	31/10654	0.63488	1	0.907361	CBL/EPN1/HBEGF/PTPN12/SH3KBP1	5
R-HSA-1296346	Tandem pore domain potassium channels	2/1829	12/10654	0.63633	1	0.907361	KCNK1/KCNK13	2
R-HSA-174403	Glutathione synthesis and recycling	2/1829	12/10654	0.63633	1	0.907361	GGT1/OPLAH	2
R-HSA-381033	ATF6 (ATF6-alpha) activates chaperones	2/1829	12/10654	0.63633	1	0.907361	HSP90B1/CALR	2
R-HSA-389359	CD28 dependent Vav1 pathway	2/1829	12/10654	0.63633	1	0.907361	VAV1/FYN	2
R-HSA-417957	P2Y receptors	2/1829	12/10654	0.63633	1	0.907361	P2RY2/P2RY6	2
R-HSA-73621	Pyrimidine catabolism	2/1829	12/10654	0.63633	1	0.907361	NT5C/TYMP	2
R-HSA-73817	Purine ribonucleoside monophosphate biosynthesis	2/1829	12/10654	0.63633	1	0.907361	PFAS/ATIC	2
R-HSA-8851680	Butyrophilin (BTN) family interactions	2/1829	12/10654	0.63633	1	0.907361	PPL/BTNL9	2
R-HSA-9027276	Erythropoietin activates Phosphoinositide-3-kinase (PI3K)	2/1829	12/10654	0.63633	1	0.907361	GAB1/LYN	2
R-HSA-5576891	Cardiac conduction	23/1829	141/10654	0.64154	1	0.907361	HIPK1/ATP1A1/ATP2B4/KCNK1/CAMK2G/KCNQ1/ITPR2/ATP2B1/KCNK13/CALM2/CALM1/CACNB1/PRKACA/DMPK/CALM3/SLC8A1/CACNB4/ITPR1/CAMK2D/KCNK5/ORAI2/KCNH2/KCND1	23
R-HSA-1296041	Activation of G protein gated Potassium channels	4/1829	25/10654	0.643714	1	0.907361	GNG5/GNG4/GNG7/GABBR2	4
R-HSA-1296059	G protein gated Potassium channels	4/1829	25/10654	0.643714	1	0.907361	GNG5/GNG4/GNG7/GABBR2	4
R-HSA-1643713	Signaling by EGFR in Cancer	4/1829	25/10654	0.643714	1	0.907361	CBL/PLCG1/GAB1/HBEGF	4
R-HSA-429947	Deadenylation of mRNA	4/1829	25/10654	0.643714	1	0.907361	TNKS1BP1/PAN3/CNOT11/PABPC1	4
R-HSA-9006115	Signaling by NTRK2 (TRKB)	4/1829	25/10654	0.643714	1	0.907361	CDK5R1/PLCG1/GAB1/FYN	4
R-HSA-937041	IKK complex recruitment mediated by RIP1	4/1829	25/10654	0.643714	1	0.907361	UBE2N/RIPK3/CD14/LY96	4
R-HSA-997272	Inhibition of voltage gated Ca2+ channels via Gbeta/gamma subunits	4/1829	25/10654	0.643714	1	0.907361	GNG5/GNG4/GNG7/GABBR2	4
R-HSA-983168	Antigen processing: Ubiquitination & Proteasome degradation	51/1829	309/10654	0.646662	1	0.907361	RNF19B/GLMN/PSMA5/KLHL20/PSMD13/PSMA1/UBE2N/FBXO21/FBXL22/UBE2Q2/BTBD1/SOCS1/RBBP6/PSMD7/ZNRF1/FBXO31/PSMB3/FBXL20/PSMD3/PSME3/PSMC5/SOCS3/RNF213/RNF126/PSMC4/UBE2M/FBXO41/PSMD1/ITCH/ARIH2/RNF123/KBTBD8/CBLB/PSMD2/RNF4/LNX1/RCHY1/LNPEP/PJA2/TRIM36/RNF14/RNF144B/CUL7/HACE1/PSMB1/ZNRF2/TRIM4/CUL1/UBE2W/RNF19A/UBAC1	51
R-HSA-190236	Signaling by FGFR	14/1829	87/10654	0.649264	1	0.907361	HNRNPF/FLRT1/CBL/MAPK3/POLR2E/GTF2F1/PPP2R1A/SPRED2/PLCG1/FGFRL1/FGFR3/GAB1/FGFR4/FGFR1	14
R-HSA-3371453	Regulation of HSF1-mediated heat shock response	11/1829	69/10654	0.655987	1	0.907361	RPA2/MAPKAPK2/MAPK3/NUP93/HSPA13/NUP210/ATR/HSPA4L/HSPA9/POM121/BAG1	11
R-HSA-1236382	Constitutive Signaling by Ligand-Responsive EGFR Cancer Variants	3/1829	19/10654	0.65734	1	0.907361	CBL/PLCG1/GAB1	3
R-HSA-5423646	Aflatoxin activation and detoxification	3/1829	19/10654	0.65734	1	0.907361	ACY3/MGST1/GGT1	3
R-HSA-5576886	Phase 4 - resting membrane potential	3/1829	19/10654	0.65734	1	0.907361	KCNK1/KCNK13/KCNK5	3
R-HSA-5637815	Signaling by Ligand-Responsive EGFR Variants in Cancer	3/1829	19/10654	0.65734	1	0.907361	CBL/PLCG1/GAB1	3
R-HSA-77595	Processing of Intronless Pre-mRNAs	3/1829	19/10654	0.65734	1	0.907361	PCF11/CPSF2/FIP1L1	3
R-HSA-888590	GABA synthesis, release, reuptake and degradation	3/1829	19/10654	0.65734	1	0.907361	SLC6A12/RAB3A/STX1A	3
R-HSA-375165	NCAM signaling for neurite out-growth	10/1829	63/10654	0.659179	1	0.907361	NCAM1/RPS6KA5/MAPK3/CACNB1/CACNB4/COL6A1/FYN/GFRA2/FGFR1/PTK2	10
R-HSA-2173796	SMAD2/SMAD3:SMAD4 heterotrimer regulates transcription	5/1829	32/10654	0.663944	1	0.907361	SMAD3/E2F4/TGIF1/SMAD7/SERPINE1	5
R-HSA-8941326	RUNX2 regulates bone development	5/1829	32/10654	0.663944	1	0.907361	MAPK3/COL1A1/YES1/ABL1/HDAC6	5
R-HSA-983169	Class I MHC mediated antigen processing & presentation	61/1829	371/10654	0.668413	1	0.907361	RNF19B/GLMN/PSMA5/KLHL20/SEC61A2/PSMD13/PSMA1/UBE2N/FBXO21/FBXL22/UBE2Q2/BTBD1/SOCS1/RBBP6/PSMD7/ZNRF1/FBXO31/PSMB3/FBXL20/PSMD3/PSME3/MRC2/PSMC5/SOCS3/RNF213/RNF126/CALR/PSMC4/UBE2M/FBXO41/VAMP8/PSMD1/ITCH/NCF4/ARIH2/RNF123/KBTBD8/CBLB/ITGB5/PSMD2/RNF4/LNX1/RCHY1/TLR2/LNPEP/PJA2/TRIM36/CD14/RNF14/RNF144B/CUL7/HACE1/PSMB1/ZNRF2/CD36/TRIM4/CUL1/UBE2W/LY96/RNF19A/UBAC1	61
R-HSA-3000178	ECM proteoglycans	12/1829	76/10654	0.672073	1	0.907361	HSPG2/LAMC1/LRP4/NCAM1/ITGA7/ITGAX/COL1A1/PTPRS/COL6A1/ITGA9/ITGB5/SERPINE1	12
R-HSA-2262752	Cellular responses to stress	79/1829	479/10654	0.674647	1	0.907361	MTOR/RPS6KA1/RPA2/SESN2/PHC2/RRAGC/ATP6V0B/CDKN2C/PSMA5/PRDX6/MAPKAPK2/BMI1/CAMK2G/ACTR1A/PSMD13/PSMA1/CAT/PGR/ETS1/TXNRD1/CCNA1/FOS/MAPK3/DNAJA2/NUP93/DYNC1LI2/ATP6V0D1/PSMD7/TUBB3/MAP2K3/PSMB3/PSMD3/PSME3/PSMC5/MAP2K6/CBX2/P4HB/TUBB4A/PSMC4/MAP4K4/DYNC1I2/PSMD1/CEBPB/HSPA13/ETS2/HIRA/TXN2/NCF4/CBX6/MAPK11/NUP210/HIGD1A/GPX1/ATR/TNIK/PSMD2/IGFBP7/CAMK2D/HSPA4L/LMNB1/FNIP1/HSPA9/NR3C1/VEGFA/HSP90…	79
R-HSA-77387	Insulin receptor recycling	4/1829	26/10654	0.675441	1	0.907361	ATP6V0B/ATP6V0D1/INSR/ATP6V0E2	4
R-HSA-1358803	Downregulation of ERBB2:ERBB3 signaling	2/1829	13/10654	0.6809	1	0.907361	AKT1/NRG2	2
R-HSA-140342	Apoptosis induced DNA fragmentation	2/1829	13/10654	0.6809	1	0.907361	HMGB1/HMGB2	2
R-HSA-1663150	The activation of arylsulfatases	2/1829	13/10654	0.6809	1	0.907361	ARSG/STS	2
R-HSA-1679131	Trafficking and processing of endosomal TLR	2/1829	13/10654	0.6809	1	0.907361	HSP90B1/CTSB	2
R-HSA-209543	p75NTR recruits signalling complexes	2/1829	13/10654	0.6809	1	0.907361	RIPK2/IRAK1	2
R-HSA-209560	NF-kB is activated and signals survival	2/1829	13/10654	0.6809	1	0.907361	NFKBIA/IRAK1	2
R-HSA-400511	Synthesis, secretion, and inactivation of Glucose-dependent Insulinotropic Polypeptide (GIP)	2/1829	13/10654	0.6809	1	0.907361	SPCS2/SEC11A	2
R-HSA-5357786	TNFR1-induced proapoptotic signaling	2/1829	13/10654	0.6809	1	0.907361	USP2/TNFAIP3	2
R-HSA-5654227	Phospholipase C-mediated cascade; FGFR3	2/1829	13/10654	0.6809	1	0.907361	PLCG1/FGFR3	2
R-HSA-5658623	FGFRL1 modulation of FGFR1 signaling	2/1829	13/10654	0.6809	1	0.907361	SPRED2/FGFRL1	2
R-HSA-8939211	ESR-mediated signaling	36/1829	223/10654	0.686178	1	0.907361	GNG5/POU2F1/GNG4/CTSD/CCND1/PGR/FOS/CALM2/CALM1/AKT1/GNB5/TLE3/MAPK3/DDX5/BCL2/POLR2E/GNG7/GTF2F1/PPP5C/CALM3/PRMT1/XPO1/ATF2/MMP9/ZNF217/NRIP1/PPID/HBEGF/HSP90AB1/MYB/TBP/HSPB1/GNAI1/PTK2/ELK1/STAG2	36
R-HSA-2980766	Nuclear Envelope Breakdown	8/1829	52/10654	0.689865	1	0.907361	LMNA/NUP93/CTDNEP1/LPIN1/NUP210/LMNB1/LEMD2/POM121	8
R-HSA-1592389	Activation of Matrix Metalloproteinases	5/1829	33/10654	0.691457	1	0.907361	FURIN/MMP25/TIMP2/MMP9/COL18A1	5
R-HSA-2559585	Oncogene Induced Senescence	5/1829	33/10654	0.691457	1	0.907361	CDKN2C/ETS1/MAPK3/ETS2/CDK6	5
R-HSA-5694530	Cargo concentration in the ER	5/1829	33/10654	0.691457	1	0.907361	CTSC/TMED10/PREB/CTSZ/COL7A1	5
R-HSA-8964043	Plasma lipoprotein clearance	5/1829	33/10654	0.691457	1	0.907361	SOAT1/NR1H3/SCARB1/APOBR/NPC1	5
R-HSA-164938	Nef-mediates down modulation of cell surface receptors by recruiting them to clathrin adapters	3/1829	20/10654	0.692567	1	0.907361	ARF1/AP1B1/AP1S2	3
R-HSA-9013695	NOTCH4 Intracellular Domain Regulates Transcription	3/1829	20/10654	0.692567	1	0.907361	SMAD3/RBPJ/MAML1	3
R-HSA-9603798	Class I peroxisomal membrane protein import	3/1829	20/10654	0.692567	1	0.907361	ATAD1/SLC25A17/GDAP1	3
R-HSA-5576892	Phase 0 - rapid depolarisation	7/1829	46/10654	0.696954	1	0.907361	CAMK2G/CALM2/CALM1/CACNB1/CALM3/CACNB4/CAMK2D	7
R-HSA-112314	Neurotransmitter receptors and postsynaptic signal transmission	33/1829	206/10654	0.698512	1	0.907361	KIF17/RPS6KA1/GNG5/GNG4/CAMK2G/NRGN/PRKAB1/ADCY4/CALM2/CALM1/PLCB2/GNB5/RASGRF1/MAPK3/TUBB3/GIT1/GRIN3B/GNG7/TUBB4A/PRKACA/CALM3/GRIN2D/ADCY3/EPB41L1/CAMK1/PRKAR2A/CAMK2D/CAMK4/ADCY1/GNAI1/NCALD/GABBR2/RPS6KA3	33
R-HSA-3108232	SUMO E3 ligases SUMOylate target proteins	29/1829	182/10654	0.701607	1	0.907361	PHC2/PIAS3/IKBKE/BMI1/NFKB2/NR1H3/PGR/NCOR2/NFKBIA/NUP93/DDX5/CBX2/NR4A2/SP100/TOP1/TFAP2C/NRIP1/PPARG/NUP210/TOP2B/MITF/NR1I2/FOXL2/ING2/NR3C1/TRIM27/POM121/RXRA/STAG2	29
R-HSA-380108	Chemokine receptors bind chemokines	9/1829	59/10654	0.704338	1	0.907361	CCL2/CCL4/CXCR4/CXCR2/CX3CR1/CCR1/CXCL1/CXCL10/CXCR3	9
R-HSA-167160	RNA Pol II CTD phosphorylation and interaction with CE during HIV infection	4/1829	27/10654	0.705148	1	0.907361	MNAT1/POLR2E/GTF2F1/ERCC2	4
R-HSA-264876	Insulin processing	4/1829	27/10654	0.705148	1	0.907361	RAB27A/EXOC1/EXOC3/STX1A	4
R-HSA-77075	RNA Pol II CTD phosphorylation and interaction with CE	4/1829	27/10654	0.705148	1	0.907361	MNAT1/POLR2E/GTF2F1/ERCC2	4
R-HSA-5654741	Signaling by FGFR3	6/1829	40/10654	0.705869	1	0.907361	CBL/MAPK3/PPP2R1A/PLCG1/FGFR3/GAB1	6
R-HSA-5674135	MAP2K and MAPK activation	6/1829	40/10654	0.705869	1	0.907361	APBB1IP/MARK3/MAPK3/ARRB2/IL17RD/ARAF	6
R-HSA-446728	Cell junction organization	14/1829	91/10654	0.716421	1	0.907361	LAMB3/RSU1/CD151/CADM1/PXN/CDH15/JUP/VASP/ITGA6/SDK1/CLDN12/CLDN23/PLEC/TESK1	14
R-HSA-5663084	Diseases of carbohydrate metabolism	5/1829	34/10654	0.717387	1	0.907361	GNS/NAGLU/GBE1/GYG1/IDUA	5
R-HSA-425366	Transport of bile salts and organic acids, metal ions and amine compounds	13/1829	85/10654	0.72027	1	0.907361	SLC22A15/SLC30A1/SLC6A12/SLC11A2/SLC16A3/SLC39A10/SLC11A1/SLC6A6/SLC39A8/EMB/SLC39A7/SLC44A1/SLC31A1	13
R-HSA-1250347	SHC1 events in ERBB4 signaling	2/1829	14/10654	0.720894	1	0.907361	NRG2/HBEGF	2
R-HSA-1614558	Degradation of cysteine and homocysteine	2/1829	14/10654	0.720894	1	0.907361	GOT2/TXN2	2
R-HSA-418885	DCC mediated attractive signaling	2/1829	14/10654	0.720894	1	0.907361	FYN/PTK2	2
R-HSA-419408	Lysosphingolipid and LPA receptors	2/1829	14/10654	0.720894	1	0.907361	S1PR5/LPAR1	2
R-HSA-428540	Activation of RAC1	2/1829	14/10654	0.720894	1	0.907361	NCK2/ROBO1	2
R-HSA-6803205	TP53 regulates transcription of several additional cell death genes whose specific roles in p53-dependent apoptosis remain uncertain	2/1829	14/10654	0.720894	1	0.907361	TP53I3/BCL6	2
R-HSA-69166	Removal of the Flap Intermediate	2/1829	14/10654	0.720894	1	0.907361	RPA2/POLD1	2
R-HSA-8964539	Glutamate and glutamine metabolism	2/1829	14/10654	0.720894	1	0.907361	GLUL/GOT2	2
R-HSA-9027284	Erythropoietin activates RAS	2/1829	14/10654	0.720894	1	0.907361	VAV1/LYN	2
R-HSA-6811442	Intra-Golgi and retrograde Golgi-to-ER traffic	32/1829	202/10654	0.720939	1	0.907361	STX6/ARF1/GALNT2/COG2/KIF26B/KIF20B/ACTR1A/BET1L/ARF3/COPZ1/TMED10/MAN2A2/DYNC1LI2/TUBB3/KIF19/TUBB4A/STX10/PAFAH1B3/KIF3C/DYNC1I2/ARFRP1/CYTH4/RAB43/STX18/SCOC/RHOBTB3/BNIP1/MAN1A1/CYTH3/YKT6/CUX1/KIF13B	32
R-HSA-6806834	Signaling by MET	12/1829	79/10654	0.724652	1	0.907361	COL24A1/LAMC1/LAMB3/CBL/ARF6/COL1A1/PTPN2/LRIG1/GAB1/TNS3/PTK2/SH3KBP1	12
R-HSA-159231	Transport of Mature mRNA Derived from an Intronless Transcript	6/1829	41/10654	0.728995	1	0.907361	NXF1/CPSF2/NUP93/NUP210/FIP1L1/POM121	6
R-HSA-5654743	Signaling by FGFR4	6/1829	41/10654	0.728995	1	0.907361	CBL/MAPK3/PPP2R1A/PLCG1/GAB1/FGFR4	6
R-HSA-74751	Insulin receptor signalling cascade	8/1829	54/10654	0.731064	1	0.907361	PDE3B/MAPK3/INSR/IRS1/FGFR3/GAB1/FGFR4/FGFR1	8
R-HSA-8953897	Cellular responses to external stimuli	80/1829	493/10654	0.732534	1	0.907361	MTOR/RPS6KA1/RPA2/SESN2/PHC2/RRAGC/ATP6V0B/CDKN2C/PSMA5/PRDX6/MAPKAPK2/BMI1/CAMK2G/ACTR1A/PSMD13/PSMA1/CAT/PGR/ETS1/TXNRD1/CCNA1/FOS/MAPK3/DNAJA2/MT2A/NUP93/DYNC1LI2/ATP6V0D1/PSMD7/TUBB3/MAP2K3/PSMB3/PSMD3/PSME3/PSMC5/MAP2K6/CBX2/P4HB/TUBB4A/PSMC4/MAP4K4/DYNC1I2/PSMD1/CEBPB/HSPA13/ETS2/HIRA/TXN2/NCF4/CBX6/MAPK11/NUP210/HIGD1A/GPX1/ATR/TNIK/PSMD2/IGFBP7/CAMK2D/HSPA4L/LMNB1/FNIP1/HSPA9/NR3C1/VEGFA/…	80
R-HSA-1483191	Synthesis of PC	4/1829	28/10654	0.732829	1	0.907361	CHPT1/PCTP/LPIN1/SLC44A1	4
R-HSA-201451	Signaling by BMP	4/1829	28/10654	0.732829	1	0.907361	ACVRL1/NOG/SMAD7/BMP2	4
R-HSA-69205	G1/S-Specific Transcription	4/1829	28/10654	0.732829	1	0.907361	CCNA1/E2F4/RRM2/FBXO5	4
R-HSA-948021	Transport to the Golgi and subsequent modification	29/1829	185/10654	0.735183	1	0.907361	FUCA1/B4GALT3/ARF1/COG2/ACTR1A/BET1L/CTSC/ST3GAL4/ARF3/COPZ1/MGAT2/TMED10/MAN2A2/DYNC1LI2/TUBB3/TUBB4A/PREB/MGAT4A/MGAT5/DYNC1I2/B4GALT5/CTSZ/ANKRD28/GORASP1/COL7A1/MGAT4B/MGAT1/MAN1A1/YKT6	29
R-HSA-195721	Signaling by WNT	53/1829	331/10654	0.736021	1	0.907361	CTNNBIP1/RUNX3/WLS/GNG5/PSMA5/GNG4/VPS26A/FRAT1/FRAT2/CTBP2/PSMD13/PSMA1/BCL9L/ITPR2/PRICKLE1/DAAM1/CALM2/CALM1/CCDC88C/AKT1/PLCB2/GNB5/TLE3/PSMD7/ARRB2/DVL2/PSMB3/PSMD3/PSME3/PSMC5/RAC3/NFATC1/GNG7/PSMC4/CALM3/PPP2R1A/XPO1/FZD7/PSMD1/RAC2/WNT7B/ITPR1/RUVBL1/PSMD2/PPP3CA/DKK2/TCF7/PSMB1/CUL1/SOX7/PIP5K1B/TLE4/TLE1	53
R-HSA-983712	Ion channel transport	29/1829	186/10654	0.74585	1	0.907361	ATP13A2/ATP6V0B/ATP1A1/ATP2B4/CAMK2G/ANO9/TPCN2/ANO6/ATP2B1/RIPK3/CALM2/CALM1/UNC79/ATP8B4/CLCN7/ATP6V0D1/ATP8B1/ATP8B3/ANO8/CALM3/TRPM2/ANO10/ATP11B/CAMK2D/SGK1/TTYH3/ATP6V0E2/ASIC3/CLCN4	29
R-HSA-159234	Transport of Mature mRNAs Derived from Intronless Transcripts	6/1829	42/10654	0.750808	1	0.907361	NXF1/CPSF2/NUP93/NUP210/FIP1L1/POM121	6
R-HSA-392154	Nitric oxide stimulates guanylate cyclase	3/1829	22/10654	0.754665	1	0.907361	MRVI1/PDE1B/ITPR1	3
R-HSA-5655332	Signaling by FGFR3 in disease	3/1829	22/10654	0.754665	1	0.907361	PLCG1/FGFR3/GAB1	3
R-HSA-8853338	Signaling by FGFR3 point mutants in cancer	3/1829	22/10654	0.754665	1	0.907361	PLCG1/FGFR3/GAB1	3
R-HSA-9609523	Insertion of tail-anchored proteins into the endoplasmic reticulum membrane	3/1829	22/10654	0.754665	1	0.907361	SGTA/OTOF/STX1A	3
R-HSA-381426	Regulation of Insulin-like Growth Factor (IGF) transport and uptake by Insulin-like Growth Factor Binding Proteins (IGFBPs)	19/1829	125/10654	0.755816	1	0.907361	MXRA8/QSOX1/LAMC1/RCN1/HSP90B1/GAS6/ADAM10/MFGE8/IGFBP4/P4HB/FSTL3/ANO8/MGAT4A/LGALS1/TF/IGFBP7/FAM20C/SDC2/GOLM1	19
R-HSA-3134975	Regulation of innate immune responses to cytosolic DNA	2/1829	15/10654	0.756568	1	0.907361	DTX4/TREX1	2
R-HSA-354194	GRB2:SOS provides linkage to MAPK signaling for Integrins	2/1829	15/10654	0.756568	1	0.907361	APBB1IP/PTK2	2
R-HSA-5099900	WNT5A-dependent internalization of FZD4	2/1829	15/10654	0.756568	1	0.907361	ARRB2/DVL2	2
R-HSA-5654228	Phospholipase C-mediated cascade; FGFR4	2/1829	15/10654	0.756568	1	0.907361	PLCG1/FGFR4	2
R-HSA-69183	Processive synthesis on the lagging strand	2/1829	15/10654	0.756568	1	0.907361	RPA2/POLD1	2
R-HSA-8875360	InlB-mediated entry of Listeria monocytogenes into host cell	2/1829	15/10654	0.756568	1	0.907361	CBL/SH3KBP1	2
R-HSA-937039	IRAK1 recruits IKK complex	2/1829	15/10654	0.756568	1	0.907361	UBE2N/IRAK1	2
R-HSA-975144	IRAK1 recruits IKK complex upon TLR7/8 or 9 stimulation	2/1829	15/10654	0.756568	1	0.907361	UBE2N/IRAK1	2
R-HSA-5654732	Negative regulation of FGFR3 signaling	4/1829	29/10654	0.758507	1	0.907361	CBL/MAPK3/PPP2R1A/FGFR3	4
R-HSA-72086	mRNA Capping	4/1829	29/10654	0.758507	1	0.907361	MNAT1/POLR2E/GTF2F1/ERCC2	4
R-HSA-69239	Synthesis of DNA	18/1829	119/10654	0.758967	1	0.907361	RPA2/PSMA5/PSMD13/PSMA1/CCNA1/PSMD7/PSMB3/PSMD3/PSME3/PSMC5/PSMC4/POLD1/PSMD1/PSMD2/MCM3/PSMB1/CUL1/CCNE2	18
R-HSA-6811440	Retrograde transport at the Trans-Golgi-Network	7/1829	49/10654	0.759735	1	0.907361	STX6/COG2/STX10/ARFRP1/RAB43/SCOC/RHOBTB3	7
R-HSA-68877	Mitotic Prometaphase	31/1829	200/10654	0.763096	1	0.907361	NUF2/CENPF/SDCCAG8/ACTR1A/NUMA1/CENPJ/CCP110/DYNC1LI2/TUBB3/TUBB4A/PRKACA/HAUS8/PPP2R1A/CENPA/XPO1/ALMS1/CLASP1/DYNC1I2/PCNT/CEP70/SMC4/NCAPG/CEP135/PLK4/CENPK/FGFR1OP/MAD1L1/CNTRL/CENPI/STAG2/HAUS7	31
R-HSA-176033	Interactions of Vpr with host cellular proteins	5/1829	36/10654	0.764489	1	0.907361	NUP93/NUP210/SLC25A4/POM121/SLC25A5	5
R-HSA-2514859	Inactivation, recovery and regulation of the phototransduction cascade	5/1829	36/10654	0.764489	1	0.907361	CALM2/CALM1/GNB5/NMT1/CALM3	5
R-HSA-6802948	Signaling by high-kinase activity BRAF mutants	5/1829	36/10654	0.764489	1	0.907361	APBB1IP/MARK3/MAPK3/ARRB2/ARAF	5
R-HSA-2990846	SUMOylation	29/1829	188/10654	0.766376	1	0.907361	PHC2/PIAS3/IKBKE/BMI1/NFKB2/NR1H3/PGR/NCOR2/NFKBIA/NUP93/DDX5/CBX2/NR4A2/SP100/TOP1/TFAP2C/NRIP1/PPARG/NUP210/TOP2B/MITF/NR1I2/FOXL2/ING2/NR3C1/TRIM27/POM121/RXRA/STAG2	29
R-HSA-977443	GABA receptor activation	8/1829	56/10654	0.768374	1	0.907361	GNG5/GNG4/ADCY4/GNG7/ADCY3/ADCY1/GNAI1/GABBR2	8
R-HSA-194068	Bile acid and bile salt metabolism	6/1829	43/10654	0.771315	1	0.907361	AKR1C2/AKR1C1/AKR1C3/SLC27A2/HSD3B7/RXRA	6
R-HSA-5696395	Formation of Incision Complex in GG-NER	6/1829	43/10654	0.771315	1	0.907361	RPA2/PIAS3/DDB1/UBE2N/MNAT1/ERCC2	6
R-HSA-428157	Sphingolipid metabolism	13/1829	89/10654	0.780098	1	0.907361	NEU3/ESYT1/B4GALNT1/SPTLC2/ORMDL3/ARSG/CERS1/PRKD2/GM2A/ESYT2/ACER2/GBA2/STS	13
R-HSA-2173795	Downregulation of SMAD2/3:SMAD4 transcriptional activity	3/1829	23/10654	0.781705	1	0.907361	NCOR2/SMAD3/TGIF1	3
R-HSA-373753	Nephrin family interactions	3/1829	23/10654	0.781705	1	0.907361	ACTN4/NCK2/FYN	3
R-HSA-389948	PD-1 signaling	3/1829	23/10654	0.781705	1	0.907361	PTPN6/HLA-DRA/CD274	3
R-HSA-5620922	BBSome-mediated cargo-targeting to cilium	3/1829	23/10654	0.781705	1	0.907361	CCT3/MKKS/LZTFL1	3
R-HSA-5357956	TNFR1-induced NFkappaB signaling pathway	4/1829	30/10654	0.782228	1	0.907361	USP2/RNF31/TNFAIP3/TAB2	4
R-HSA-5683826	Surfactant metabolism	4/1829	30/10654	0.782228	1	0.907361	ADRA2A/P2RY2/CTSH/CSF2RB	4
R-HSA-8963899	Plasma lipoprotein remodeling	4/1829	30/10654	0.782228	1	0.907361	FURIN/PCSK6/LCAT/PLTP	4
R-HSA-6784531	tRNA processing in the nucleus	8/1829	57/10654	0.785568	1	0.907361	ZBTB8OS/NUP93/ELAC2/DDX1/NUP210/RPP14/POM121/POP1	8
R-HSA-2514856	The phototransduction cascade	5/1829	37/10654	0.785696	1	0.907361	CALM2/CALM1/GNB5/NMT1/CALM3	5
R-HSA-5685938	HDR through Single Strand Annealing (SSA)	5/1829	37/10654	0.785696	1	0.907361	RPA2/EXO1/RHNO1/ATR/ABL1	5
R-HSA-110312	Translesion synthesis by REV1	2/1829	16/10654	0.788227	1	0.907361	MAD2L2/RPA2	2
R-HSA-156711	Polo-like kinase mediated events	2/1829	16/10654	0.788227	1	0.907361	CENPF/CDC25C	2
R-HSA-1963640	GRB2 events in ERBB2 signaling	2/1829	16/10654	0.788227	1	0.907361	NRG2/HBEGF	2
R-HSA-205043	NRIF signals cell death from the nucleus	2/1829	16/10654	0.788227	1	0.907361	APH1A/PSEN2	2
R-HSA-2173791	TGF-beta receptor signaling in EMT (epithelial to mesenchymal transition)	2/1829	16/10654	0.788227	1	0.907361	FKBP1A/TGFBR1	2
R-HSA-2559584	Formation of Senescence-Associated Heterochromatin Foci (SAHF)	2/1829	16/10654	0.788227	1	0.907361	HIRA/LMNB1	2
R-HSA-3229121	Glycogen storage diseases	2/1829	16/10654	0.788227	1	0.907361	GBE1/GYG1	2
R-HSA-392517	Rap1 signalling	2/1829	16/10654	0.788227	1	0.907361	SIPA1/PRKACA	2
R-HSA-418038	Nucleotide-like (purinergic) receptors	2/1829	16/10654	0.788227	1	0.907361	P2RY2/P2RY6	2
R-HSA-5654219	Phospholipase C-mediated cascade: FGFR1	2/1829	16/10654	0.788227	1	0.907361	PLCG1/FGFR1	2
R-HSA-109704	PI3K Cascade	6/1829	44/10654	0.790535	1	0.907361	PDE3B/IRS1/FGFR3/GAB1/FGFR4/FGFR1	6
R-HSA-2173793	Transcriptional activity of SMAD2/SMAD3:SMAD4 heterotrimer	6/1829	44/10654	0.790535	1	0.907361	NCOR2/SMAD3/E2F4/TGIF1/SMAD7/SERPINE1	6
R-HSA-2672351	Stimuli-sensing channels	16/1829	109/10654	0.791371	1	0.907361	ANO9/TPCN2/ANO6/RIPK3/CALM2/CALM1/UNC79/CLCN7/ANO8/CALM3/TRPM2/ANO10/SGK1/TTYH3/ASIC3/CLCN4	16
R-HSA-8951664	Neddylation	36/1829	234/10654	0.791847	1	0.907361	WDTC1/PSMA5/DCAF6/KLHL20/PSMD13/PSMA1/DDB1/SOCS2/FBXO21/DCAF4/FBXL22/BTBD1/PSMD7/FBXO31/PSMB3/FBXL20/PSMD3/PSME3/PSMC5/SOCS3/FEM1A/PSMC4/UBE2M/FBXO41/PSMD1/COMMD7/KBTBD8/PSMD2/UBXN7/DCUN1D4/FEM1C/CUL7/TULP4/PSMB1/CUL1/DCAF13	36
R-HSA-2980736	Peptide hormone metabolism	13/1829	90/10654	0.793552	1	0.907361	CTSD/SPCS2/RAB27A/SEC11A/ANPEP/CES1/ACE/CTSZ/GHRL/EXOC1/EXOC3/STX1A/KLF4	13
R-HSA-8876198	RAB GEFs exchange GTP for GDP on RABs	13/1829	90/10654	0.793552	1	0.907361	RAB13/DENND1B/CHML/RAB3IL1/AKT1/RAB27A/RAB31/DENND1C/RAB3A/HPS4/DENND6B/TRAPPC13/DENND4C	13
R-HSA-6811436	COPI-independent Golgi-to-ER retrograde traffic	7/1829	51/10654	0.796024	1	0.907361	GALNT2/ACTR1A/DYNC1LI2/TUBB3/TUBB4A/PAFAH1B3/DYNC1I2	7
R-HSA-5688426	Deubiquitination	46/1829	297/10654	0.802916	1	0.907361	MUL1/USP48/PSMA5/NLRP3/VDAC2/IDE/PSMD13/PSMA1/USP2/USP12/CCNA1/NFKBIA/TRAF3/SMAD3/CCP110/NOD2/PSMD7/USP10/ARRB2/RNF135/PSMB3/PSMD3/PSME3/TRIM25/PSMC5/SMAD7/PSMC4/ASXL2/IFIH1/USP37/PSMD1/ADRM1/TADA3/WDR48/USP19/RNF123/RUVBL1/PSMD2/VDAC1/ADRB2/TNFAIP3/PSMB1/FOXK1/RIPK2/TGFBR1/FOXO4	46
R-HSA-1296065	Inwardly rectifying K+ channels	4/1829	31/10654	0.804058	1	0.907361	GNG5/GNG4/GNG7/GABBR2	4
R-HSA-168333	NEP/NS2 Interacts with the Cellular Export Machinery	4/1829	31/10654	0.804058	1	0.907361	NUP93/XPO1/NUP210/POM121	4
R-HSA-4641262	Disassembly of the destruction complex and recruitment of AXIN to the membrane	4/1829	31/10654	0.804058	1	0.907361	FRAT1/FRAT2/DVL2/PPP2R1A	4
R-HSA-5654687	Downstream signaling of activated FGFR1	4/1829	31/10654	0.804058	1	0.907361	FLRT1/PLCG1/GAB1/FGFR1	4
R-HSA-5654733	Negative regulation of FGFR4 signaling	4/1829	31/10654	0.804058	1	0.907361	CBL/MAPK3/PPP2R1A/FGFR4	4
R-HSA-416476	G alpha (q) signalling events	33/1829	217/10654	0.805044	1	0.907361	RPS6KA1/PTAFR/GNG5/RGS16/AVPR1B/GNG4/GRK5/P2RY2/P2RY6/ITPR2/LTB4R2/LTB4R/PRKCH/GPR65/GPR68/PLCB2/GNB5/NMB/MAPK3/GNG7/GNA15/TBXA2R/PRKCE/NMUR1/NTSR1/ITPR1/GHRL/HRH1/DGKG/HBEGF/LPAR1/RGS3/RPS6KA3	33
R-HSA-8939243	RUNX1 interacts with co-factors whose precise effect on RUNX1 targets is not known	5/1829	38/10654	0.805389	1	0.907361	PHC2/BMI1/CBX2/CBX6/SMARCA2	5
R-HSA-74752	Signaling by Insulin receptor	11/1829	78/10654	0.806081	1	0.907361	ATP6V0B/PDE3B/MAPK3/ATP6V0D1/INSR/IRS1/FGFR3/GAB1/FGFR4/ATP6V0E2/FGFR1	11
R-HSA-163560	Triglyceride catabolism	3/1829	24/10654	0.806234	1	0.907361	FABP3/PRKACA/PNPLA4	3
R-HSA-69242	S Phase	24/1829	161/10654	0.806899	1	0.907361	RPA2/PSMA5/PSMD13/PSMA1/CCND1/CCNA1/MNAT1/AKT1/E2F4/PSMD7/PSMB3/PSMD3/PSME3/PSMC5/PSMC4/POLD1/PSMD1/PTK6/PSMD2/MCM3/PSMB1/CUL1/CCNE2/STAG2	24
R-HSA-6796648	TP53 Regulates Transcription of DNA Repair Genes	9/1829	65/10654	0.807665	1	0.907361	MNAT1/FOS/CDK12/POLR2E/GTF2F1/ELL/ERCC2/ATF2/ATR	9
R-HSA-4615885	SUMOylation of DNA replication proteins	6/1829	45/10654	0.808492	1	0.907361	PIAS3/NUP93/TOP1/NUP210/TOP2B/POM121	6
R-HSA-1482922	Acyl chain remodelling of PI	2/1829	17/10654	0.816197	1	0.907361	PLBD1/MBOAT7	2
R-HSA-5655862	Translesion synthesis by POLK	2/1829	17/10654	0.816197	1	0.907361	MAD2L2/RPA2	2
R-HSA-9007101	Rab regulation of trafficking	18/1829	124/10654	0.816765	1	0.907361	RAB13/DENND1B/CHML/OPTN/RAB3IL1/TBC1D15/ARF6/AKT1/RAB27A/RAB31/DENND1C/RAB3A/TBC1D17/HPS4/DENND6B/TRAPPC13/DENND4C/TBC1D2	18
R-HSA-6804756	Regulation of TP53 Activity through Phosphorylation	13/1829	92/10654	0.81867	1	0.907361	RPA2/PLK3/HIPK1/EXO1/RHNO1/PRKAB1/CCNA1/CDK5R1/MAPK11/ATR/TAF9/TBP/TP53INP1	13
R-HSA-390471	Association of TriC/CCT with target proteins during biosynthesis	5/1829	39/10654	0.823617	1	0.907361	CCT3/KIFC3/CCT7/CCT6A/CCNE2	5
R-HSA-5693616	Presynaptic phase of homologous DNA pairing and strand exchange	5/1829	39/10654	0.823617	1	0.907361	RPA2/EXO1/RHNO1/BRCA2/ATR	5
R-HSA-5619102	SLC transporter disorders	14/1829	99/10654	0.824619	1	0.907361	SLC35A3/AVPR1B/HK1/SLC35C1/SLC11A2/SLC7A7/NUP93/NUP210/SLC1A3/SLC26A2/POM121/SLC20A2/SLC34A3/AVPR2	14
R-HSA-5654708	Downstream signaling of activated FGFR3	3/1829	25/10654	0.828396	1	0.907361	PLCG1/FGFR3/GAB1	3
R-HSA-211945	Phase I - Functionalization of compounds	15/1829	106/10654	0.830344	1	0.907361	EPHX1/ALDH2/CYP19A1/CES1/CYP1B1/CYP26B1/ACSS1/ACSS2/CYP4V2/HSP90AB1/AHR/POR/TBXAS1/PTGS1/RXRA	15
R-HSA-8856825	Cargo recognition for clathrin-mediated endocytosis	15/1829	106/10654	0.830344	1	0.907361	SYT2/CBL/ARRB2/DVL2/FCHO1/EPN1/VAMP8/ITSN1/TF/SCARB2/IL7R/HBEGF/ADRB2/SH3KBP1/AVPR2	15
R-HSA-2555396	Mitotic Metaphase and Anaphase	30/1829	202/10654	0.835197	1	0.907361	PSMA5/LMNA/NUF2/CENPF/PSMD13/PSMA1/DYNC1LI2/PSMD7/TUBB3/PSMB3/PSMD3/PSME3/PSMC5/TUBB4A/PSMC4/PPP2R1A/CENPA/XPO1/CLASP1/DYNC1I2/PSMD1/PSMD2/CENPK/LMNB1/LEMD2/FBXO5/PSMB1/MAD1L1/CENPI/STAG2	30
R-HSA-162599	Late Phase of HIV Life Cycle	20/1829	139/10654	0.838393	1	0.907361	VPS37B/MNAT1/FURIN/NUP93/VPS4A/NMT1/POLR2E/GTF2F1/MVB12A/ELL/ERCC2/XPO1/CHMP4B/NUP210/TAF9/TBP/POM121/VPS37D/CHMP5/MVB12B	20
R-HSA-168276	NS1 Mediated Effects on Host Pathways	5/1829	40/10654	0.840438	1	0.907361	ISG15/NUP93/EIF2AK2/NUP210/POM121	5
R-HSA-397014	Muscle contraction	31/1829	209/10654	0.840621	1	0.907361	HIPK1/ATP1A1/ATP2B4/KCNK1/VIM/CAMK2G/KCNQ1/ITPR2/MYL6/ATP2B1/PXN/KCNK13/CALM2/CALM1/CACNB1/MYL12A/PRKACA/DMPK/CALM3/TNNT1/SLC8A1/CACNB4/ITPR1/ITGB5/CAMK2D/KCNK5/ORAI2/KCNH2/TPM2/TMOD1/KCND1	31
R-HSA-167161	HIV Transcription Initiation	6/1829	47/10654	0.840768	1	0.907361	MNAT1/POLR2E/GTF2F1/ERCC2/TAF9/TBP	6
R-HSA-167162	RNA Polymerase II HIV Promoter Escape	6/1829	47/10654	0.840768	1	0.907361	MNAT1/POLR2E/GTF2F1/ERCC2/TAF9/TBP	6
R-HSA-4570464	SUMOylation of RNA binding proteins	6/1829	47/10654	0.840768	1	0.907361	PHC2/BMI1/NUP93/CBX2/NUP210/POM121	6
R-HSA-73776	RNA Polymerase II Promoter Escape	6/1829	47/10654	0.840768	1	0.907361	MNAT1/POLR2E/GTF2F1/ERCC2/TAF9/TBP	6
R-HSA-73779	RNA Polymerase II Transcription Pre-Initiation And Promoter Opening	6/1829	47/10654	0.840768	1	0.907361	MNAT1/POLR2E/GTF2F1/ERCC2/TAF9/TBP	6
R-HSA-75953	RNA Polymerase II Transcription Initiation	6/1829	47/10654	0.840768	1	0.907361	MNAT1/POLR2E/GTF2F1/ERCC2/TAF9/TBP	6
R-HSA-76042	RNA Polymerase II Transcription Initiation And Promoter Clearance	6/1829	47/10654	0.840768	1	0.907361	MNAT1/POLR2E/GTF2F1/ERCC2/TAF9/TBP	6
R-HSA-1369062	ABC transporters in lipid homeostasis	2/1829	18/10654	0.840811	1	0.907361	ABCA5/ABCA7	2
R-HSA-190840	Microtubule-dependent trafficking of connexons from Golgi to the plasma membrane	2/1829	18/10654	0.840811	1	0.907361	TUBB3/TUBB4A	2
R-HSA-2243919	Crosslinking of collagen fibrils	2/1829	18/10654	0.840811	1	0.907361	COL1A1/LOXL2	2
R-HSA-5654710	PI-3K cascade:FGFR3	2/1829	18/10654	0.840811	1	0.907361	FGFR3/GAB1	2
R-HSA-8963889	Assembly of active LPL and LIPC lipase complexes	2/1829	18/10654	0.840811	1	0.907361	FURIN/PCSK6	2
R-HSA-9037629	Lewis blood group biosynthesis	2/1829	18/10654	0.840811	1	0.907361	ST3GAL4/ST3GAL6	2
R-HSA-5663205	Infectious disease	59/1829	383/10654	0.841571	1	0.907361	ISG15/PSMA5/SYT2/ARF1/PSMD13/PSMA1/CBL/TXNRD1/VPS37B/IPO5/MNAT1/CALM2/CALM1/FURIN/NUP93/VPS4A/PSMD7/MAP2K3/PSMB3/PSMD3/PSME3/NMT1/PSMC5/MAP2K6/POLR2E/EEF2/GTF2F1/CALR/MVB12A/ELL/PSMC4/ERCC2/CALM3/EIF2AK2/XPO1/CXCR4/PSMD1/HCK/CHMP4B/AP1B1/NUP210/PSMD2/ANTXR2/SLC25A4/TAF9/HBEGF/RPL10A/HSP90AB1/FYN/PSMB1/TBP/POM121/VPS37D/STX1A/CHMP5/MVB12B/AP1S2/SH3KBP1/SLC25A5	59
R-HSA-113418	Formation of the Early Elongation Complex	4/1829	33/10654	0.842366	1	0.907361	MNAT1/POLR2E/GTF2F1/ERCC2	4
R-HSA-167158	Formation of the HIV-1 Early Elongation Complex	4/1829	33/10654	0.842366	1	0.907361	MNAT1/POLR2E/GTF2F1/ERCC2	4
R-HSA-168274	Export of Viral Ribonucleoproteins from Nucleus	4/1829	33/10654	0.842366	1	0.907361	NUP93/XPO1/NUP210/POM121	4
R-HSA-5357905	Regulation of TNFR1 signaling	4/1829	33/10654	0.842366	1	0.907361	USP2/RNF31/CLIP3/TNFAIP3	4
R-HSA-5654726	Negative regulation of FGFR1 signaling	4/1829	33/10654	0.842366	1	0.907361	CBL/MAPK3/PPP2R1A/FGFR1	4
R-HSA-5693568	Resolution of D-loop Structures through Holliday Junction Intermediates	4/1829	33/10654	0.842366	1	0.907361	EXO1/BRCA2/EME2/GEN1	4
R-HSA-69306	DNA Replication	18/1829	127/10654	0.846249	1	0.907361	RPA2/PSMA5/PSMD13/PSMA1/CCNA1/PSMD7/PSMB3/PSMD3/PSME3/PSMC5/PSMC4/POLD1/PSMD1/PSMD2/MCM3/PSMB1/CUL1/CCNE2	18
R-HSA-5663220	RHO GTPases Activate Formins	20/1829	140/10654	0.847324	1	0.907361	NUF2/CENPF/DAAM1/EVL/DYNC1LI2/TUBB3/DVL2/FMNL1/TUBB4A/PPP2R1A/CENPA/XPO1/CLASP1/FMNL2/DYNC1I2/CENPK/DIAPH1/MAD1L1/SCAI/CENPI	20
R-HSA-112311	Neurotransmitter clearance	1/1829	10/10654	0.848071	1	0.907361	ALDH2	1
R-HSA-1483115	Hydrolysis of LPC	1/1829	10/10654	0.848071	1	0.907361	PLBD1	1
R-HSA-1855167	Synthesis of pyrophosphates in the cytosol	1/1829	10/10654	0.848071	1	0.907361	ITPK1	1
R-HSA-194002	Glucocorticoid biosynthesis	1/1829	10/10654	0.848071	1	0.907361	HSD11B1	1
R-HSA-2161522	Abacavir transport and metabolism	1/1829	10/10654	0.848071	1	0.907361	ADAL	1
R-HSA-2465910	MASTL Facilitates Mitotic Progression	1/1829	10/10654	0.848071	1	0.907361	PPP2R1A	1
R-HSA-2470946	Cohesin Loading onto Chromatin	1/1829	10/10654	0.848071	1	0.907361	STAG2	1
R-HSA-425381	Bicarbonate transporters	1/1829	10/10654	0.848071	1	0.907361	SLC4A7	1
R-HSA-428643	Organic anion transporters	1/1829	10/10654	0.848071	1	0.907361	SLC17A7	1
R-HSA-549127	Organic cation transport	1/1829	10/10654	0.848071	1	0.907361	SLC22A15	1
R-HSA-5687613	Diseases associated with surfactant metabolism	1/1829	10/10654	0.848071	1	0.907361	CSF2RB	1
R-HSA-70635	Urea cycle	1/1829	10/10654	0.848071	1	0.907361	SLC25A15	1
R-HSA-8868766	rRNA processing in the mitochondrion	1/1829	10/10654	0.848071	1	0.907361	ELAC2	1
R-HSA-937042	IRAK2 mediated activation of TAK1 complex	1/1829	10/10654	0.848071	1	0.907361	TAB2	1
R-HSA-9617629	Regulation of FOXO transcriptional activity by acetylation	1/1829	10/10654	0.848071	1	0.907361	FOXO4	1
R-HSA-1187000	Fertilization	3/1829	26/10654	0.848346	1	0.907361	OVGP1/HVCN1/IZUMO4	3
R-HSA-3238698	WNT ligand biogenesis and trafficking	3/1829	26/10654	0.848346	1	0.907361	WLS/VPS26A/WNT7B	3
R-HSA-6803529	FGFR2 alternative splicing	3/1829	26/10654	0.848346	1	0.907361	HNRNPF/POLR2E/GTF2F1	3
R-HSA-390466	Chaperonin-mediated protein folding	13/1829	95/10654	0.851985	1	0.907361	GNG5/CCT3/GNG4/GNB5/KIFC3/TUBB3/GNG7/TUBB4A/CCT7/PFDN1/CCT6A/GNAI1/CCNE2	13
R-HSA-112399	IRS-mediated signalling	6/1829	48/10654	0.855174	1	0.907361	PDE3B/IRS1/FGFR3/GAB1/FGFR4/FGFR1	6
R-HSA-159227	Transport of the SLBP independent Mature mRNA	4/1829	34/10654	0.85903	1	0.907361	NXF1/NUP93/NUP210/POM121	4
R-HSA-165054	Rev-mediated nuclear export of HIV RNA	4/1829	34/10654	0.85903	1	0.907361	NUP93/XPO1/NUP210/POM121	4
R-HSA-5693537	Resolution of D-Loop Structures	4/1829	34/10654	0.85903	1	0.907361	EXO1/BRCA2/EME2/GEN1	4
R-HSA-110320	Translesion Synthesis by POLH	2/1829	19/10654	0.862396	1	0.907361	RPA2/RCHY1	2
R-HSA-190872	Transport of connexons to the plasma membrane	2/1829	19/10654	0.862396	1	0.907361	TUBB3/TUBB4A	2
R-HSA-442660	Na+/Cl- dependent neurotransmitter transporters	2/1829	19/10654	0.862396	1	0.907361	SLC6A12/SLC6A6	2
R-HSA-6804760	Regulation of TP53 Activity through Methylation	2/1829	19/10654	0.862396	1	0.907361	SMYD2/PRMT5	2
R-HSA-8851708	Signaling by FGFR2 IIIa TM	2/1829	19/10654	0.862396	1	0.907361	POLR2E/GTF2F1	2
R-HSA-8964038	LDL clearance	2/1829	19/10654	0.862396	1	0.907361	SOAT1/NPC1	2
R-HSA-983231	Factors involved in megakaryocyte development and platelet production	24/1829	168/10654	0.865926	1	0.907361	MFN2/KIF26B/KIF20B/EHD1/NFE2/DOCK9/ITPK1/RCOR1/SH2B1/TUBB3/KIF19/TUBB4A/PRKACA/EHD2/KIF3C/DOCK10/PRKAR2A/IRF2/IRF1/MICAL1/MYB/KIF13B/AK3/ABL1	24
R-HSA-1538133	G0 and Early G1	3/1829	27/10654	0.866246	1	0.907361	CCNA1/E2F4/CCNE2	3
R-HSA-5576893	Phase 2 - plateau phase	3/1829	27/10654	0.866246	1	0.907361	KCNQ1/CACNB1/CACNB4	3
R-HSA-5654716	Downstream signaling of activated FGFR4	3/1829	27/10654	0.866246	1	0.907361	PLCG1/GAB1/FGFR4	3
R-HSA-912526	Interleukin receptor SHC signaling	3/1829	27/10654	0.866246	1	0.907361	PTPN6/CSF2RB/IL2RG	3
R-HSA-2132295	MHC class II antigen presentation	17/1829	123/10654	0.86818	1	0.907361	DNM3/ARF1/ACTR1A/CTSD/CTSC/LAG3/CTSH/DYNC1LI2/TUBB3/TUBB4A/KIF3C/DYNC1I2/AP1B1/CD74/HLA-DRA/CTSB/AP1S2	17
R-HSA-168253	Host Interactions with Influenza Factors	5/1829	42/10654	0.870121	1	0.907361	ISG15/NUP93/EIF2AK2/NUP210/POM121	5
R-HSA-375280	Amine ligand-binding receptors	5/1829	42/10654	0.870121	1	0.907361	HTR7/ADRA2A/ADRB1/HRH1/ADRB2	5
R-HSA-419037	NCAM1 interactions	5/1829	42/10654	0.870121	1	0.907361	NCAM1/CACNB1/CACNB4/COL6A1/GFRA2	5
R-HSA-5693579	Homologous DNA Pairing and Strand Exchange	5/1829	42/10654	0.870121	1	0.907361	RPA2/EXO1/RHNO1/BRCA2/ATR	5
R-HSA-8939236	RUNX1 regulates transcription of genes involved in differentiation of HSCs	18/1829	130/10654	0.872007	1	0.907361	PSMA5/PSMD13/PSMA1/LMO2/MNAT1/PSMD7/PSMB3/PSMD3/PSME3/PSMC5/TCF3/PSMC4/PSMD1/ITCH/PSMD2/MYB/PSMB1/ABL1	18
R-HSA-68882	Mitotic Anaphase	29/1829	201/10654	0.873078	1	0.907361	PSMA5/LMNA/NUF2/CENPF/PSMD13/PSMA1/DYNC1LI2/PSMD7/TUBB3/PSMB3/PSMD3/PSME3/PSMC5/TUBB4A/PSMC4/PPP2R1A/CENPA/XPO1/CLASP1/DYNC1I2/PSMD1/PSMD2/CENPK/LMNB1/LEMD2/PSMB1/MAD1L1/CENPI/STAG2	29
R-HSA-195258	RHO GTPase Effectors	49/1829	327/10654	0.873426	1	0.907361	IQGAP3/NUF2/KIF14/CENPF/CTTN/MYL6/PPP1R12A/DAAM1/CALM2/CALM1/EVL/NOXO1/MAPK3/DYNC1LI2/TUBB3/DVL2/MYH10/FMNL1/BAIAP2/MYL12A/TUBB4A/CALM3/MYH14/PPP2R1A/ROCK2/CENPA/RHOQ/XPO1/CLASP1/FMNL2/DYNC1I2/WIPF1/NF2/NCF4/RAC2/MAPK11/CENPK/IQGAP2/CDC25C/DIAPH1/CYFIP2/MAD1L1/LIMK1/PTK2/RHPN1/SCAI/ABL1/NOXA1/CENPI	49
R-HSA-159230	Transport of the SLBP Dependant Mature mRNA	4/1829	35/10654	0.874165	1	0.907361	NXF1/NUP93/NUP210/POM121	4
R-HSA-8953750	Transcriptional Regulation by E2F6	4/1829	35/10654	0.874165	1	0.907361	BMI1/APAF1/RRM2/CBX3	4
R-HSA-1236977	Endosomal/Vacuolar pathway	1/1829	11/10654	0.874178	1	0.907361	LNPEP	1
R-HSA-1839122	Signaling by activated point mutants of FGFR1	1/1829	11/10654	0.874178	1	0.907361	FGFR1	1
R-HSA-193048	Androgen biosynthesis	1/1829	11/10654	0.874178	1	0.907361	SRD5A3	1
R-HSA-2022923	Dermatan sulfate biosynthesis	1/1829	11/10654	0.874178	1	0.907361	CSPG4	1
R-HSA-2468052	Establishment of Sister Chromatid Cohesion	1/1829	11/10654	0.874178	1	0.907361	STAG2	1
R-HSA-2534343	Interaction With Cumulus Cells And The Zona Pellucida	1/1829	11/10654	0.874178	1	0.907361	OVGP1	1
R-HSA-390247	Beta-oxidation of very long chain fatty acids	1/1829	11/10654	0.874178	1	0.907361	ACOX1	1
R-HSA-5661231	Metallothioneins bind metals	1/1829	11/10654	0.874178	1	0.907361	MT2A	1
R-HSA-71288	Creatine metabolism	1/1829	11/10654	0.874178	1	0.907361	SLC6A12	1
R-HSA-75072	mRNA Editing	1/1829	11/10654	0.874178	1	0.907361	ADARB1	1
R-HSA-8875555	MET activates RAP1 and RAC1	1/1829	11/10654	0.874178	1	0.907361	GAB1	1
R-HSA-8963691	Phenylalanine and tyrosine metabolism	1/1829	11/10654	0.874178	1	0.907361	IL4I1	1
R-HSA-9014325	TICAM1,TRAF6-dependent induction of TAK1 complex	1/1829	11/10654	0.874178	1	0.907361	TAB2	1
R-HSA-9645460	Alpha-protein kinase 1 signaling pathway	1/1829	11/10654	0.874178	1	0.907361	TAB2	1
R-HSA-8868773	rRNA processing in the nucleus and cytosol	28/1829	195/10654	0.875545	1	0.907361	WDR3/ISG20L2/BMS1/DDX21/PDCD11/NAT10/TRMT112/NOP2/DDX47/KRR1/DHX37/TBL3/UTP6/EXOSC5/MPHOSPH10/IMP4/EXOSC7/RRP9/RPP14/NOP14/WDR46/RPL10A/LTV1/DCAF13/EXOSC4/RCL1/NOL6/UTP14A	28
R-HSA-168927	TICAM1, RIP1-mediated IKK complex recruitment	2/1829	20/10654	0.881266	1	0.907361	UBE2N/RIPK3	2
R-HSA-381771	Synthesis, secretion, and inactivation of Glucagon-like Peptide-1 (GLP-1)	2/1829	20/10654	0.881266	1	0.907361	SPCS2/SEC11A	2
R-HSA-5654720	PI-3K cascade:FGFR4	2/1829	20/10654	0.881266	1	0.907361	GAB1/FGFR4	2
R-HSA-69186	Lagging Strand Synthesis	2/1829	20/10654	0.881266	1	0.907361	RPA2/POLD1	2
R-HSA-8876384	Listeria monocytogenes entry into host cells	2/1829	20/10654	0.881266	1	0.907361	CBL/SH3KBP1	2
R-HSA-1660661	Sphingolipid de novo biosynthesis	5/1829	43/10654	0.883121	1	0.907361	SPTLC2/ORMDL3/CERS1/PRKD2/ACER2	5
R-HSA-168325	Viral Messenger RNA Synthesis	5/1829	43/10654	0.883121	1	0.907361	NUP93/POLR2E/GTF2F1/NUP210/POM121	5
R-HSA-75893	TNF signaling	5/1829	43/10654	0.883121	1	0.907361	USP2/RNF31/CLIP3/TNFAIP3/TAB2	5
R-HSA-198933	Immunoregulatory interactions between a Lymphoid and a non-Lymphoid cell	18/1829	132/10654	0.88722	1	0.907361	CD1D/IFITM1/ITGAL/COL1A1/CD300A/CD300LB/CD300LF/CD226/ICAM1/HCST/SIGLEC6/LILRA1/LILRB4/ITGA4/SIGLEC1/CD40/ITGB2/TREM1	18
R-HSA-177243	Interactions of Rev with host cellular proteins	4/1829	36/10654	0.887875	1	0.907361	NUP93/XPO1/NUP210/POM121	4
R-HSA-390522	Striated Muscle Contraction	4/1829	36/10654	0.887875	1	0.907361	VIM/TNNT1/TPM2/TMOD1	4
R-HSA-6811434	COPI-dependent Golgi-to-ER retrograde traffic	13/1829	99/10654	0.888776	1	0.907361	ARF1/KIF26B/KIF20B/ARF3/COPZ1/TMED10/TUBB3/KIF19/TUBB4A/KIF3C/STX18/BNIP1/KIF13B	13
R-HSA-162587	HIV Life Cycle	21/1829	152/10654	0.889703	1	0.907361	VPS37B/MNAT1/FURIN/NUP93/VPS4A/NMT1/POLR2E/GTF2F1/MVB12A/ELL/ERCC2/XPO1/CXCR4/CHMP4B/NUP210/TAF9/TBP/POM121/VPS37D/CHMP5/MVB12B	21
R-HSA-8856688	Golgi-to-ER retrograde transport	18/1829	133/10654	0.894268	1	0.907361	ARF1/GALNT2/KIF26B/KIF20B/ACTR1A/ARF3/COPZ1/TMED10/DYNC1LI2/TUBB3/KIF19/TUBB4A/PAFAH1B3/KIF3C/DYNC1I2/STX18/BNIP1/KIF13B	18
R-HSA-170968	Frs2-mediated activation	1/1829	12/10654	0.8958	1	0.907361	MAPK3	1
R-HSA-176974	Unwinding of DNA	1/1829	12/10654	0.8958	1	0.907361	MCM3	1
R-HSA-1839130	Signaling by activated point mutants of FGFR3	1/1829	12/10654	0.8958	1	0.907361	FGFR3	1
R-HSA-190373	FGFR1c ligand binding and activation	1/1829	12/10654	0.8958	1	0.907361	FGFR1	1
R-HSA-2033514	FGFR3 mutant receptor activation	1/1829	12/10654	0.8958	1	0.907361	FGFR3	1
R-HSA-211979	Eicosanoids	1/1829	12/10654	0.8958	1	0.907361	TBXAS1	1
R-HSA-390666	Serotonin receptors	1/1829	12/10654	0.8958	1	0.907361	HTR7	1
R-HSA-430116	GP1b-IX-V activation signalling	1/1829	12/10654	0.8958	1	0.907361	COL1A1	1
R-HSA-5578768	Physiological factors	1/1829	12/10654	0.8958	1	0.907361	HIPK1	1
R-HSA-6803207	TP53 Regulates Transcription of Caspase Activators and Caspases	1/1829	12/10654	0.8958	1	0.907361	APAF1	1
R-HSA-6803211	TP53 Regulates Transcription of Death Receptors and Ligands	1/1829	12/10654	0.8958	1	0.907361	TNFRSF10B	1
R-HSA-8866427	VLDLR internalisation and degradation	1/1829	12/10654	0.8958	1	0.907361	NR1H3	1
R-HSA-5669034	TNFs bind their physiological receptors	3/1829	29/10654	0.896535	1	0.907361	TNFRSF9/CD70/TNFSF14	3
R-HSA-72312	rRNA processing	29/1829	205/10654	0.897012	1	0.907361	WDR3/ISG20L2/BMS1/DDX21/PDCD11/NAT10/TRMT112/NOP2/DDX47/KRR1/DHX37/TBL3/ELAC2/UTP6/EXOSC5/MPHOSPH10/IMP4/EXOSC7/RRP9/RPP14/NOP14/WDR46/RPL10A/LTV1/DCAF13/EXOSC4/RCL1/NOL6/UTP14A	29
R-HSA-196741	Cobalamin (Cbl, vitamin B12) transport and metabolism	2/1829	21/10654	0.897716	1	0.907361	MMACHC/ABCC1	2
R-HSA-379726	Mitochondrial tRNA aminoacylation	2/1829	21/10654	0.897716	1	0.907361	CARS2/MARS2	2
R-HSA-5651801	PCNA-Dependent Long Patch Base Excision Repair	2/1829	21/10654	0.897716	1	0.907361	RPA2/POLD1	2
R-HSA-5654689	PI-3K cascade:FGFR1	2/1829	21/10654	0.897716	1	0.907361	GAB1/FGFR1	2
R-HSA-376176	Signaling by ROBO receptors	31/1829	218/10654	0.897853	1	0.907361	PSMA5/ABL2/UPF2/SLIT1/PSMD13/PSMA1/EVL/RNPS1/PSMD7/PSMB3/PSMD3/PSME3/PSMC5/PRKACA/MYO9B/PSMC4/VASP/NCK2/CLASP1/CXCR4/PSMD1/GPC1/PRKAR2A/ROBO1/PSMD2/ETF1/RPL10A/PSMB1/PABPC1/LHX2/ABL1	31
R-HSA-211897	Cytochrome P450 - arranged by substrate type	8/1829	66/10654	0.899868	1	0.907361	CYP19A1/CYP1B1/CYP26B1/CYP4V2/AHR/POR/TBXAS1/RXRA	8
R-HSA-176187	Activation of ATR in response to replication stress	4/1829	37/10654	0.90026	1	0.907361	RPA2/ATR/CDC25C/MCM3	4
R-HSA-8979227	Triglyceride metabolism	4/1829	37/10654	0.90026	1	0.907361	FABP3/PRKACA/LPIN1/PNPLA4	4
R-HSA-983189	Kinesins	7/1829	59/10654	0.900622	1	0.907361	KIF26B/KIF20B/TUBB3/KIF19/TUBB4A/KIF3C/KIF13B	7
R-HSA-2428928	IRS-related events triggered by IGF1R	6/1829	52/10654	0.902446	1	0.907361	PDE3B/IRS1/FGFR3/GAB1/FGFR4/FGFR1	6
R-HSA-391251	Protein folding	13/1829	101/10654	0.904181	1	0.907361	GNG5/CCT3/GNG4/GNB5/KIFC3/TUBB3/GNG7/TUBB4A/CCT7/PFDN1/CCT6A/GNAI1/CCNE2	13
R-HSA-6807878	COPI-mediated anterograde transport	13/1829	101/10654	0.904181	1	0.907361	ARF1/COG2/ACTR1A/BET1L/ARF3/COPZ1/TMED10/DYNC1LI2/TUBB3/TUBB4A/DYNC1I2/GORASP1/YKT6	13
R-HSA-5685942	HDR through Homologous Recombination (HRR)	8/1829	67/10654	0.908623	1	0.907361	RPA2/EXO1/RHNO1/BRCA2/EME2/POLD1/GEN1/ATR	8
R-HSA-73856	RNA Polymerase II Transcription Termination	8/1829	67/10654	0.908623	1	0.907361	LSM10/PCF11/CPSF2/RNPS1/ZNF473/FYTTD1/FIP1L1/SLU7	8
R-HSA-180786	Extension of Telomeres	3/1829	30/10654	0.909236	1	0.907361	RPA2/POLD1/RUVBL1	3
R-HSA-3232142	SUMOylation of ubiquitinylation proteins	4/1829	38/10654	0.911422	1	0.907361	NUP93/NUP210/TRIM27/POM121	4
R-HSA-2428924	IGF1R signaling cascade	6/1829	53/10654	0.91195	1	0.907361	PDE3B/IRS1/FGFR3/GAB1/FGFR4/FGFR1	6
R-HSA-202427	Phosphorylation of CD3 and TCR zeta chains	2/1829	22/10654	0.912021	1	0.907361	HLA-DRA/PAG1	2
R-HSA-389977	Post-chaperonin tubulin folding pathway	2/1829	22/10654	0.912021	1	0.907361	TUBB3/TUBB4A	2
R-HSA-9033658	Blood group systems biosynthesis	2/1829	22/10654	0.912021	1	0.907361	ST3GAL4/ST3GAL6	2
R-HSA-113501	Inhibition of replication initiation of damaged DNA by RB1/E2F1	1/1829	13/10654	0.913709	1	0.907361	PPP2R1A	1
R-HSA-1483213	Synthesis of PE	1/1829	13/10654	0.913709	1	0.907361	LPIN1	1
R-HSA-179812	GRB2 events in EGFR signaling	1/1829	13/10654	0.913709	1	0.907361	HBEGF	1
R-HSA-190239	FGFR3 ligand binding and activation	1/1829	13/10654	0.913709	1	0.907361	FGFR3	1
R-HSA-190372	FGFR3c ligand binding and activation	1/1829	13/10654	0.913709	1	0.907361	FGFR3	1
R-HSA-2022857	Keratan sulfate degradation	1/1829	13/10654	0.913709	1	0.907361	GNS	1
R-HSA-2168880	Scavenging of heme from plasma	1/1829	13/10654	0.913709	1	0.907361	LRP1	1
R-HSA-432047	Passive transport by Aquaporins	1/1829	13/10654	0.913709	1	0.907361	AQP3	1
R-HSA-68884	Mitotic Telophase/Cytokinesis	1/1829	13/10654	0.913709	1	0.907361	STAG2	1
R-HSA-75035	Chk1/Chk2(Cds1) mediated inactivation of Cyclin B:Cdk1 complex	1/1829	13/10654	0.913709	1	0.907361	CDC25C	1
R-HSA-75109	Triglyceride biosynthesis	1/1829	13/10654	0.913709	1	0.907361	LPIN1	1
R-HSA-167169	HIV Transcription Elongation	5/1829	46/10654	0.915631	1	0.907361	MNAT1/POLR2E/GTF2F1/ELL/ERCC2	5
R-HSA-167200	Formation of HIV-1 elongation complex containing HIV-1 Tat	5/1829	46/10654	0.915631	1	0.907361	MNAT1/POLR2E/GTF2F1/ELL/ERCC2	5
R-HSA-167246	Tat-mediated elongation of the HIV-1 transcript	5/1829	46/10654	0.915631	1	0.907361	MNAT1/POLR2E/GTF2F1/ELL/ERCC2	5
R-HSA-8854214	TBC/RABGAPs	5/1829	46/10654	0.915631	1	0.907361	OPTN/TBC1D15/ARF6/TBC1D17/TBC1D2	5
R-HSA-204005	COPII-mediated vesicle transport	8/1829	68/10654	0.916717	1	0.907361	CTSC/TMED10/PREB/CTSZ/ANKRD28/GORASP1/COL7A1/YKT6	8
R-HSA-2467813	Separation of Sister Chromatids	26/1829	190/10654	0.919754	1	0.907361	PSMA5/NUF2/CENPF/PSMD13/PSMA1/DYNC1LI2/PSMD7/TUBB3/PSMB3/PSMD3/PSME3/PSMC5/TUBB4A/PSMC4/PPP2R1A/CENPA/XPO1/CLASP1/DYNC1I2/PSMD1/PSMD2/CENPK/PSMB1/MAD1L1/CENPI/STAG2	26
R-HSA-168271	Transport of Ribonucleoproteins into the Host Nucleus	3/1829	31/10654	0.920505	1	0.907361	NUP93/NUP210/POM121	3
R-HSA-170822	Regulation of Glucokinase by Glucokinase Regulatory Protein	3/1829	31/10654	0.920505	1	0.907361	NUP93/NUP210/POM121	3
R-HSA-399719	Trafficking of AMPA receptors	3/1829	31/10654	0.920505	1	0.907361	CAMK2G/EPB41L1/CAMK2D	3
R-HSA-399721	Glutamate binding, activation of AMPA receptors and synaptic plasticity	3/1829	31/10654	0.920505	1	0.907361	CAMK2G/EPB41L1/CAMK2D	3
R-HSA-5619107	Defective TPR may confer susceptibility towards thyroid papillary carcinoma (TPC)	3/1829	31/10654	0.920505	1	0.907361	NUP93/NUP210/POM121	3
R-HSA-2404192	Signaling by Type 1 Insulin-like Growth Factor 1 Receptor (IGF1R)	6/1829	54/10654	0.920639	1	0.907361	PDE3B/IRS1/FGFR3/GAB1/FGFR4/FGFR1	6
R-HSA-73933	Resolution of Abasic Sites (AP sites)	4/1829	39/10654	0.921456	1	0.907361	RPA2/NEIL1/POLD1/OGG1	4
R-HSA-1482801	Acyl chain remodelling of PS	2/1829	23/10654	0.924432	1	0.907361	OSBPL5/OSBPL8	2
R-HSA-166663	Initial triggering of complement	2/1829	23/10654	0.924432	1	0.907361	C1QA/CFP	2
R-HSA-167242	Abortive elongation of HIV-1 transcript in the absence of Tat	2/1829	23/10654	0.924432	1	0.907361	POLR2E/GTF2F1	2
R-HSA-2453902	The canonical retinoid cycle in rods (twilight vision)	2/1829	23/10654	0.924432	1	0.907361	DHRS9/CYP4V2	2
R-HSA-400508	Incretin synthesis, secretion, and inactivation	2/1829	23/10654	0.924432	1	0.907361	SPCS2/SEC11A	2
R-HSA-6791226	Major pathway of rRNA processing in the nucleolus and cytosol	25/1829	185/10654	0.926886	1	0.907361	WDR3/ISG20L2/BMS1/DDX21/PDCD11/DDX47/KRR1/DHX37/TBL3/UTP6/EXOSC5/MPHOSPH10/IMP4/EXOSC7/RRP9/RPP14/NOP14/WDR46/RPL10A/LTV1/DCAF13/EXOSC4/RCL1/NOL6/UTP14A	25
R-HSA-162594	Early Phase of HIV Life Cycle	1/1829	14/10654	0.928541	1	0.907361	CXCR4	1
R-HSA-166786	Creation of C4 and C2 activators	1/1829	14/10654	0.928541	1	0.907361	C1QA	1
R-HSA-169893	Prolonged ERK activation events	1/1829	14/10654	0.928541	1	0.907361	MAPK3	1
R-HSA-174411	Polymerase switching on the C-strand of the telomere	1/1829	14/10654	0.928541	1	0.907361	POLD1	1
R-HSA-177504	Retrograde neurotrophin signalling	1/1829	14/10654	0.928541	1	0.907361	DNM3	1
R-HSA-180336	SHC1 events in EGFR signaling	1/1829	14/10654	0.928541	1	0.907361	HBEGF	1
R-HSA-190322	FGFR4 ligand binding and activation	1/1829	14/10654	0.928541	1	0.907361	FGFR4	1
R-HSA-198323	AKT phosphorylates targets in the cytosol	1/1829	14/10654	0.928541	1	0.907361	AKT1	1
R-HSA-3296469	Defects in cobalamin (B12) metabolism	1/1829	14/10654	0.928541	1	0.907361	MMACHC	1
R-HSA-3371568	Attenuation phase	1/1829	14/10654	0.928541	1	0.907361	HSP90AB1	1
R-HSA-4839735	AXIN mutants destabilize the destruction complex, activating WNT signaling	1/1829	14/10654	0.928541	1	0.907361	PPP2R1A	1
R-HSA-4839744	truncated APC mutants destabilize the destruction complex	1/1829	14/10654	0.928541	1	0.907361	PPP2R1A	1
R-HSA-4839748	AMER1 mutants destabilize the destruction complex	1/1829	14/10654	0.928541	1	0.907361	PPP2R1A	1
R-HSA-5467337	APC truncation mutants have impaired AXIN binding	1/1829	14/10654	0.928541	1	0.907361	PPP2R1A	1
R-HSA-5467340	AXIN missense mutants destabilize the destruction complex	1/1829	14/10654	0.928541	1	0.907361	PPP2R1A	1
R-HSA-5467348	Truncations of AMER1 destabilize the destruction complex	1/1829	14/10654	0.928541	1	0.907361	PPP2R1A	1
R-HSA-5660526	Response to metal ions	1/1829	14/10654	0.928541	1	0.907361	MT2A	1
R-HSA-5682910	LGI-ADAM interactions	1/1829	14/10654	0.928541	1	0.907361	STX1A	1
R-HSA-69091	Polymerase switching	1/1829	14/10654	0.928541	1	0.907361	POLD1	1
R-HSA-69109	Leading Strand Synthesis	1/1829	14/10654	0.928541	1	0.907361	POLD1	1
R-HSA-72202	Transport of Mature Transcript to Cytoplasm	10/1829	84/10654	0.929306	1	0.907361	NXF1/CPSF2/RNPS1/NUP93/NXT1/NUP210/FYTTD1/FIP1L1/SLU7/POM121	10
R-HSA-69190	DNA strand elongation	3/1829	32/10654	0.93048	1	0.907361	RPA2/POLD1/MCM3	3
R-HSA-167152	Formation of HIV elongation complex in the absence of HIV Tat	5/1829	48/10654	0.932609	1	0.907361	MNAT1/POLR2E/GTF2F1/ELL/ERCC2	5
R-HSA-8878171	Transcriptional regulation by RUNX1	33/1829	239/10654	0.933779	1	0.907361	PHC2/PSMA5/BMI1/PSMD13/PSMA1/LMO2/CCND1/NFE2/ELF1/LGALS3/MNAT1/PSMD7/PSMB3/PSMD3/PSME3/PSMC5/SOCS3/CBX2/TCF3/PSMC4/PRMT1/DPY30/PSMD1/ITCH/CBX6/PSMD2/OCLN/CCND3/MYB/PSMB1/CDK6/SMARCA2/ABL1	33
R-HSA-156584	Cytosolic sulfonation of small molecules	2/1829	24/10654	0.935178	1	0.907361	BPNT1/SLC26A2	2
R-HSA-174417	Telomere C-strand (Lagging Strand) Synthesis	2/1829	24/10654	0.935178	1	0.907361	RPA2/POLD1	2
R-HSA-379716	Cytosolic tRNA aminoacylation	2/1829	24/10654	0.935178	1	0.907361	PPA1/AIMP2	2
R-HSA-452723	Transcriptional regulation of pluripotent stem cells	2/1829	24/10654	0.935178	1	0.907361	FOXP1/KLF4	2
R-HSA-418594	G alpha (i) signalling events	59/1829	406/10654	0.935961	1	0.907361	DHRS3/HSPG2/SDC3/LRP8/GNG5/GPSM2/RGS16/GNG4/AKR1C1/AKR1C3/CAMK2G/ADRA2A/C3AR1/ITPR2/PDE1B/LRP1/ADCY4/CALM2/CALM1/PLCB2/GNB5/CCL4/NMT1/GALR2/GNG7/S1PR5/PRKACA/CALM3/PPP2R1A/ADCY3/CXCR4/DHRS9/CXCR2/NMUR1/GPC1/SDC4/ITPR1/CX3CR1/CCR1/PRKAR2A/RGS12/CXCL1/CXCL10/PPP3CA/CAMK2D/CYP4V2/CAMK4/CNR1/ADCY1/GNAI1/PNOC/RGS20/SDC2/LRP12/GABBR2/LPAR1/RGS3/C5/CXCR3	59
R-HSA-5696400	Dual Incision in GG-NER	4/1829	41/10654	0.938517	1	0.907361	RPA2/DDB1/ERCC2/POLD1	4
R-HSA-180746	Nuclear import of Rev protein	3/1829	33/10654	0.939292	1	0.907361	NUP93/NUP210/POM121	3
R-HSA-180910	Vpr-mediated nuclear import of PICs	3/1829	33/10654	0.939292	1	0.907361	NUP93/NUP210/POM121	3
R-HSA-418990	Adherens junctions interactions	3/1829	33/10654	0.939292	1	0.907361	CADM1/CDH15/JUP	3
R-HSA-2032785	YAP1- and WWTR1 (TAZ)-stimulated gene expression	1/1829	15/10654	0.940824	1	0.907361	HIPK1	1
R-HSA-3772470	Negative regulation of TCF-dependent signaling by WNT ligand antagonists	1/1829	15/10654	0.940824	1	0.907361	DKK2	1
R-HSA-4839743	phosphorylation site mutants of CTNNB1 are not targeted to the proteasome by the destruction complex	1/1829	15/10654	0.940824	1	0.907361	PPP2R1A	1
R-HSA-5339716	Misspliced GSK3beta mutants stabilize beta-catenin	1/1829	15/10654	0.940824	1	0.907361	PPP2R1A	1
R-HSA-5358747	S33 mutants of beta-catenin aren't phosphorylated	1/1829	15/10654	0.940824	1	0.907361	PPP2R1A	1
R-HSA-5358749	S37 mutants of beta-catenin aren't phosphorylated	1/1829	15/10654	0.940824	1	0.907361	PPP2R1A	1
R-HSA-5358751	S45 mutants of beta-catenin aren't phosphorylated	1/1829	15/10654	0.940824	1	0.907361	PPP2R1A	1
R-HSA-5358752	T41 mutants of beta-catenin aren't phosphorylated	1/1829	15/10654	0.940824	1	0.907361	PPP2R1A	1
R-HSA-549132	Organic cation/anion/zwitterion transport	1/1829	15/10654	0.940824	1	0.907361	SLC22A15	1
R-HSA-5696397	Gap-filling DNA repair synthesis and ligation in GG-NER	2/1829	25/10654	0.944463	1	0.907361	RPA2/POLD1	2
R-HSA-6782210	Gap-filling DNA repair synthesis and ligation in TC-NER	7/1829	65/10654	0.945345	1	0.907361	RPA2/ERCC6/DDB1/MNAT1/POLR2E/ERCC2/POLD1	7
R-HSA-186712	Regulation of beta-cell development	4/1829	42/10654	0.945717	1	0.907361	NEUROG3/AKT1/RBPJ/MAML1	4
R-HSA-379724	tRNA Aminoacylation	4/1829	42/10654	0.945717	1	0.907361	PPA1/CARS2/MARS2/AIMP2	4
R-HSA-1483206	Glycerophospholipid biosynthesis	16/1829	129/10654	0.945738	1	0.907361	LPGAT1/OSBPL5/PITPNM1/PLBD1/OSBPL8/CHPT1/PCTP/MBOAT7/LPIN1/HADHA/PLD1/AGPAT1/AGPAT4/PNPLA8/SLC44A1/TAZ	16
R-HSA-71291	Metabolism of amino acids and derivatives	53/1829	372/10654	0.946792	1	0.907361	SERINC2/PSMA5/PHGDH/GLUL/KMO/DHTKD1/GOT1/PSMD13/PSMA1/ACAT1/DLAT/SLC6A12/BCAT1/TXNRD1/SDS/SLC25A15/DLST/NDUFAB1/GPT2/GOT2/NQO1/PSMD7/SLC7A5/PIPOX/PSMB3/PSMD3/PSME3/PSMC5/PSMC4/BCKDHA/IL4I1/ADI1/HAAO/SLC25A12/PSMD1/AHCY/PRODH/TXN2/PSMD2/PPM1K/MCCC2/SERINC5/RPL10A/GNMT/PSMB1/AIMP2/OGDH/DLD/GSR/TYRP1/SECISBP2/SLC44A1/SAT1	53
R-HSA-167238	Pausing and recovery of Tat-mediated HIV elongation	3/1829	34/10654	0.947059	1	0.907361	POLR2E/GTF2F1/ELL	3
R-HSA-167243	Tat-mediated HIV elongation arrest and recovery	3/1829	34/10654	0.947059	1	0.907361	POLR2E/GTF2F1/ELL	3
R-HSA-4085377	SUMOylation of SUMOylation proteins	3/1829	34/10654	0.947059	1	0.907361	NUP93/NUP210/POM121	3
R-HSA-4791275	Signaling by WNT in cancer	3/1829	34/10654	0.947059	1	0.907361	CTBP2/PPP2R1A/DKK2	3
R-HSA-5654727	Negative regulation of FGFR2 signaling	3/1829	34/10654	0.947059	1	0.907361	CBL/MAPK3/PPP2R1A	3
R-HSA-72187	mRNA 3'-end processing	6/1829	58/10654	0.948316	1	0.907361	PCF11/CPSF2/RNPS1/FYTTD1/FIP1L1/SLU7	6
R-HSA-5654738	Signaling by FGFR2	8/1829	73/10654	0.948555	1	0.907361	HNRNPF/CBL/MAPK3/POLR2E/GTF2F1/PPP2R1A/PLCG1/GAB1	8
R-HSA-6782135	Dual incision in TC-NER	7/1829	66/10654	0.950741	1	0.907361	RPA2/ERCC6/DDB1/MNAT1/POLR2E/ERCC2/POLD1	7
R-HSA-1362300	Transcription of E2F targets under negative control by p107 (RBL1) and p130 (RBL2) in complex with HDAC1	1/1829	16/10654	0.950998	1	0.907361	E2F4	1
R-HSA-159418	Recycling of bile acids and salts	1/1829	16/10654	0.950998	1	0.907361	RXRA	1
R-HSA-190242	FGFR1 ligand binding and activation	1/1829	16/10654	0.950998	1	0.907361	FGFR1	1
R-HSA-5684264	MAP3K8 (TPL2)-dependent MAPK1/3 activation	1/1829	16/10654	0.950998	1	0.907361	CUL1	1
R-HSA-5655253	Signaling by FGFR2 in disease	4/1829	43/10654	0.952137	1	0.907361	POLR2E/GTF2F1/PLCG1/GAB1	4
R-HSA-110373	Resolution of AP sites via the multiple-nucleotide patch replacement pathway	2/1829	26/10654	0.952473	1	0.907361	RPA2/POLD1	2
R-HSA-5223345	Miscellaneous transport and binding events	2/1829	26/10654	0.952473	1	0.907361	ADD3/LRRC8A	2
R-HSA-5693554	Resolution of D-loop Structures through Synthesis-Dependent Strand Annealing (SDSA)	2/1829	26/10654	0.952473	1	0.907361	EXO1/BRCA2	2
R-HSA-606279	Deposition of new CENPA-containing nucleosomes at the centromere	8/1829	74/10654	0.95344	1	0.907361	RSF1/MIS18BP1/CENPA/HJURP/RUVBL1/SMARCA5/CENPK/CENPI	8
R-HSA-774815	Nucleosome assembly	8/1829	74/10654	0.95344	1	0.907361	RSF1/MIS18BP1/CENPA/HJURP/RUVBL1/SMARCA5/CENPK/CENPI	8
R-HSA-3301854	Nuclear Pore Complex (NPC) Disassembly	3/1829	35/10654	0.953893	1	0.907361	NUP93/NUP210/POM121	3
R-HSA-141424	Amplification of signal from the kinetochores	11/1829	96/10654	0.954158	1	0.907361	NUF2/CENPF/DYNC1LI2/PPP2R1A/CENPA/XPO1/CLASP1/DYNC1I2/CENPK/MAD1L1/CENPI	11
R-HSA-141444	Amplification of signal from unattached kinetochores via a MAD2 inhibitory signal	11/1829	96/10654	0.954158	1	0.907361	NUF2/CENPF/DYNC1LI2/PPP2R1A/CENPA/XPO1/CLASP1/DYNC1I2/CENPK/MAD1L1/CENPI	11
R-HSA-68886	M Phase	56/1829	395/10654	0.955584	1	0.907361	PSMA5/LMNA/NUF2/BLZF1/CENPF/SDCCAG8/ACTR1A/PSMD13/PSMA1/NUMA1/CENPJ/CCP110/MAPK3/NUP93/DYNC1LI2/PSMD7/TUBB3/CTDNEP1/PSMB3/PSMD3/PSME3/PSMC5/TUBB4A/PRKACA/HAUS8/PSMC4/PPP2R1A/LPIN1/CENPA/XPO1/ALMS1/CLASP1/DYNC1I2/PSMD1/PCNT/NUP210/GORASP1/CEP70/SMC4/PSMD2/NCAPG/CEP135/PLK4/CENPK/LMNB1/LEMD2/FBXO5/FGFR1OP/PSMB1/MAD1L1/POM121/CNTRL/PHF8/CENPI/STAG2/HAUS7	56
R-HSA-159236	Transport of Mature mRNA derived from an Intron-Containing Transcript	8/1829	75/10654	0.957906	1	0.907361	NXF1/RNPS1/NUP93/NXT1/NUP210/FYTTD1/SLU7/POM121	8
R-HSA-196757	Metabolism of folate and pterines	1/1829	17/10654	0.959423	1	0.907361	SHMT2	1
R-HSA-5083625	Defective GALNT3 causes familial hyperphosphatemic tumoral calcinosis (HFTC)	1/1829	17/10654	0.959423	1	0.907361	MUC1	1
R-HSA-5083636	Defective GALNT12 causes colorectal cancer 1 (CRCS1)	1/1829	17/10654	0.959423	1	0.907361	MUC1	1
R-HSA-9022699	MECP2 regulates neuronal receptors and channels	1/1829	17/10654	0.959423	1	0.907361	GPRIN1	1
R-HSA-167287	HIV elongation arrest and recovery	3/1829	36/10654	0.959894	1	0.907361	POLR2E/GTF2F1/ELL	3
R-HSA-167290	Pausing and recovery of HIV elongation	3/1829	36/10654	0.959894	1	0.907361	POLR2E/GTF2F1/ELL	3
R-HSA-190861	Gap junction assembly	3/1829	36/10654	0.959894	1	0.907361	TUBB3/GJD3/TUBB4A	3
R-HSA-191859	snRNP Assembly	5/1829	53/10654	0.962453	1	0.907361	WDR77/PRMT5/NUP93/NUP210/POM121	5
R-HSA-194441	Metabolism of non-coding RNA	5/1829	53/10654	0.962453	1	0.907361	WDR77/PRMT5/NUP93/NUP210/POM121	5
R-HSA-112382	Formation of RNA Pol II elongation complex	6/1829	61/10654	0.963011	1	0.907361	MNAT1/WDR61/POLR2E/GTF2F1/ELL/ERCC2	6
R-HSA-75955	RNA Polymerase II Transcription Elongation	6/1829	61/10654	0.963011	1	0.907361	MNAT1/WDR61/POLR2E/GTF2F1/ELL/ERCC2	6
R-HSA-1482788	Acyl chain remodelling of PC	2/1829	28/10654	0.965303	1	0.907361	PLBD1/PNPLA8	2
R-HSA-3295583	TRP channels	2/1829	28/10654	0.965303	1	0.907361	RIPK3/TRPM2	2
R-HSA-3108214	SUMOylation of DNA damage response and repair proteins	8/1829	77/10654	0.965703	1	0.907361	PHC2/BMI1/NUP93/CBX2/SP100/NUP210/POM121/STAG2	8
R-HSA-5083632	Defective C1GALT1C1 causes Tn polyagglutination syndrome (TNPS)	1/1829	18/10654	0.9664	1	0.907361	MUC1	1
R-HSA-5654221	Phospholipase C-mediated cascade; FGFR2	1/1829	18/10654	0.9664	1	0.907361	PLCG1	1
R-HSA-5654704	SHC-mediated cascade:FGFR3	1/1829	18/10654	0.9664	1	0.907361	FGFR3	1
R-HSA-6781823	Formation of TC-NER Pre-Incision Complex	5/1829	54/10654	0.966719	1	0.907361	ERCC6/DDB1/MNAT1/POLR2E/ERCC2	5
R-HSA-9018519	Estrogen-dependent gene expression	18/1829	150/10654	0.968711	1	0.907361	POU2F1/CTSD/CCND1/PGR/FOS/TLE3/DDX5/BCL2/POLR2E/GTF2F1/PRMT1/ATF2/ZNF217/NRIP1/HSP90AB1/MYB/TBP/STAG2	18
R-HSA-163125	Post-translational modification: synthesis of GPI-anchored proteins	10/1829	93/10654	0.969219	1	0.907361	CD52/PIGV/PIGM/SPRN/CPM/PIGB/RTN4RL1/CNTN4/MDGA1/CD109	10
R-HSA-420029	Tight junction interactions	2/1829	29/10654	0.970397	1	0.907361	CLDN12/CLDN23	2
R-HSA-5601884	PIWI-interacting RNA (piRNA) biogenesis	2/1829	29/10654	0.970397	1	0.907361	TDRKH/POLR2E	2
R-HSA-201681	TCF dependent signaling in response to WNT	30/1829	233/10654	0.971013	1	0.907361	CTNNBIP1/RUNX3/PSMA5/FRAT1/FRAT2/PSMD13/PSMA1/BCL9L/CCDC88C/AKT1/TLE3/PSMD7/DVL2/PSMB3/PSMD3/PSME3/PSMC5/PSMC4/PPP2R1A/XPO1/PSMD1/RUVBL1/PSMD2/DKK2/TCF7/PSMB1/SOX7/PIP5K1B/TLE4/TLE1	30
R-HSA-3214841	PKMTs methylate histone lysines	7/1829	71/10654	0.97119	1	0.907361	SMYD2/SMYD3/NFKB2/ATF7IP/SETDB2/DPY30/SETD7	7
R-HSA-977606	Regulation of Complement cascade	4/1829	47/10654	0.971424	1	0.907361	C1QA/C3AR1/C5/CFP	4
R-HSA-6781827	Transcription-Coupled Nucleotide Excision Repair (TC-NER)	8/1829	79/10654	0.972169	1	0.907361	RPA2/ERCC6/DDB1/MNAT1/POLR2E/ELL/ERCC2/POLD1	8
R-HSA-1362277	Transcription of E2F targets under negative control by DREAM complex	1/1829	19/10654	0.972178	1	0.907361	E2F4	1
R-HSA-1482925	Acyl chain remodelling of PG	1/1829	19/10654	0.972178	1	0.907361	LPGAT1	1
R-HSA-176407	Conversion from APC/C:Cdc20 to APC/C:Cdh1 in late anaphase	1/1829	19/10654	0.972178	1	0.907361	CDC14A	1
R-HSA-202430	Translocation of ZAP-70 to Immunological synapse	1/1829	19/10654	0.972178	1	0.907361	HLA-DRA	1
R-HSA-140877	Formation of Fibrin Clot (Clotting Cascade)	3/1829	39/10654	0.973787	1	0.907361	F3/C1QBP/THBD	3
R-HSA-421270	Cell-cell junction organization	6/1829	64/10654	0.973793	1	0.907361	CADM1/CDH15/JUP/SDK1/CLDN12/CLDN23	6
R-HSA-1482839	Acyl chain remodelling of PE	2/1829	30/10654	0.974765	1	0.907361	PLBD1/PNPLA8	2
R-HSA-5654696	Downstream signaling of activated FGFR2	2/1829	30/10654	0.974765	1	0.907361	PLCG1/GAB1	2
R-HSA-8866652	Synthesis of active ubiquitin: roles of E1 and E2 enzymes	2/1829	30/10654	0.974765	1	0.907361	UBE2Q2/UBE2W	2
R-HSA-2559583	Cellular Senescence	24/1829	195/10654	0.975924	1	0.907361	RPS6KA1/PHC2/CDKN2C/MAPKAPK2/BMI1/ETS1/CCNA1/FOS/MAPK3/MAP2K3/MAP2K6/CBX2/MAP4K4/CEBPB/ETS2/HIRA/CBX6/MAPK11/TNIK/IGFBP7/LMNB1/CDK6/CCNE2/RPS6KA3	24
R-HSA-2559580	Oxidative Stress Induced Senescence	14/1829	125/10654	0.976267	1	0.907361	PHC2/CDKN2C/MAPKAPK2/BMI1/FOS/MAPK3/MAP2K3/MAP2K6/CBX2/MAP4K4/CBX6/MAPK11/TNIK/CDK6	14
R-HSA-167172	Transcription of the HIV genome	7/1829	73/10654	0.976922	1	0.907361	MNAT1/POLR2E/GTF2F1/ELL/ERCC2/TAF9/TBP	7
R-HSA-5654706	FRS-mediated FGFR3 signaling	1/1829	20/10654	0.976963	1	0.907361	FGFR3	1
R-HSA-5654719	SHC-mediated cascade:FGFR4	1/1829	20/10654	0.976963	1	0.907361	FGFR4	1
R-HSA-199977	ER to Golgi Anterograde Transport	18/1829	154/10654	0.977217	1	0.907361	ARF1/COG2/ACTR1A/BET1L/CTSC/ARF3/COPZ1/TMED10/DYNC1LI2/TUBB3/TUBB4A/PREB/DYNC1I2/CTSZ/ANKRD28/GORASP1/COL7A1/YKT6	18
R-HSA-1483166	Synthesis of PA	3/1829	40/10654	0.977301	1	0.907361	PLD1/AGPAT1/AGPAT4	3
R-HSA-2500257	Resolution of Sister Chromatid Cohesion	14/1829	126/10654	0.978276	1	0.907361	NUF2/CENPF/DYNC1LI2/TUBB3/TUBB4A/PPP2R1A/CENPA/XPO1/CLASP1/DYNC1I2/CENPK/MAD1L1/CENPI/STAG2	14
R-HSA-445095	Interaction between L1 and Ankyrins	2/1829	31/10654	0.978507	1	0.907361	NRCAM/KCNQ3	2
R-HSA-212165	Epigenetic regulation of gene expression	17/1829	149/10654	0.98082	1	0.907361	MTF2/ERCC6/DDX21/RRP8/MNAT1/MYBBP1A/POLR2E/ERCC2/POLR1B/TET2/SMARCA5/JARID2/PHF1/POLR1C/TBP/TWISTNB/CBX3	17
R-HSA-189200	Cellular hexose transport	1/1829	21/10654	0.980925	1	0.907361	SLC45A3	1
R-HSA-210745	Regulation of gene expression in beta cells	1/1829	21/10654	0.980925	1	0.907361	AKT1	1
R-HSA-5654688	SHC-mediated cascade:FGFR1	1/1829	21/10654	0.980925	1	0.907361	FGFR1	1
R-HSA-9010553	Regulation of expression of SLITs and ROBOs	20/1829	171/10654	0.981943	1	0.907361	PSMA5/UPF2/SLIT1/PSMD13/PSMA1/RNPS1/PSMD7/PSMB3/PSMD3/PSME3/PSMC5/PSMC4/PSMD1/ROBO1/PSMD2/ETF1/RPL10A/PSMB1/PABPC1/LHX2	20
R-HSA-72662	Activation of the mRNA upon binding of the cap-binding complex and eIFs, and subsequent binding to 43S	5/1829	59/10654	0.982086	1	0.907361	EIF3I/EIF3M/EIF3K/EIF4EBP1/PABPC1	5
R-HSA-8866654	E3 ubiquitin ligases ubiquitinate target proteins	5/1829	59/10654	0.982086	1	0.907361	UBE2N/WDR61/RNF144A/RNF181/TMEM129	5
R-HSA-5250924	B-WICH complex positively regulates rRNA expression	9/1829	91/10654	0.982395	1	0.907361	ERCC6/DDX21/MYBBP1A/POLR2E/POLR1B/SMARCA5/POLR1C/TBP/TWISTNB	9
R-HSA-73772	RNA Polymerase I Promoter Escape	9/1829	91/10654	0.982395	1	0.907361	MNAT1/RRN3/POLR2E/ERCC2/POLR1B/POLR1C/TBP/TWISTNB/CBX3	9
R-HSA-5696399	Global Genome Nucleotide Excision Repair (GG-NER)	8/1829	84/10654	0.983764	1	0.907361	RPA2/PIAS3/DDB1/UBE2N/MNAT1/ERCC2/POLD1/RUVBL1	8
R-HSA-674695	RNA Polymerase II Pre-transcription Events	8/1829	84/10654	0.983764	1	0.907361	MNAT1/WDR61/POLR2E/GTF2F1/ELL/ERCC2/TAF9/TBP	8
R-HSA-113510	E2F mediated regulation of DNA replication	1/1829	22/10654	0.984206	1	0.907361	PPP2R1A	1
R-HSA-140837	Intrinsic Pathway of Fibrin Clot Formation	1/1829	22/10654	0.984206	1	0.907361	C1QBP	1
R-HSA-140875	Common Pathway of Fibrin Clot Formation	1/1829	22/10654	0.984206	1	0.907361	THBD	1
R-HSA-5654712	FRS-mediated FGFR4 signaling	1/1829	22/10654	0.984206	1	0.907361	FGFR4	1
R-HSA-1839126	FGFR2 mutant receptor activation	2/1829	33/10654	0.984446	1	0.907361	POLR2E/GTF2F1	2
R-HSA-68962	Activation of the pre-replicative complex	2/1829	33/10654	0.984446	1	0.907361	RPA2/MCM3	2
R-HSA-211859	Biological oxidations	27/1829	222/10654	0.984768	1	0.907361	GSTM2/GSTM3/BPNT1/EPHX1/TRMT112/ACY3/MGST1/ALDH2/CYP19A1/CES1/CYP1B1/CYP26B1/ACSS1/AHCY/ACSS2/GGT1/CYP4V2/SLC26A2/TPMT/HSP90AB1/AHR/POR/TBXAS1/GSTK1/OPLAH/PTGS1/RXRA	27
R-HSA-156580	Phase II - Conjugation of compounds	11/1829	109/10654	0.986719	1	0.907361	GSTM2/GSTM3/BPNT1/TRMT112/MGST1/AHCY/GGT1/SLC26A2/TPMT/GSTK1/OPLAH	11
R-HSA-5654693	FRS-mediated FGFR1 signaling	1/1829	23/10654	0.986923	1	0.907361	FGFR1	1
R-HSA-5654695	PI-3K cascade:FGFR2	1/1829	23/10654	0.986923	1	0.907361	GAB1	1
R-HSA-69481	G2/M Checkpoints	19/1829	168/10654	0.987066	1	0.907361	RPA2/PSMA5/EXO1/PSMD13/PSMA1/RHNO1/UBE2N/PSMD7/PSMB3/PSMD3/PSME3/PSMC5/PSMC4/PSMD1/ATR/PSMD2/CDC25C/MCM3/PSMB1	19
R-HSA-73854	RNA Polymerase I Promoter Clearance	11/1829	110/10654	0.987996	1	0.907361	ERCC6/MNAT1/RRN3/MAPK3/POLR2E/ERCC2/POLR1B/POLR1C/TBP/TWISTNB/CBX3	11
R-HSA-8852135	Protein ubiquitination	7/1829	79/10654	0.988404	1	0.907361	UBE2N/UBE2Q2/WDR61/RNF144A/RNF181/TMEM129/UBE2W	7
R-HSA-373080	Class B/2 (Secretin family receptors)	9/1829	95/10654	0.988523	1	0.907361	GNG5/GNG4/GNB5/GNG7/GIPR/FZD7/WNT7B/VIPR1/PTCH1	9
R-HSA-4551638	SUMOylation of chromatin organization proteins	6/1829	71/10654	0.988676	1	0.907361	PHC2/BMI1/NUP93/CBX2/NUP210/POM121	6
R-HSA-5696398	Nucleotide Excision Repair	11/1829	111/10654	0.989158	1	0.907361	RPA2/PIAS3/ERCC6/DDB1/UBE2N/MNAT1/POLR2E/ELL/ERCC2/POLD1/RUVBL1	11
R-HSA-203927	MicroRNA (miRNA) biogenesis	1/1829	24/10654	0.989173	1	0.907361	POLR2E	1
R-HSA-68875	Mitotic Prophase	15/1829	142/10654	0.990124	1	0.907361	LMNA/BLZF1/NUMA1/MAPK3/NUP93/CTDNEP1/PPP2R1A/LPIN1/NUP210/GORASP1/SMC4/LMNB1/LEMD2/POM121/PHF8	15
R-HSA-69618	Mitotic Spindle Checkpoint	11/1829	112/10654	0.990215	1	0.907361	NUF2/CENPF/DYNC1LI2/PPP2R1A/CENPA/XPO1/CLASP1/DYNC1I2/CENPK/MAD1L1/CENPI	11
R-HSA-73864	RNA Polymerase I Transcription	11/1829	112/10654	0.990215	1	0.907361	ERCC6/MNAT1/RRN3/MAPK3/POLR2E/ERCC2/POLR1B/POLR1C/TBP/TWISTNB/CBX3	11
R-HSA-211981	Xenobiotics	1/1829	25/10654	0.991036	1	0.907361	AHR	1
R-HSA-983170	Antigen Presentation: Folding, assembly and peptide loading of class I MHC	1/1829	25/10654	0.991036	1	0.907361	CALR	1
R-HSA-5250913	Positive epigenetic regulation of rRNA expression	10/1829	106/10654	0.991856	1	0.907361	ERCC6/DDX21/MYBBP1A/POLR2E/POLR1B/SMARCA5/POLR1C/TBP/TWISTNB/CBX3	10
R-HSA-190828	Gap junction trafficking	3/1829	47/10654	0.991921	1	0.907361	TUBB3/GJD3/TUBB4A	3
R-HSA-5696394	DNA Damage Recognition in GG-NER	2/1829	38/10654	0.993152	1	0.907361	DDB1/RUVBL1	2
R-HSA-166658	Complement cascade	4/1829	58/10654	0.993641	1	0.907361	C1QA/C3AR1/C5/CFP	4
R-HSA-72649	Translation initiation complex formation	4/1829	58/10654	0.993641	1	0.907361	EIF3I/EIF3M/EIF3K/PABPC1	4
R-HSA-5693567	HDR through Homologous Recombination (HRR) or Single Strand Annealing (SSA)	13/1829	132/10654	0.993925	1	0.907361	RPA2/EXO1/RHNO1/UBE2N/BRCA2/CCNA1/EME2/SIRT6/POLD1/GEN1/ATR/RNF4/ABL1	13
R-HSA-157858	Gap junction trafficking and regulation	3/1829	49/10654	0.994029	1	0.907361	TUBB3/GJD3/TUBB4A	3
R-HSA-73886	Chromosome Maintenance	10/1829	110/10654	0.994731	1	0.907361	RPA2/RSF1/MIS18BP1/POLD1/CENPA/HJURP/RUVBL1/SMARCA5/CENPK/CENPI	10
R-HSA-3214842	HDMs demethylate histones	3/1829	50/10654	0.994873	1	0.907361	ARID5B/KDM2A/PHF8	3
R-HSA-375276	Peptide ligand-binding receptors	22/1829	201/10654	0.995063	1	0.907361	ECE1/AVPR1B/C3AR1/NMB/CCL2/CCL4/GALR2/CXCR4/CXCR2/NMUR1/NTSR1/GHRL/CX3CR1/CCR1/CXCL1/CXCL10/RXFP1/NLN/PNOC/C5/CXCR3/AVPR2	22
R-HSA-373076	Class A/1 (Rhodopsin-like receptors)	41/1829	335/10654	0.995311	1	0.907361	ECE1/PTAFR/AVPR1B/HTR7/ADRA2A/ADRB1/P2RY2/P2RY6/C3AR1/LTB4R2/LTB4R/PTGER2/GPR65/GPR68/NMB/CCL2/CCL4/GALR2/TBXA2R/S1PR5/PTGIR/CXCR4/CXCR2/NMUR1/GPR35/NTSR1/GHRL/HRH1/CX3CR1/CCR1/CXCL1/CXCL10/RXFP1/NLN/ADRB2/CNR1/PNOC/LPAR1/C5/CXCR3/AVPR2	41
R-HSA-72695	Formation of the ternary complex, and subsequently, the 43S complex	3/1829	51/10654	0.9956	1	0.907361	EIF3I/EIF3M/EIF3K	3
R-HSA-1221632	Meiotic synapsis	6/1829	79/10654	0.995879	1	0.907361	LMNA/REC8/SYCP2/ATR/LMNB1/STAG2	6
R-HSA-72165	mRNA Splicing - Minor Pathway	3/1829	52/10654	0.996226	1	0.907361	POLR2E/GTF2F1/SF3B5	3
R-HSA-1461957	Beta defensins	2/1829	42/10654	0.996485	1	0.907361	TLR2/DEFB1	2
R-HSA-5693538	Homology Directed Repair	13/1829	138/10654	0.996716	1	0.907361	RPA2/EXO1/RHNO1/UBE2N/BRCA2/CCNA1/EME2/SIRT6/POLD1/GEN1/ATR/RNF4/ABL1	13
R-HSA-5693607	Processing of DNA double-strand break ends	8/1829	98/10654	0.996786	1	0.907361	RPA2/EXO1/RHNO1/UBE2N/CCNA1/SIRT6/ATR/RNF4	8
R-HSA-9616222	Transcriptional regulation of granulopoiesis	7/1829	90/10654	0.99696	1	0.907361	CSF3R/GFI1/KLF5/CEBPA/CEBPB/MYB/RXRA	7
R-HSA-201722	Formation of the beta-catenin:TCF transactivating complex	7/1829	91/10654	0.99732	1	0.907361	RUNX3/BCL9L/TLE3/RUVBL1/TCF7/TLE4/TLE1	7
R-HSA-977225	Amyloid fiber formation	9/1829	109/10654	0.997666	1	0.907361	HSPG2/APH1A/TSPAN14/SORL1/ADAM10/MFGE8/FURIN/TGFBI/GSN	9
R-HSA-2559582	Senescence-Associated Secretory Phenotype (SASP)	9/1829	110/10654	0.997928	1	0.907361	RPS6KA1/CDKN2C/CCNA1/FOS/MAPK3/CEBPB/IGFBP7/CDK6/RPS6KA3	9
R-HSA-5250941	Negative epigenetic regulation of rRNA expression	9/1829	110/10654	0.997928	1	0.907361	RRP8/MNAT1/POLR2E/ERCC2/POLR1B/SMARCA5/POLR1C/TBP/TWISTNB	9
R-HSA-5693532	DNA Double-Strand Break Repair	16/1829	166/10654	0.997989	1	0.907361	RPA2/EXO1/APBB1/RHNO1/UBE2N/BRCA2/CCNA1/EME2/SIRT6/PPP5C/POLD1/GEN1/ATR/RNF4/SMARCA5/ABL1	16
R-HSA-5693565	Recruitment and ATM-mediated phosphorylation of repair and signaling proteins at DNA double strand breaks	5/1829	76/10654	0.99815	1	0.907361	APBB1/UBE2N/PPP5C/SMARCA5/ABL1	5
R-HSA-5693606	DNA Double Strand Break Response	5/1829	77/10654	0.998391	1	0.907361	APBB1/UBE2N/PPP5C/SMARCA5/ABL1	5
R-HSA-72702	Ribosomal scanning and start codon recognition	3/1829	58/10654	0.998517	1	0.907361	EIF3I/EIF3M/EIF3K	3
R-HSA-3247509	Chromatin modifying enzymes	30/1829	274/10654	0.998624	1	0.907361	WDR77/SMYD2/SMYD3/ARID5B/NFKB2/KDM2A/CCND1/ATF7IP/NCOR2/SETDB2/PRMT5/ARID4A/RCOR1/KAT8/ELP5/GPS2/PRMT1/SUPT7L/DPY30/ATF2/ING5/TADA3/RUVBL1/SETD7/TAF9/BRPF3/SMARCA2/TBL1X/PHF8/MORF4L2	30
R-HSA-4839726	Chromatin organization	30/1829	274/10654	0.998624	1	0.907361	WDR77/SMYD2/SMYD3/ARID5B/NFKB2/KDM2A/CCND1/ATF7IP/NCOR2/SETDB2/PRMT5/ARID4A/RCOR1/KAT8/ELP5/GPS2/PRMT1/SUPT7L/DPY30/ATF2/ING5/TADA3/RUVBL1/SETD7/TAF9/BRPF3/SMARCA2/TBL1X/PHF8/MORF4L2	30
R-HSA-3214858	RMTs methylate histone arginines	5/1829	79/10654	0.998787	1	0.907361	WDR77/CCND1/PRMT5/PRMT1/SMARCA2	5
R-HSA-73894	DNA Repair	38/1829	334/10654	0.998905	1	0.907361	ISG15/MAD2L2/RPA2/USP1/PIAS3/EXO1/ERCC6/APBB1/DDB1/RHNO1/UBE2N/BRCA2/CCNA1/MNAT1/NEIL1/EME2/USP10/FANCA/TRIM25/POLI/POLR2E/SIRT6/ELL/ERCC2/PPP5C/POLD1/GEN1/FANCL/ASCC2/OGG1/WDR48/RUVBL1/ATR/RNF4/RCHY1/SMARCA5/FANCE/ABL1	38
R-HSA-427413	NoRC negatively regulates rRNA expression	8/1829	107/10654	0.998944	1	0.907361	MNAT1/POLR2E/ERCC2/POLR1B/SMARCA5/POLR1C/TBP/TWISTNB	8
R-HSA-69620	Cell Cycle Checkpoints	32/1829	293/10654	0.999059	1	0.907361	RPA2/PSMA5/NUF2/CENPF/EXO1/PSMD13/PSMA1/RHNO1/UBE2N/CCNA1/DYNC1LI2/PSMD7/PSMB3/PSMD3/PSME3/PSMC5/PSMC4/PPP2R1A/CENPA/XPO1/CLASP1/DYNC1I2/PSMD1/ATR/PSMD2/CENPK/CDC25C/MCM3/PSMB1/MAD1L1/CCNE2/CENPI	32
R-HSA-5689901	Metalloprotease DUBs	1/1829	37/10654	0.999071	1	0.907361	NLRP3	1
R-HSA-1912422	Pre-NOTCH Expression and Processing	8/1829	109/10654	0.999181	1	0.907361	CCND1/ST3GAL4/FURIN/SIRT6/ST3GAL6/RBPJ/MAML1/LFNG	8
R-HSA-420499	Class C/3 (Metabotropic glutamate/pheromone receptors)	1/1829	38/10654	0.999231	1	0.907361	GABBR2	1
R-HSA-1461973	Defensins	2/1829	52/10654	0.999356	1	0.907361	TLR2/DEFB1	2
R-HSA-5625740	RHO GTPases activate PKNs	6/1829	95/10654	0.999521	1	0.907361	MYL6/PPP1R12A/MYH10/MYL12A/MYH14/CDC25C	6
R-HSA-69473	G2/M DNA damage checkpoint	6/1829	95/10654	0.999521	1	0.907361	RPA2/EXO1/RHNO1/UBE2N/ATR/CDC25C	6
R-HSA-1474165	Reproduction	11/1829	144/10654	0.999738	1	0.907361	RPA2/OVGP1/LMNA/HVCN1/BRCA2/REC8/IZUMO4/SYCP2/ATR/LMNB1/STAG2	11
R-HSA-1500620	Meiosis	8/1829	118/10654	0.999746	1	0.907361	RPA2/LMNA/BRCA2/REC8/SYCP2/ATR/LMNB1/STAG2	8
R-HSA-2559586	DNA Damage/Telomere Stress Induced Senescence	4/1829	80/10654	0.999757	1	0.907361	CCNA1/HIRA/LMNB1/CCNE2	4
R-HSA-3214815	HDACs deacetylate histones	5/1829	94/10654	0.999863	1	0.907361	NCOR2/ARID4A/RCOR1/GPS2/TBL1X	5
R-HSA-110328	Recognition and association of DNA glycosylase with site containing an affected pyrimidine	2/1829	61/10654	0.999864	1	0.907361	NEIL1/OGG1	2
R-HSA-110329	Cleavage of the damaged pyrimidine	2/1829	61/10654	0.999864	1	0.907361	NEIL1/OGG1	2
R-HSA-73928	Depyrimidination	2/1829	61/10654	0.999864	1	0.907361	NEIL1/OGG1	2
R-HSA-212300	PRC2 methylates histones and DNA	3/1829	73/10654	0.999867	1	0.907361	MTF2/JARID2/PHF1	3
R-HSA-3214847	HATs acetylate histones	10/1829	142/10654	0.999886	1	0.907361	KAT8/ELP5/SUPT7L/ATF2/ING5/TADA3/RUVBL1/TAF9/BRPF3/MORF4L2	10
R-HSA-927802	Nonsense-Mediated Decay (NMD)	7/1829	115/10654	0.999891	1	0.907361	SMG5/UPF2/RNPS1/PPP2R1A/ETF1/RPL10A/PABPC1	7
R-HSA-975957	Nonsense Mediated Decay (NMD) enhanced by the Exon Junction Complex (EJC)	7/1829	115/10654	0.999891	1	0.907361	SMG5/UPF2/RNPS1/PPP2R1A/ETF1/RPL10A/PABPC1	7
R-HSA-73929	Base-Excision Repair, AP Site Formation	2/1829	63/10654	0.999904	1	0.907361	NEIL1/OGG1	2
R-HSA-6803157	Antimicrobial peptides	5/1829	97/10654	0.999913	1	0.907361	GNLY/SLC11A1/CAMP/TLR2/DEFB1	5
R-HSA-2408522	Selenoamino acid metabolism	7/1829	118/10654	0.999928	1	0.907361	TXNRD1/AHCY/RPL10A/GNMT/AIMP2/GSR/SECISBP2	7
R-HSA-168254	Influenza Infection	11/1829	155/10654	0.999933	1	0.907361	ISG15/IPO5/NUP93/POLR2E/GTF2F1/CALR/EIF2AK2/XPO1/NUP210/RPL10A/POM121	11
R-HSA-72613	Eukaryotic Translation Initiation	7/1829	119/10654	0.999938	1	0.907361	EIF3I/EIF3M/EIF3K/EIF2B5/RPL10A/EIF4EBP1/PABPC1	7
R-HSA-72737	Cap-dependent Translation Initiation	7/1829	119/10654	0.999938	1	0.907361	EIF3I/EIF3M/EIF3K/EIF2B5/RPL10A/EIF4EBP1/PABPC1	7
R-HSA-6809371	Formation of the cornified envelope	8/1829	129/10654	0.999942	1	0.907361	KRT7/TGM5/FURIN/PCSK6/PPL/KRT10/JUP/PKP4	8
R-HSA-72163	mRNA Splicing - Major Pathway	14/1829	183/10654	0.999949	1	0.907361	HNRNPU/HNRNPF/PCF11/CPSF2/RNPS1/DDX5/POLR2E/GTF2F1/USP39/PPIL3/FIP1L1/SLU7/SF3B5/PUF60	14
R-HSA-500792	GPCR ligand binding	51/1829	468/10654	0.999959	1	0.907361	ECE1/PTAFR/GNG5/AVPR1B/GNG4/HTR7/ADRA2A/ADRB1/P2RY2/P2RY6/C3AR1/LTB4R2/LTB4R/PTGER2/GPR65/GPR68/GNB5/NMB/CCL2/CCL4/GALR2/GNG7/TBXA2R/S1PR5/GIPR/PTGIR/CXCR4/FZD7/CXCR2/NMUR1/GPR35/NTSR1/WNT7B/GHRL/HRH1/CX3CR1/VIPR1/CCR1/CXCL1/CXCL10/RXFP1/NLN/ADRB2/CNR1/PNOC/PTCH1/GABBR2/LPAR1/C5/CXCR3/AVPR2	51
R-HSA-427359	SIRT1 negatively regulates rRNA expression	2/1829	68/10654	0.99996	1	0.907361	RRP8/TBP	2
R-HSA-73884	Base Excision Repair	4/1829	92/10654	0.999963	1	0.907361	RPA2/NEIL1/POLD1/OGG1	4
R-HSA-1912408	Pre-NOTCH Transcription and Translation	4/1829	93/10654	0.999968	1	0.907361	CCND1/SIRT6/RBPJ/MAML1	4
R-HSA-157579	Telomere Maintenance	3/1829	82/10654	0.99997	1	0.907361	RPA2/POLD1/RUVBL1	3
R-HSA-168255	Influenza Life Cycle	9/1829	144/10654	0.999973	1	0.907361	IPO5/NUP93/POLR2E/GTF2F1/CALR/XPO1/NUP210/RPL10A/POM121	9
R-HSA-110330	Recognition and association of DNA glycosylase with site containing an affected purine	1/1829	56/10654	0.999975	1	0.907361	OGG1	1
R-HSA-110331	Cleavage of the damaged purine	1/1829	56/10654	0.999975	1	0.907361	OGG1	1
R-HSA-73927	Depurination	1/1829	56/10654	0.999975	1	0.907361	OGG1	1
R-HSA-72172	mRNA Splicing	14/1829	191/10654	0.999981	1	0.907361	HNRNPU/HNRNPF/PCF11/CPSF2/RNPS1/DDX5/POLR2E/GTF2F1/USP39/PPIL3/FIP1L1/SLU7/SF3B5/PUF60	14
R-HSA-72203	Processing of Capped Intron-Containing Pre-mRNA	20/1829	244/10654	0.999986	1	0.907361	HNRNPU/HNRNPF/NXF1/PCF11/CPSF2/RNPS1/NUP93/DDX5/POLR2E/GTF2F1/USP39/PPIL3/NXT1/NUP210/FYTTD1/FIP1L1/SLU7/SF3B5/POM121/PUF60	20
R-HSA-2299718	Condensation of Prophase Chromosomes	2/1829	74/10654	0.999986	1	0.907361	SMC4/PHF8	2
R-HSA-156827	L13a-mediated translational silencing of Ceruloplasmin expression	5/1829	111/10654	0.99999	1	0.907361	EIF3I/EIF3M/EIF3K/RPL10A/PABPC1	5
R-HSA-427389	ERCC6 (CSB) and EHMT2 (G9a) positively regulate rRNA expression	2/1829	76/10654	0.99999	1	0.907361	ERCC6/CBX3	2
R-HSA-72689	Formation of a pool of free 40S subunits	4/1829	101/10654	0.999991	1	0.907361	EIF3I/EIF3M/EIF3K/RPL10A	4
R-HSA-1799339	SRP-dependent cotranslational protein targeting to membrane	5/1829	112/10654	0.999991	1	0.907361	SEC61A2/SPCS2/SEC11A/SRPRB/RPL10A	5
R-HSA-168273	Influenza Viral RNA Transcription and Replication	7/1829	134/10654	0.999993	1	0.907361	IPO5/NUP93/POLR2E/GTF2F1/NUP210/RPL10A/POM121	7
R-HSA-73728	RNA Polymerase I Promoter Opening	1/1829	63/10654	0.999993	1	0.907361	MAPK3	1
R-HSA-156842	Eukaryotic Translation Elongation	3/1829	93/10654	0.999995	1	0.907361	EEF2/EEF1A2/RPL10A	3
R-HSA-72764	Eukaryotic Translation Termination	3/1829	93/10654	0.999995	1	0.907361	TRMT112/ETF1/RPL10A	3
R-HSA-5578749	Transcriptional regulation by small RNAs	4/1829	106/10654	0.999996	1	0.907361	NUP93/POLR2E/NUP210/POM121	4
R-HSA-975956	Nonsense Mediated Decay (NMD) independent of the Exon Junction Complex (EJC)	3/1829	95/10654	0.999997	1	0.907361	ETF1/RPL10A/PABPC1	3
R-HSA-8936459	RUNX1 regulates genes involved in megakaryocyte differentiation and platelet function	3/1829	97/10654	0.999998	1	0.907361	NFE2/PRMT1/DPY30	3
R-HSA-5693571	Nonhomologous End-Joining (NHEJ)	1/1829	69/10654	0.999998	1	0.907361	UBE2N	1
R-HSA-912446	Meiotic recombination	2/1829	86/10654	0.999998	1	0.907361	RPA2/BRCA2	2
R-HSA-72706	GTP hydrolysis and joining of the 60S ribosomal subunit	4/1829	112/10654	0.999999	1	0.907361	EIF3I/EIF3M/EIF3K/RPL10A	4
R-HSA-156902	Peptide chain elongation	2/1829	89/10654	0.999999	1	0.907361	EEF2/RPL10A	2
R-HSA-2408557	Selenocysteine synthesis	2/1829	93/10654	1	1	0.907361	RPL10A/SECISBP2	2
R-HSA-5617472	Activation of anterior HOX genes in hindbrain development during early embryogenesis	4/1829	122/10654	1	1	0.907361	RARG/POLR2E/HOXA1/RXRA	4
R-HSA-5619507	Activation of HOX genes during differentiation	4/1829	122/10654	1	1	0.907361	RARG/POLR2E/HOXA1/RXRA	4
R-HSA-211000	Gene Silencing by RNA	5/1829	136/10654	1	1	0.907361	TDRKH/NUP93/POLR2E/NUP210/POM121	5
R-HSA-192823	Viral mRNA Translation	1/1829	89/10654	1	1	0.907361	RPL10A	1
R-HSA-6805567	Keratinization	8/1829	214/10654	1	1	0.907361	KRT7/TGM5/FURIN/PCSK6/PPL/KRT10/JUP/PKP4	8
